# Supplementary material for: High resolution ancient sedimentary DNA shows that alpine plant biodiversity is a result of human land use
Source: Research Square preprint supplement (doi:10.21203/rs.3.rs-908129/v1), 2021-09-22
Supplement: Supplementary file 1 [file 538f0615e7e3c301dc8f17fe.xlsx]

## Sheet: Readme
	Table	Legend
Data set S	S1	TrnL p6loop plant sequences
Data set S	S2	pollen vs DNA
Data set S	S3	age-depth
Data set S	S4	16S mammal sequences
Data set S	S5	tag-sample lookup

## Sheet: S1
		id	EG33_C001	EG33_C002	EG33_C003	EG33_C004	EG33_C005	EG33_C005a	EG33_C006a	EG33_C006b	EG33_C006c	EG33_C007	EG33_C007a	EG33_C008a	EG33_C008b	EG33_C008c	EG33_C009	EG33_L040	EG33_L049	EG33_L058	EG33_L067	EG33_L076	EG33_L085	EG33_L094	EG33_L103	EG33_L112	EG33_L121	EG33_L130	EG33_L139	EG33_L148	EG33_L157	EG33_L166	EG33_L175	EG33_L184	EG33_L193	EG33_L211	EG33_L220	EG33_L229	EG33_L238	EG33_L247	EG33_L256	EG33_L265	EG33_L274	EG33_L283	EG33_L292	EG33_L301	EG33_L310	EG33_L319	EG33_L328
		Type	avgpread	avgpread	avgpread	avgpread	avgpread	avgpread	avgpread	avgpread	avgpread	avgpread	avgpread	avgpread	avgpread	avgpread	avgpread	avgpread	avgpread	avgpread	avgpread	avgpread	avgpread	avgpread	avgpread	avgpread	avgpread	avgpread	avgpread	avgpread	avgpread	avgpread	avgpread	avgpread	avgpread	avgpread	avgpread	avgpread	avgpread	avgpread	avgpread	avgpread	avgpread	avgpread	avgpread	avgpread	avgpread	avgpread	avgpread
		Depth																2021-05-13	2021-05-22	2021-05-31	40.5	49.5	58.5	67.5	80.5	89.5	98.5	107.5	116.5	125.5	134.5	143.5	152.5	161.5	170.5	160.5	169.5	178.5	187.5	188.5	197.5	206.5	215.5	224.5	233.5	242.5	251.5	260.5	269.5
		Age																11	66	120	177	231	288	346	433	492	551	611	677	740	806	870	936	1004	1013	1081	1089	1159	1237	1245	1328	1440	1560	1678	1790	1905	2037	2174	2317
subset:10026	Bupleurum 2	atcctttatttaatttacaaaaacaaacaaaggcccagaaggtgaaaaag	0	0	0	0	0	0	0	0	0	0	0	0	0	0	0	286504	0	0	0	0	2.47E-05	0	456204	0	0	0	3.94E-05	1.06E-05	9.13E-05	0	3.40E-05	471698	0	0	0	0	0	0	0	0	0	0	0	0	0	0	0
subset:10054	Hypericum 111	atccggctttccgaaaacaaagaaagattcataaacagaaaaaaaaag	0	0	0	0	0	0	0	0	0	0	0	0	0	0	0	0	3.21E-05	18338	175649	9.16E-05	4.94E-05	0	0	4.47E-05	3.27E-05	128938	6.24E-05	7.62E-05	124424	11219	1649608	1427054	245724	894019	1445979	2740664	2538693	4674741	3191553	2510478	247805	1081839	2186455	517409	5321504	0	67169792
subset:10065	Myrtoideae	atcctgttttacgaaaaccaacaaaacaataagggttcataaagcgagaataaaaaaaggatag	0	0	242376444	812280103	0	0	0	0	0	0	0	0	0	0	0	0	0	0	0	0	0	0	0	0	0	0	0	0	0	0	0	0	0	0	0	0	0	0	0	0	0	0	0	0	0	0	0
subset:10614	Asteraceae 211	atcacgttttccgaaaacaaacaaaggttcagaaagcgaaaatcaaaaag	0	0	0	0	0	0	0	0	0	0	0	0	0	0	0	12437146	13153937	834761	6714611	4559216	17367482	1571746	3958103	5692805	16158094	6001827	5076334	15425068	15697492	3070497	1484648	952903	6077493	3080951	3184507	1376212	2052926	1164016	22718	2264104	3659338	4916927	489419	565011	1102998	0	286097
subset:10632	Bryaceae 1	attttattgtatattaaaaataa	0	0	0	0	0	0	0	0	0	0	0	0	0	0	0	0	7.90E-06	0	2.72E-05	0	0	0	285128	0	0	4.36E-05	0	1.06E-05	0	0	0	0	0	0	0	0	0	0	0	0	0	0	0	2.70E-05	0	0	796575
subset:10645	Asteraceae 18	atcacgtttttcgaaaacaaacaaaggttcagaaagcgaaaatcaaaaag	0	0	0	0	0	0	0	0	0	0	0	0	0	0	0	0	0	0	0	0	0	0	0	0	0	0	0	0	0	0	0	0	0	0	0	0	0	0	0	0	0	0	0	0	0	0	0
subset:10700	Melampyrum sylvaticum	ctcctgttttctcaaaataaagattcagaaaacaaaaaaag	0	0	0	0	0	0	0	0	0	0	0	0	0	0	0	201259	0	0	0	0	0	0	0	0	0	0	0	1.06E-05	9.13E-05	0	4.53E-05	193899	0	0	0	0	0	5.86E-05	0	0	0	0	0	0	0	0	2415374
subset:10784	Tetraphis pellucida	atctcatttaataaataa	0	0	0	0	0	0	0	0	0	0	0	0	0	0	0	0	0	0	0	0	0	0	0	0	0	0	0	0	0	0	0	0	7.60E-05	0	0	0	0	0	0	0	0	0	0	0	0	0	0
subset:10813	Equisetum 2	attctatttag	0	0	0	0	0	0	0	0	0	0	0	0	0	0	0	0	0	0	0	0	0	0	0	0	5.65E-05	0	0	0	0	0	0	0	0	0	0	0	0	0	198844	0	0	0	0	0	0	0	0
subset:10817	Lonicera alpigena	atccagttttccgaaaacaagggtttagatagaaagcaaaaatcaataaag	0	0	0	0	0	0	0	0	0	0	0	0	0	0	0	0	0	0	0	0	0	0	0	0	0	0	0	0	0	0	0	0	0	0	8.06E-05	0	0	118503	0	0	4.06E-05	0	5.14E-05	9.86E-05	123424	0	0
subset:10917	Nannochloropsis granulata	ctcatgaaagtg	0	0	0	0	0	0	0	0	0	0	0	0	0	0	0	7106747	0	0	982699	537076	6444265	31148723	1482409	16001654	0	0	0	0	0	0	0	0	0	0	0	0	5.42E-05	1.97E-05	0	0	340106	762195	0	0	0	0	0
subset:10970	Oreoherzogia pumila	atcctgttttctgaaaacaaacaaaggttcagaaagcgataataaaaaaggatagatagg	0	0	0	0	0	0	0	0	0	0	0	0	0	0	0	101119	3.69E-05	0	0	0	0	0	354394	0	0	0	0	0	0	0	0	0	0	0	0	0	0	0	0	0	0	0	0	0	0	0	0
subset:11011	Musa ornata	tccttattttgagaaaacaaaggtttataaaactagaatttaaaag	0	0	0	0	0	0	0	0	7084189	0	0	0	0	0	0	0	0	0	0	0	0	0	0	0	0	0	0	0	0	0	0	0	0	0	0	0	0	0	0	0	0	0	0	0	0	0	0
subset:11020	Daphne mezereum	atcctgttttacgaaaataaataagagttcgtaaagaaagaatttaaataaaaaagg	0	0	0	0	0	0	0	0	0	0	0	0	0	0	0	0	5.90E-05	0	0	4.87E-05	0	0	0	0	0	0	0	0	0	0	4.94E-05	0	0	0	0	0	0	0	0	0	0	0	0	0	0	0	0
subset:11155	Castanea sativa	atcctattttacgaaaacaaataagggttcagaagaaagcgagaataaaaaaaag	0	0	0	0	0	0	0	0	0	0	0	0	0	0	0	0	0	0	815814	0	0	0	171077	0	0	0	0	0	0	0	1.62E-05	0	0	0	0	0	0	0	0	0	0	0	0	0	0	0	0
subset:11189	Myrtaceae	atcctgttttacgaaaaccaacaaaacaataagggttcataaagcgagaataaaaaaag	0	0	9.03E-05	570471	0	0	0	0	0	0	0	0	0	0	0	0	0	0	0	0	0	0	0	0	0	0	0	0	0	0	0	0	0	0	0	0	0	0	0	0	0	0	0	0	0	0	0
subset:11240	Oenothera rosea	atcctattttacgaaaaccaacaccgggggtttagaaagcgagaaaaaaag	0	0	0	0	0	0	0	0	0	0	0	0	0	0	0	0	0	0	0	0	0	0	0	0	0	0	0	0	0	0	0	0	0	0	0	0	0	0	0	0	0	0	0	0	0	0	0
subset:11296	Senecioneae	atcacgttttccgaaaacaaacaaaggttcagaaaacgaaaataaaaaag	0	0	0	0	0	0	0	0	0	0	0	0	0	0	0	0	0	0	0	0	0	0	0	0	0	0	0	0	0	0	0	0	0	0	0	0	0	0	0	0	0	0	0	0	0	0	0
subset:11299	Teucrium montanum	atcctgttttctcaaaacaaaggttcaaaaaacgaaaaaaaggg	0	0	0	0	0	0	0	0	0	0	0	0	0	0	0	0	0	0	0	0	0	0	0	0	0	0	0	0	0	0	0	0	0	0	0	0	0	0	0	0	0	0	0	0	0	0	0
subset:11335	Closterium baillyanum	atcctatgaatcaaacaatag	0	0	0	0	0	0	0	0	0	0	0	0	0	0	0	515677	0	0	0	235479	0	0	0	14646041	0	0	7.36E-06	0	362718	0	124042	0	5.41E-05	0	0	0	0	0	358275	0	0	0	0	0	0	0	0
subset:1134	Epilobium	atcctattttacgaaaaccaacaccgggggtttagaaagcgagaaaaaaaaag	0	0	0	0	0	0	0	0	0	0	0	0	0	0	0	0	0	0	0	0	0	0	0	0	0	0	0	0	0	0	0	0	0	0	0	0	0	0	0	0	0	0	0	0	0	0	0
subset:11368	Orobanche 2	atcctattttatcaaaacaaagtttagaaaaagaaaaggg	0	0	0	0	0	0	0	0	0	0	0	0	0	0	0	0	0	0	0	0	0	0	0	0	0	0	0	0	0	0	0	0	0	0	0	0	0	0	0	0	0	0	0	0	0	0	0
subset:11513	Astragalus 111	atcctgctttccgaaaacaaaaaaataaaagttcagaaagttaaaattaaacaaaaaag	0	0	0	0	0	0	0	0	0	0	0	0	0	0	0	0	0	0	506403	0	0	0	0	0	0	1.37E-05	104743	3.24E-05	0	0	5.71E-05	174346	0	0	170368	0	186197	5.90E-05	21512	0	0	0	0	0	0	0	280576
subset:11639	Luzula 1	atcttaatctggagaaaatttgtttctctataaaaactagaatcaaaaag	0	0	0	0	0	0	0	0	0	0	0	0	0	0	0	0	2.95E-05	0	12986	274012	0	0	708789	0	0	8.23E-06	3.03E-05	3.95E-05	29321	4.01E-05	387556	280989	93345	0	492172	0	670139	844878	472442	0	0	0	0	0	0	0	943208
subset:11684	Pedicularis verticillata 111	atcttcttttttttttcaaaacaaaggttcagaaaacgaaaaaaag	0	0	0	0	0	0	0	0	0	0	0	0	0	0	0	221564	5038691	1239205	547874	190501	1857265	6631309	946756	4.47E-05	1.96E-05	251406	395141	1413605	210061	800726	158394	227866	377533	1647007	18586	180951	4.07E-05	5.05E-05	197328	0	486516	766751	3.02E-05	0	1136272	0	164082
subset:11692	Gymnadenia conopsea 111	atcttaaaaaaaaaaaaaaatggaaaatgagaataaaaaga	0	0	0	0	0	0	0	0	0	0	0	0	0	0	0	0	0	0	0	0	0	0	0	0	0	0	0	0	0	0	0	0	0	0	0	0	0	0	0	0	0	0	0	0	0	0	0
subset:11933	Musaceae	atccttattttgagaaaacaaaggtttataaaactagaatttaaaag	0	0	0	0	0	125	0	0	69712526	0	0	0	0	0	0	6.74E-05	0	0	0	0	0	0	0	0	0	0	0	0	0	0	0	0	0	0	0	0	0	0	0	0	0	0	0	0	0	0	0
subset:11967	Caltha palustris	atccggttttcagaaaacaaaaaaagggattcagaaagcaagaatcaaaaag	0	0	0	0	0	0	0	0	0	0	0	0	0	0	0	35945673	16352862	63486992	54915035	72896954	19903501	20571262	9684624	37085183	13880579	3981461	1889751	4911356	32059004	20511562	2202684	24871387	13568135	35035902	1674753	22536802	55078997	2585835	60594014	34418214	24036695	23109198	3313577	7341881	40092175	0	11654646
subset:12166	Gentianopsis ciliata	atcctatttttcaaaaaagcaaaaagaaaagaaaggctcagaaagaaaaaaag	0	0	0	0	0	0	0	0	0	0	0	0	0	0	0	0	1.84E-05	0	0	0	120087	0	0	0	5.24E-05	7.69E-05	3.01E-05	0	0	0	0	0	0	102369	254582	0	0	0	0	0	0	0	0	0	0	0	1.48E-05
subset:12237	Stellaria nemorum	ctccttaattgtctcctaaaaaaaaaaacggattcaaaaagcaagaataaaaaag	0	0	0	0	0	0	0	0	0	0	0	0	0	0	0	0	0	0	0	0	2.66E-05	0	0	0	0	0	0	0	0	0	0	0	0	0	0	0	0	0	0	0	0	0	132165	0	0	0	0
subset:12241	Apioideae 3	atcctattttccaaaaacaaacaaagacccagaaggtgaaaaaag	0	0	0	0	0	0	0	0	0	0	0	0	0	0	0	0	0	0	0	0	0	0	0	0	0	0	0	0	0	0	0	0	1.39E-05	0	0	0	0	0	0	0	0	0	8.06E-05	0	0	0	0
subset:12273	Solanaceae	atcctattttctgaaaacaaataaaggttcagaaaaaaag	0	0	0	0	0	0	0	125	0	0	0	0	0	0	0	0	0	0	0	258799	0	0	0	0	0	0	0	0	0	0	0	5.53E-05	0	0	0	0	0	0	0	0	0	0	0	0	0	0	0
subset:12386	Pinguicula alpina	atcctgttttctcaaaagaaaggttccgaaaacgaaaaaaaaaatag	0	0	0	0	0	0	0	0	0	0	0	0	0	0	0	14637	0	0	0	0	0	0	0	0	0	0	0	0	0	0	0	0	0	0	0	0	0	0	0	0	0	0	0	0	0	0	0
subset:12442	Apioideae 2	atcctattttacaaaaacaaacaaaggcccagaaggtgaaaaaag	0	0	0	0	0	0	0	0	0	0	0	0	0	0	0	0	0	0	0	0	0	0	0	0	0	0	0	0	0	0	5.05E-05	0	0	0	0	0	0	0	0	0	0	0	0	0	0	0	0
subset:12467	Leontodon hispidus 111	atcacgttttccgaaaacaaacgaaggttcagaaagcgaaaataaaaaag	0	0	0	0	0	0	0	0	0	0	0	0	0	0	0	93878987	84024663	19215346	7335556	18006837	34564225	19323581	7063679	16078956	69107624	16445652	4578963	30219373	13242545	31786145	17855782	15050235	10891216	12677072	11415986	5066092	8448558	4304151	3477734	6583862	699109	1329213	7152091	2391992	3668623	0	6309934
subset:12582	Avenula pubescens	atccgtgttttgagaaaactaggtggttctcaaactagaatacaaaggaaaag	0	0	0	0	0	0	0	0	0	0	0	0	0	0	0	0	0	0	0	0	0	0	148898	0	0	0	0	1.06E-05	0	200129	257031	0	2.31E-05	0	3.13E-05	0	0	0	0	0	0	0	0	0	0	0	0
subset:13070	Primula farinosa	atcctctttttagaaaacaaagatgaaaggaaaggggg	0	0	0	0	0	0	0	0	0	0	0	0	0	0	0	252798	2.47E-05	2346354	4.08E-05	1301443	3457	281788	0	1446125	416078	257106	191913	205288	855795	263469	1.23E-05	142324	102539	0	0	0	0	0	0	0	0	0	0	0	0	0	0
subset:13106	Saxifraga rotundifolia	atcctgttttaagaaagcaaaacacaagagttcagaaaaagcgaataaaaaaaaagaag	0	0	0	0	0	0	0	0	0	0	0	0	0	0	0	0	2.32E-05	18522	267753	1.32E-05	117015	1260239	0	0	0	3.73E-05	5.66E-05	4.97E-05	1.73E-05	6.69E-05	627075	98596	5.91E-05	9.23E-05	494311	315514	1217684	621534	832401	0	168579	34459	336618	0	326182	0	674491
subset:1316	Sphagnum	atcttgttttcataacataaatgg	0	0	0	0	0	0	0	0	0	0	0	0	0	0	0	0	5.29E-05	0	0	5.23E-05	0	0	0	0	4.58E-05	0	0	0	0	0	0	0	0	0	0	0	0	0	0	0	0	0	0	0	0	0	0
subset:13169	Bryaceae 2	attttattgtctattaaaaataa	0	0	0	0	0	0	0	0	0	0	0	0	0	0	0	9.15E-05	2.19E-05	156446	315695	0	0	0	0	3.73E-05	0	8.23E-06	0	0	331126	0	0	4.05E-05	0	0	3.43E-05	0	0	320638	9.80E-06	0	0	0	0	0	0	0	119148
subset:13196	Asterales 6	atcacgttttccgaaaacaaacaaaggtttagaaagcgaaaataaaaaag	0	0	0	0	0	0	0	0	0	0	0	0	0	0	0	0	0	0	0	103668	0	0	0	0	0	0	0	0	0	0	0	0	0	0	0	0	0	0	0	0	0	0	0	0	0	0	0
subset:13255	Botrychium	atcttgtttctacgacga	0	0	0	0	0	0	0	0	0	0	0	0	0	0	0	493421	0	0	0	0	0	0	354394	0	0	0	7.36E-06	4.35E-05	0	0	808202	22427	1289859	421443	2.52E-05	0	5.42E-05	2524172	0	0	159484	0	0	0	0	0	23323
subset:13425	Triticeae	atccgtgttttgagaaaacaaggggttctcgaactagaatacaaaggaaaag	0	0	0	125	0	0	0	0	0	0	0	0	0	0	0	0	4.82E-05	843645	0	137363	0	0	0	0	0	0	0	0	0	0	0	0	0	0	0	0	0	0	0	0	0	0	0	0	0	0	0
subset:13517	Asteraceae 16	atcacgttttccaaaaacaaacaaaggttcagaaagcgaaaatcaaaaag	0	0	0	0	0	0	0	0	0	0	0	0	0	0	0	0	0	0	0	0	0	0	0	179662	0	0	0	0	0	0	0	0	0	0	0	0	0	0	0	0	0	0	0	0	0	0	0
subset:13596	Euphrasia 1	atcctgttttttccaaacaaagattcagaaaacgaaaaaaag	0	0	0	0	0	0	0	0	0	0	0	0	0	0	0	3713099	44371	1370388	2392114	1155207	1004038	4704912	49606	55849	488559	1593057	113425	1520819	1441106	4412461	2033395	1765981	89238	3756532	1229344	282298	0	7.73E-05	292482	0	175997	603032	0	0	0	0	170252
subset:13669	Poaceae	atccgtgttttgagaaaacaaggaggttctcgaactagaatacaaaggaaaag	0	0	0	0	0	0	0	0	0	0	0	0	0	0	0	7298201	7919434	3333595	640116	2459293	2001474	4091477	2806034	3430112	5020726	10510445	1089546	4138243	2589061	176631	392974	1776317	1216184	885901	1636198	3171043	195997	1460862	1051289	0	236318	1665984	1314667	669621	7043126	0	4101287
subset:13976	Plantago 2	atcctgtcttctcaaaataaaggttcagaaagcgagaaaaagg	0	0	0	0	0	0	0	0	0	0	0	0	0	0	0	36651755	19283042	28340425	34465158	35773564	43644358	54850986	16687081	11135296	9998145	12573897	4526973	25975492	10824976	2182983	2299718	4245606	3624986	878041	1956146	827735	1836367	903153	757963	0	2.71E-05	0	831518	359253	1557137	0	7.23E-05
subset:14039	Anemone narcissiflora	atccttttttgttttcagaaaaaacaaacaaaacaaaagggcttcagaaagcaaaaataaacataaag	0	0	0	0	0	0	0	0	0	0	0	0	0	0	0	0	0	0	0	0	0	0	0	0	8.25E-05	0	0	0	0	0	0	0	0	0	0	106519	0	0	0	0	0	0	0	0	0	0	120586
subset:14162	Crepis paludosa	atcacgttttccgaaaacaaaaaaagattcagaaagcgaaaatcaaaaag	0	0	0	0	0	0	0	0	0	0	0	0	0	0	0	0	0	0	0	0	0	0	0	0	0	0	0	0	0	0	0	4.56E-05	0	0	3.13E-05	0	4.07E-05	3.26E-05	6.58E-05	0	0	0	0	2.70E-05	0	0	0
subset:1420	Hypochaeris maculata	atcacgttttccaaaaacaaacaaaggttcagaaagcgaaaataaaaaag	0	0	0	0	0	0	0	0	0	0	0	0	0	0	0	0	0	0	0	0	0	0	0	0	0	0	0	0	0	0	0	0	0	0	0	0	0	0	0	0	0	0	0	0	0	0	0
subset:14219	Epilobium 1	atcctattttacgaaaaccagcaccgggggtttagaaagcgataaaaaaaaag	0	0	0	0	0	0	0	0	0	0	0	0	0	0	0	0	3.97E-05	279898	9.90E-05	5.62E-05	5.19E-05	0	0	6.71E-05	122779	454595	3.78E-05	179419	174047	8.03E-05	703089	432489	410061	450182	524153	80407	3125767	1804139	3537083	0	0	531206	0	258814	665922	0	182598
subset:14341	Brassicaceae	atcctgggttacgcgaacaaaccggagtttagaaagcgagaaaaaagg	0	0	0	0	0	0	0	0	0	0	0	0	0	0	0	0	0	0	0	0	0	0	0	0	0	0	0	0	0	0	0	0	0	0	0	0	0	0	0	0	0	0	0	0	0	0	0
subset:14359	Deschampsia	tccatgttttgagaaaacaagggggttctcgaactagaatgcaaaggaaaag	0	0	0	0	0	0	0	0	0	0	0	0	0	0	0	206612	8.29E-05	0	5.25E-05	9.92E-06	0	0	0	0	0	0	0	0	0	0	7.09E-05	3.45E-05	0	222019	4.10E-05	5.29E-05	479609	0	7.89E-05	0	0	0	1.40E-05	0	0	0	5.87E-05
subset:14360	Sempervivum	atcttcttttccgaaaccaaacccaactacgggggttcaaaaagcgaaaataaaaaag	0	0	0	0	0	0	0	0	0	0	0	0	0	0	0	0	0	0	0	0	0	0	0	0	0	0	0	0	0	0	100563	0	1.62E-05	0	0	0	0	0	0	0	0	0	0	0	0	0	0
subset:14361	Carex caryophyllea	atcttctttattgagaaaaagaaatatataaaatatttcttatttcagataagaaataatatttttttttatctaatattaaa	0	0	0	0	0	0	0	0	0	0	0	0	0	0	0	0	220763	0	0	0	0	0	0	0	0	143375	0	1.06E-05	0	0	0	0	0	0	0	0	0	0	0	0	0	0	0	0	0	0	0
subset:14780	Potamogeton alpinus	atccctgttttgagaaaaaagggtttattttctctatttcgaattttctattatatagaaattcgaaaataacaattttaaaaagg	0	0	0	0	0	0	0	0	0	0	0	0	0	0	0	73859738	2962535	23486623	284144438	98940852	771167	134551143	16162856	118685495	114294654	11921507	3997805	28288925	277488556	183021331	107743121	150898507	442911652	33197446	231182599	379893777	159612657	206364338	147396587	13121067	54732057	107770512	14979655	19362066	126584684	118563882	91360199
subset:14802	Carex frigida	atcttctttttgagaaaaataaatatatgaaatattttttatttcagataagaaataatatttcttattatctaatattaaa	0	0	0	0	0	0	0	0	0	0	0	0	0	0	0	0	2.37E-05	0	0	0	3.97E-05	0	0	0	0	1.59E-05	0	0	0	0	0	0	0	0	0	1.79E-05	0	0	0	0	0	4.24E-05	0	0	0	0	1382959
subset:14821	Asterales 2	atcacgttttccgaaaacaaataaaggttcagaaagcgaaaataaaaaag	0	0	0	0	0	0	0	0	0	0	0	0	0	0	0	0	0	0	0	0	0	0	0	0	0	0	0	0	0	0	0	0	0	0	0	169991	0	0	0	0	0	0	0	0	721556	0	0
subset:14857	Bartsia alpina	atcctgttttcttaaaacaaagattcagaaaacgaaaaataaag	0	0	0	0	0	0	0	0	0	0	0	0	0	0	0	15336647	3293839	6776433	3756978	2897022	903913	0	39482	277157	301799	287104	236944	945962	665342	650636	502096	1410408	903848	1737477	612813	989417	1106374	1000411	683667	0	678318	6808835	252642	208744	4415633	0	5451729
subset:14902	Campanula thyrsoides	atccggttttctgccagccaataacaaaagccagaaagcgaaaatcaaaaag	0	0	0	0	0	0	0	0	0	0	0	0	0	0	0	0	0	0	0	0	0	0	0	0	0	0	0	0	0	0	0	0	0	0	0	0	0	117114	0	0	0	0	0	0	0	0	0
subset:14959	Sedum album	atcttcttttccgaaaccaaacccagatacaggggtttaaaaagcgagaataaaaaag	0	0	0	0	0	0	0	0	0	0	0	0	0	0	0	0	0	0	0	0	117452	0	0	0	0	0	7.40E-06	0	0	0	0	0	0	0	0	0	0	0	0	0	0	0	0	0	0	0	0
subset:15049	Arctostaphylos uva-ursi 2	atctttttttttttcgaaaataaagaaagattcagaaagcgaaaaaaaag	0	0	0	0	0	0	0	0	0	0	0	0	0	0	0	5.06E-05	142454	0	544502	237211	219368	0	0	8.20E-05	1.96E-05	9.03E-05	7.36E-06	3.73E-05	6.90E-05	4.01E-05	44432	663698	349503	964706	27799	129786	58823	350354	132038	0	0	518225	1.40E-05	3.72E-05	0	0	8.26E-05
subset:1517	Silene	ctccttttttcaaaagcaaaaaaaggtattaagaaagcaagaaaaaaag	0	0	0	0	0	0	0	0	0	0	0	0	0	0	0	0	0	0	0	0	0	0	0	0	0	0	0	0	0	0	0	0	0	0	0	0	110489	0	0	0	0	0	4.28E-05	0	0	0	19023
subset:15379	Primula 3	atcctctttttcgaaaacaaaggttaaaggaaaataaaaaaaggggg	0	0	0	0	0	0	0	0	0	0	0	0	0	0	0	0	5.51E-05	0	0	0	186033	0	7.44E-05	7.45E-05	5.89E-05	1.10E-05	1.50E-05	0	0	4.01E-05	0	0	2.10E-05	0	2.08E-05	0	0	9.02E-05	0	0	0	0	0	0	0	0	6.41E-05
subset:1539	Meum athamanticum 111	atcctattttccaaaaacaaacaaaggcctagaaggtgaaaaaag	0	0	0	0	0	0	0	0	0	0	0	0	0	0	0	1733316	1397596	566454	3601646	5888628	173087	9570878	637073	1975676	1203722	134804	345491	960889	171749	1660356	3789206	8002802	1976752	1409979	3606774	3084896	14223348	8722179	11085574	19724563	553748	8152478	3101023	1753847	8418371	0	119040079
subset:15393	Dryas octopetala	atcctgttttatgaaaacaaacaagggtttcagaaagcgcgaataaaaagg	0	0	0	0	0	0	0	0	0	0	0	0	0	0	0	1152823	1070272	3105647	2320356	1920904	2149398	2467235	127627	948241	610319	809929	341147	896555	3187742	1140355	2.16E-05	323001	2585346	2011781	2370155	534316	360409	197612	226027	0	109662	1400881	244085	0	2911725	0	1663031
subset:15425	Linum catharticum	atcctgttttccgaaaaaaattcctaaagacagaataaaacag	0	0	0	0	0	0	0	0	0	0	0	0	0	0	0	940859	38105	547559	383398	3092932	599206	691563	0	803409	440123	241286	159354	22357	0	653154	176227	0	1.85E-05	0	0	138715	0	0	0	0	0	0	0	0	0	0	0
subset:15515	Oenothera 111	atcctattttacgaaaaccaacaccgggggtttagaaagcgagaaaaaaaaaag	0	0	0	0	0	0	0	0	0	0	0	0	0	0	0	0	0	0	0	0	0	0	0	0	0	0	0	0	0	0	0	0	0	0	0	0	0	0	0	0	0	0	0	0	0	0	0
subset:1552	Myosotis arvensis	atccggtttccgaaaacaaacaaaagttgaaaaagaaaaaaggaag	0	0	0	0	0	0	0	0	0	0	0	0	0	0	0	0	0	0	855568	0	0	164984	2717771	4175447	399511	4.62E-05	123541	389651	50161	1020492	11205228	12611076	3274357	1788793	3227518	46687	8531964	6472432	1143924	2439443	4090199	9231902	6790596	5601343	14212125	0	3132112
subset:15767	Pimpinella	atcctattttccaaaaacaaacaaaggcccagaaggcgaaaaaag	0	0	0	0	0	0	0	0	0	0	0	0	0	0	0	0	3.71E-05	0	0	0	0	0	156799	299513	85138	948268	1052483	1658069	38129	5264692	9562004	3814521	2010863	132926	4295369	2365664	5582264	2340575	3226033	8234114	7497459	5270205	306462	311979	4538899	0	850744
subset:15855	Phyteuma	atccggttttctgacaataacaagttcagaaagcgaaaatcaaaaag	0	0	0	0	0	0	0	0	0	0	0	0	0	0	0	0	0	0	0	0	0	0	0	0	0	0	0	0	0	0	0	0	0	0	9.05E-05	107425	0	4.44E-05	195209	0	0	0	7.70E-05	0	0	0	677435
subset:15902	Saxifraga paniculata	atcctgttttaagaaagcaaaacacaagggttcagaaaaagtcaaaaaaaaaaaag	0	0	0	0	0	0	0	0	0	0	0	0	0	0	0	0	4.07E-05	5.48E-05	123036	153121	5.56E-05	0	0	0	0	4.23E-05	7.40E-06	9.89E-05	9.61E-05	9.01E-05	0	0	2.31E-05	3.99E-05	3.13E-05	0	0	5.41E-05	9.80E-06	0	0	0	0	0	0	0	7.33E-05
subset:16132	Festuca pratensis	tccgtgttttgagaaaacaaggaggttctcgaactagaatacaaaggaaaag	0	0	0	0	0	0	0	0	0	0	0	0	0	0	0	38526	459534	7.54E-05	8.00E-05	10723	160226	0	9.41E-05	0	290591	595441	9.04E-05	8.08E-05	3.48E-05	0	155362	3.95E-05	4.74E-05	0	7.27E-05	121166	0	3.26E-05	0	0	0	0	5.04E-05	0	50527	0	3.00E-05
subset:16144	Viola biflora 111	atccggttttttgaaattaaaaaaaaagtttatatagacagaataaaaaag	0	0	0	0	0	0	0	0	0	0	0	0	0	0	0	0	0	279642	0	0	0	0	0	2.24E-05	0	8.07E-05	0	7.53E-05	7.44E-05	0	111667	4.14E-05	0	0	13991	6.57E-05	0	0	4.07E-05	0	0	0	3.68E-05	7.17E-06	0	0	890066
subset:16295	Melica nutans	atccttgttttgagaaaacaagtggttctggaactagaatccaaaggaaaag	0	0	0	0	0	0	0	0	0	0	0	0	0	0	0	0	0	0	0	0	0	0	0	0	0	0	0	0	0	0	0	0	0	0	0	0	0	0	0	0	0	0	0	0	0	0	0
subset:16301	Potamogeton	atccctgttttgagaaaaaagggtttattttctctatttcgaattttctattatatagaaattcgaaaataagaatttaaaaaagg	0	0	0	0	0	0	0	0	0	0	0	0	0	0	0	0	0	0	206764	16471	0	0	0	2.24E-05	2.62E-05	0	0	0	700735	726846	789928	8559698	6524156	10856397	15177273	5521307	45689069	13095816	20063894	486381	1578931	9421328	609156	623508	6009351	2165461	2445801
subset:16367	Lathyrus pratensis	atccttctttccgaaaacaaacaaataaaagttcagaaactgaaaatcaaaaaag	0	0	0	0	0	0	0	0	0	0	0	0	0	0	0	0	0	0	0	0	0	0	0	0	0	0	0	0	0	0	0	0	2.70E-05	0	0	0	0	104036	0	0	4.06E-05	0	0	9.99E-05	0	0	7.30E-05
subset:16477	Asteraceae 6	atcacgttttccgaaaacaaacaaagattcagaaagcgaaaatcaaaaag	0	0	0	0	0	0	0	0	0	0	0	0	0	0	0	10048395	21838435	18504847	8803926	9608597	18172463	5316668	6468969	8290242	252763	1824041	3580999	2037786	7821426	28321797	4130328	3968631	4615046	1804725	2498556	612473	2478486	1521424	1155018	0	3235559	151302	476883	393618	927361	0	1798425
subset:16516	North American clade	atcacgttttccgaaaacaagcaaaggttcagaaagcgaaaatcaaaaag	0	0	0	0	0	0	0	0	0	0	0	0	0	0	0	0	165898	0	2.26E-05	104657	401516	0	194932	0	0	4.36E-05	1.97E-05	231551	0	0	328123	725662	1786036	0	488288	474827	552904	1454156	1734785	187876	0	593105	907089	0	0	0	1406304
subset:1658	Clinopodium alpinum	atcctgttttctcaaaacaaaggtttcaaaaaacgaaaaaaaaag	0	0	0	0	0	0	0	0	0	0	0	0	0	0	0	0	0	0	0	0	0	0	0	0	0	0	0	0	0	0	0	0	0	0	0	0	0	0	0	0	0	0	0	0	0	0	0
subset:16587	Epilobium 2	atcctattttacgaaaaccagcaccgggggtttagaaagcgatcaaaaaaaag	0	0	0	0	0	0	0	0	0	0	0	0	0	0	0	0	0	0	223047	0	0	0	0	0	0	2.97E-05	1.23E-05	0	0	0	0	7.59E-05	1.85E-05	9.57E-05	6.06E-05	0	143513	6.32E-05	0	0	0	0	0	0	0	0	0
subset:16604	Agrostis	atccgtgttttgagaaaacaaaggggttctcgaatcgaactagaatacaaaggaaaag	0	0	0	0	0	0	0	0	0	0	0	0	0	0	0	591768	760147	0	517391	1043984	0	0	684559	514633	268001	2975156	9.45E-05	107747	181828	0	2.46E-05	7.59E-05	137278	0	0	0	0	0	0	0	0	0	0	0	0	0	0
subset:16665	Erinus alpinus	atcctgtcttctcaaaacaaaggttcaggaagcgaaaaag	0	0	0	0	0	0	0	0	0	0	0	0	0	0	0	0	130812	0	0	481792	190488	0	587459	356227	225467	951103	827835	468641	870462	4.01E-05	2.05E-05	9.42E-05	121842	0	0	0	0	0	0	0	0	0	0	0	0	0	0
subset:16674	Asteraceae 13	atcacgttttccgaaaacaagcaaagattcagaaagcgaaaatcaaaaag	0	0	0	0	0	0	0	0	0	0	0	0	0	0	0	0	0	0	9.74E-05	0	0	0	0	0	0	0	0	0	0	0	0	0	0	0	0	0	0	0	0	0	0	0	0	0	0	0	0
subset:16726	Fabeae 111	atccttctttccgaaaacaaataaaagttcagaaagtgaaaatcaaaaaag	0	0	0	0	0	0	0	0	0	0	0	0	0	0	0	0	0	0	0	0	0	905797	8.51E-05	1077746	549044	2601658	365941	0	0	0	0	0	7.81E-05	0	0	0	0	0	0	0	0	0	0	0	0	0	0
subset:16755	Cerastium cerastoides	ctccttaatagtctcctaaaaaaaacggattcaaaaagaataaaaaag	0	0	0	0	0	0	0	0	0	0	0	0	0	0	0	0	0	0	9.70E-05	0	186125	0	0	0	0	0	1.50E-05	0	0	0	0	0	0	0	0	0	0	0	0	0	0	0	0	0	0	0	0
subset:16768	Carex 1	atcttctttttgagaaaaagaaatatataaaatatttcttatttcagataagaaataatattttttcttatctaatattaaa	0	0	0	0	0	0	0	0	0	0	0	0	0	0	0	352982	809712	301216	116106	0	165735	168691	334225	399193	4.24E-05	115121	9.95E-05	147895	0	337495	2.16E-05	2.53E-05	0	0	112266	0	0	0	0	0	0	1.82E-05	0	0	461282	0	1.99E-05
subset:16812	Hippophae rhamnoides	atccagttttctgattcttaaaacaaacaagggttcagaaagcaatacaaag	0	0	0	0	0	0	0	0	0	0	0	0	0	0	0	0	0	0	0	0	0	0	0	0	0	1.98E-05	9.87E-06	0	0	0	0	0	0	0	0	0	0	0	0	0	0	0	0	0	0	0	0
subset:16991	Gentianella campestris	atcctattaaaatcaaaaaaagcaaaaagaaaggctcagaaagaaaaaaag	0	0	0	0	0	0	0	0	0	0	0	0	0	0	0	8.43E-05	5.16E-05	444559	0	0	0	0	0	0	3.27E-05	933771	5.20E-05	2.44E-05	0	0	3.40E-05	1.52E-05	223982	0	0	0	0	1.48E-05	0	0	0	0	0	4.36E-05	0	0	0
subset:17039	Parentucellia latifolia	atcctgttttctcaaaacaaagattcagaaaacgaaaaaaag	0	0	0	0	0	0	0	0	0	0	0	0	0	0	0	0	0	0	0	0	0	0	0	0	0	0	0	0	0	0	0	0	0	2.51E-05	0	0	0	0	0	0	0	0	0	3.68E-05	0	0	0
subset:17041	Polygonum viviparum	ctcctgctttccaaaaaggaagaataaaaaag	0	0	0	0	0	0	0	0	0	0	0	0	0	0	0	23039602	13406526	36733996	45273671	4188618	25077709	34040522	7351984	18686395	7471352	5721409	3470221	9057846	9472884	3792171	10023702	7272644	7444853	3530611	7378001	4299006	2922729	315607	2870683	0	999035	1098042	566239	213472	4353404	0	2925364
subset:17262	Asteraceae 14	atcacgttttccgaaaacaaataaaggttcagaaagcgaaaatcaaaaag	0	0	0	0	0	0	0	0	0	0	0	0	0	0	0	0	0	0	0	0	0	0	0	0	0	3.96E-05	0	0	0	4.01E-05	0	0	0	0	0	0	0	0	0	0	0	0	0	0	0	0	0
subset:17331	Lilium martagon	atctttattttgaaaaaaagggtttaatttatagtttttttaatataaaactacaataaaaaaa	0	0	0	0	0	0	0	0	0	0	0	0	0	0	0	0	0	0	0	0	0	0	0	0	0	0	0	0	0	0	0	0	0	0	0	0	0	0	0	0	0	0	0	0	0	0	0
subset:17377	Abies alba	atccggttcatagagaaaagggtttctctccttctcctaaggaaagg	0	0	0	0	0	0	0	0	0	0	0	0	0	0	0	1693	0	0	0	0	0	748267	0	0	0	0	3.03E-05	0	0	0	5.23E-05	216556	7.78E-05	8.27E-05	16302	106598	0	0	0	1590331	0	0	3.68E-05	8.34E-05	0	0	7.91E-05
subset:17431	Saxifraga 211	atcctgttttaagaaagcaaaacacaagggttcagaaaaagcgaataaaaaaaag	0	0	0	0	0	0	0	0	0	0	0	0	0	0	0	0	198814	0	0	151753	430133	583917	0	0	1.96E-05	6.76E-05	125026	1.42E-05	120738	5.35E-05	2.84E-05	0	0	166358	0	0	0	0	0	0	2.71E-05	3.03E-05	0	0	5.53E-05	0	1.80E-05
subset:17542	Galium	atcctattttccgaaaacaaagtgaaaagggg	0	0	0	0	0	0	0	0	0	0	0	0	0	0	0	2864426	2363722	3761434	1321154	7497515	12252267	12727719	8150882	10283458	2521588	345118	4646568	4710662	1032856	1522257	112121	457536	266661	1029911	158362	653208	205931	0	8.31E-05	0	1465767	856815	120861	8.19E-05	2108357	0	151101
subset:17624	Veronica	atcctgtcttctaaaaacaaaggttcaggaagtgaaaaaggg	0	0	0	0	0	0	0	0	0	0	0	0	0	0	0	1525342	217318	4228362	0	1167393	1955441	16657993	1293383	1023061	2995283	15176803	2380747	11446735	6720539	9212476	58080935	26572463	3131274	6375549	5322748	11153609	2664517	5251635	3491702	0	5829494	1429219	4367449	3169344	0	0	512912
subset:17662	Amblystegiaceae	atcttatttccttttgtttgaggataa	0	0	0	0	0	0	0	0	0	0	0	0	0	0	0	0	0	0	0	0	0	0	0	0	0	0	0	0	0	0	0	0	0	0	0	0	0	0	0	0	0	0	0	0	0	0	0
subset:17765	Rorippa	atccttgtttacgcgaacaaaccccggtttagaaagcgagaaaaaagg	0	0	0	0	0	0	0	0	0	0	0	0	0	0	0	0	0	0	0	0	0	0	0	0	0	0	0	0	0	0	0	0	0	0	111742	0	0	8.90E-05	334835	0	0	0	0	0	0	0	0
subset:17933	Crepis rhaetica	atcacgttttccgaaaacaaacaaagattcagaaagcgaaaataaaaaag	0	0	0	0	0	0	0	0	0	0	0	0	0	0	0	0	0	0	0	0	0	0	0	0	0	0	0	0	5.89E-05	183187	0	0	0	140333	0	0	0	0	6.58E-05	0	0	0	0	0	1052586	0	0
subset:17936	Anthemideae	atcacgttttccgaaaacaaacaaaggttcaaaaagcgaaaagaaaaaaaa	0	0	0	0	0	0	0	0	0	0	0	0	0	0	0	0	0	0	0	0	0	0	0	0	0	0	0	0	0	0	0	0	0	0	0	0	0	0	0	0	0	0	0	0	0	0	0
subset:17951	Crepis biennis	atcacgttttccgaaaataaacaaagattcagaaagcgaaaatcaaaaag	0	0	0	0	0	0	0	0	0	0	0	0	0	0	0	0	0	0	0	0	0	0	0	0	0	0	0	0	3.48E-05	0	0	0	0	0	0	0	0	0	0	0	0	0	0	0	0	0	0
subset:17953	Moehringia muscosa	ctccttttgtctcctttttcaaaagaaaaaaaaag	0	0	0	0	0	0	0	0	0	0	0	0	0	0	0	0	0	0	0	0	0	0	0	0	0	0	0	0	0	0	0	0	0	0	0	0	0	0	0	0	0	0	0	0	0	0	0
subset:18039	Eryngium	atcctgttttccaaaaacaaacaaaggttcagaaggtgaaaagg	0	0	0	0	0	0	0	0	0	0	0	0	0	0	0	0	1.99E-05	0	0	0	0	0	0	0	0	2.38E-05	0	0	0	0	0	0	0	0	0	0	0	0	0	0	0	0	0	0	0	0	0
subset:18106	Lysimachia nemorum	atcctctttttcgaaaacaaagagttaaaggaaaataaaaaagggg	0	0	0	0	0	0	0	0	0	0	0	0	0	0	0	0	0	0	0	0	0	0	331698	0	5.65E-05	0	7.40E-06	0	0	0	0	0	0	3.15E-05	0	0	0	0	0	0	0	0	0	0	0	0	0
subset:18205	Ajuga	atcctgttttctcaaaacaaagattcaaaaaacgaaaaaagg	0	0	0	0	0	0	0	0	0	0	0	0	0	0	0	2774726	5615252	629473	0	52067	4891302	0	7213599	1561676	4654164	4964773	4089838	12524875	1621148	8590729	2275168	19263459	6628682	27478844	6173846	765682	253441	2491712	1635169	0	1640799	857295	7908394	216408	1925355	0	859848
subset:18237	Lotus	atcctgctttacgaaaacaagggaaagttcagttaagaaagcgacgagaaaaatg	0	0	0	0	0	0	0	0	0	0	0	0	0	0	0	9153392	6347214	11913125	10969221	8219326	9573666	22593323	6995037	7034609	6253844	2848371	1344758	1494571	2722703	1274289	101655	2053876	3100237	2851847	3036321	1382673	758103	596553	866797	0	528173	126028	331634	8.01E-05	0	0	260033
subset:18287	Hedysarum hedysaroides 111	atcctgctttccgaaaacaaacaaataaaagttcagcaaagtaaaaataaaaaaaag	0	0	0	0	0	0	0	0	0	0	0	0	0	0	0	2917933	3712729	7122231	2504725	1750593	1703081	2468924	2631223	1809445	52759	835655	497935	607747	1674963	796438	3181519	2330326	105365	1311199	9276194	4189882	7642152	2917038	3732465	2544529	653422	3742472	152627	366956	3407573	0	713793
subset:18362	Saxifraga exarata	atcctgttttaagaaagcaaaacacaagggttcagaaaaagaaaaaaaaaaag	0	0	0	0	0	0	0	0	0	0	0	0	0	0	0	0	0	0	0	0	0	0	0	0	0	0	0	0	1.39E-05	0	0	0	0	0	0	0	0	0	0	0	0	0	0	0	0	0	9.00E-06
subset:18488	Androsace chamaejasme	atcctctttttagaaaacaaagattaaaggaaaataaaataaaaaaggggcg	0	0	0	0	0	0	0	0	0	0	0	0	0	0	0	0	0	0	0	0	0	0	0	0	0	5.78E-05	1.47E-05	0	1.39E-05	0	0	0	0	0	0	0	0	0	0	0	0	0	0	0	0	0	0
subset:18537	Cosmarium botrytis	atcctagaagtaaaaactttatag	0	0	0	0	0	0	0	0	0	0	0	0	0	0	0	0	5.35E-05	10329	0	1030204	0	0	0	1471139	0	0	0	0	0	0	0	0	0	0	0	0	0	0	0	0	0	0	0	0	0	0	0
subset:18563	Ranunculus 2111	atcctgctttcagaaagcaaaaaaagg	0	0	0	0	0	0	0	0	0	0	0	0	0	0	0	4392422	3297261	8891086	5020514	13598043	2819501	7997384	322181	4060883	3612959	158398	530883	222828	4187352	8138757	14672946	12719347	13419988	5344722	1022151	11123281	25385177	14028699	28604167	18816351	17015402	6294236	13562749	1987646	20087614	0	20243845
subset:18929	Asteraceae 411	atcacgttttccgaaaacaaacaaaggttcagaaagcgaaaataaaaaag	0	0	0	0	0	0	0	0	0	0	0	0	0	0	0	71683292	3467941	27821117	7615964	13298795	35792267	8854922	5684092	6160419	9723567	2994627	4232915	7360365	9558069	32977352	39092654	14379008	17131104	8692292	9033774	16316557	20227093	20822653	15669959	24408573	36267618	70406744	5181937	7219218	35068512	0	26825328
subset:19238	Saxifraga rosacea	atcctgttttaagaaagcaaaacacaagggttcagaaaaagaaaaaaaaag	0	0	0	0	0	0	0	0	0	0	0	0	0	0	0	0	0	0	1.80E-05	0	0	0	0	0	0	0	0	0	0	0	0	0	0	0	1.61E-05	0	0	0	0	0	0	0	0	0	0	0	0
subset:19257	Bupleurum stellatum	atcctattttccaaaaacaaacaaaggcccagaaagtgaaaaaag	0	0	0	0	0	0	0	0	0	0	0	0	0	0	0	0	0	0	0	0	0	0	0	0	0	0	0	0	0	0	0	3.95E-05	0	0	0	0	0	0	0	0	0	0	0	0	0	0	0
subset:19302	Poa	atccgtgttttgagaaaataagggggttctcgaactagaatacaaaggaaaag	0	0	0	0	0	0	0	0	0	0	0	0	0	0	0	0	0	0	0	0	0	0	0	0	0	0	0	0	0	0	0	2.37E-05	0	0	0	2.49E-05	0	0	0	0	0	0	5.99E-05	0	0	0	0
subset:19506	Gypsophila repens	ctccttttgtttccttttttcaaaagaaaaaaaaaaggattaagaaagcaagaataaaaaag	0	0	0	0	0	0	0	0	0	0	0	0	0	0	0	0	1.32E-05	0	0	0	0	0	0	0	0	0	0	0	0	0	0	0	0	3.48E-05	0	0	0	0	0	0	0	0	0	0	0	0	0
subset:19724	Ranunculus 1	atcctgctttcagaaaacaaaaagggggggttcagaaagaaaaaaagg	0	0	0	0	0	0	0	0	0	0	0	0	0	0	0	13892378	2927491	14049787	38367269	57357366	395698	2998951	2347186	7629504	20134275	5026	196453	690528	16230845	24794067	12917146	33407096	3063178	66359177	124565784	56861917	38971975	27038923	14219825	4596272	2703023	15611135	29565844	2346773	3396463	0	3993159
subset:19727	Arctostaphylos uva-ursi 111	atcttttttttttttcgaaaataaagaaagattcagaaagcgaaaaaaaag	0	0	0	0	0	0	0	0	0	0	0	0	0	0	0	0	233701	0	695263	9.16E-05	326691	0	334225	0	4.58E-05	124919	113597	9.62E-05	7.59E-05	6.69E-05	457765	701824	36117	1796939	562967	385225	367652	593331	176627	0	2.84E-05	5.87E-05	2.80E-05	4.14E-05	0	0	7.64E-05
subset:19736	Primula 1	atcctctttttagaaaacaaaggttaaaggaaaagaaaagggg	0	0	0	0	0	0	0	0	0	0	0	0	0	0	0	109778	0	0	66572	476438	986622	691563	0	0	278429	191506	6.54E-05	7.56E-05	2.77E-05	1097474	2599726	4342146	1166027	8.27E-05	5340867	1538831	6208283	2974707	3474097	3650183	155923	0	1731295	219496	0	0	4737819
subset:19747	Gentiana 2	atcctagttttcgaaaaagcaaaaagaaaggcttagaaagaaatgaaagaaataaag	0	0	0	0	0	0	0	0	0	0	0	0	0	0	0	0	278099	0	580921	220765	216963	0	0	640807	344451	1758356	691252	475056	5.14E-05	103482	163374	5.53E-05	0	9.79E-05	0	104578	0	2.47E-05	0	0	0	0	0	0	0	0	139206
subset:19778	Achillea atrata	atcacgttttccgaaaacaaacaaaggttcagaaagcgaaaagaaaaaaaaa	0	0	0	0	0	0	0	0	0	0	0	0	0	0	0	0	0	989954	175365	1418069	0	0	127627	197239	110011	0	0	0	0	0	0	3.95E-05	0	0	0	0	4.07E-05	3.45E-05	0	0	0	34459	9.49E-05	1.24E-05	644441	0	2825403
subset:19924	Tozzia alpina	atcctgttttctcaaaacaaagattcagaaaacgaaaaaaaag	0	0	0	0	0	0	0	0	0	0	0	0	0	0	0	0	0	0	0	0	0	0	0	0	0	0	0	0	0	0	0	0	3.24E-05	0	0	0	892413	1190781	3746222	0	1878032	4218136	0	2620555	0	0	0
subset:2000	Rubus	atcctgttttatgaaaacaaacaagggtttcagaaagcgagaataaataaag	0	0	0	0	0	0	0	0	0	0	0	0	0	0	0	0	0	0	0	111643	0	0	228102	0	0	0	0	6.78E-05	0	0	205138	191607	3.01E-05	118483	425963	54286	702958	514847	1252535	0	0	0	9.42E-05	4.73E-05	1481043	0	0
subset:20083	Ranunculus parviflorus	atcctgctttcagaaaacaaaaagagggttcagaaagcaaaaaaagg	0	0	0	0	0	0	0	0	0	0	0	0	0	0	0	776619	1846853	0	616138	1034129	1390837	1889169	773329	1110552	0	127127	664686	1287173	2613277	285864	5.17E-05	0	366694	0	0	0	0	0	0	0	104041	0	0	5.38E-05	0	0	9.00E-06
subset:20144	Grimmiaceae	atcttatttcaaaaaaaa	0	0	0	0	0	0	0	0	0	0	0	0	0	0	0	0	0	0	0	0	3.28E-05	0	0	0	0	0	0	0	0	0	0	0	0	0	0	0	0	0	0	0	0	0	0	0	0	0	0
subset:20257	Maleae 111	atcctgttttatgaaaataaacaagggtttcataaaccgaaaataaaaaag	0	0	0	0	0	0	0	0	0	0	0	0	0	0	0	0	2.11E-05	0	12986	0	107653	0	0	224171	0	0	0	0	4.46E-05	5.35E-05	588782	250913	3.05E-05	1153285	323277	240944	1729544	1422091	1414532	3962274	402311	1688056	582347	2278043	7671274	0	166377
subset:2031	Potentilla 2111	atcccgttttatgaaaacaaacaggggtttcataaagcgagaataaataaag	0	0	0	0	0	0	0	0	0	0	0	0	0	0	0	0	0	0	0	0	0	0	0	0	0	0	0	0	0	163549	606938	869415	0	3.54E-05	727032	192259	0	0	0	0	0	0	0	0	0	0	0
subset:20383	Potentilla 111	atcccgttttatgaaaacaaacaaaggtttcagaaaccgagaataaataaag	0	0	0	0	0	0	0	0	0	0	0	0	0	0	0	440314	254578	382555	4166	258799	0	0	9.57E-05	4.47E-05	1.96E-05	5.66E-05	107524	5.19E-05	0	6.66E-05	1.23E-05	174705	221999	134048	7.12E-05	0	334937	115179	140146	0	0	0	0	0	0	0	0
subset:20388	Lonicera caerulea	atccagttttccgaaaacaagggtttagaaagcaaaaatcaaaaag	0	0	0	0	0	0	0	0	0	0	0	0	0	0	0	0	0	0	0	0	0	0	0	0	0	0	0	0	0	0	0	0	0	0	6.83E-05	95484	667561	10364	411069	0	218625	0	1351036	4.51E-05	1136014	0	0
subset:20479	Euphorbia sect. Esula	atcctagtttccgaaaacaaaaaaagttccataaagacagaaaaaaag	0	0	0	0	0	0	0	0	0	0	0	0	0	0	0	225734	693821	4518603	1996618	705358	97875	4943287	1945859	2739923	2490859	5003898	1132664	1411562	403114	5.35E-05	939274	232812	3.05E-05	236967	44301	33299	0	11954	0	0	0	610249	137148	0	0	0	679938
subset:20567	Pritzelago alpina	atcctgggttacgcgaacaaaccggagtttcgaaagcgagaaaaaagg	0	0	0	0	0	0	0	0	0	0	0	0	0	0	0	0	0	0	0	0	0	0	0	0	0	0	0	0	0	0	0	0	0	0	0	0	4.07E-05	0	0	0	0	0	0	0	0	0	0
subset:20578	Convolvulus arvensis	atcctgttttccgaaaacaaacaaaagttcagaaaaaag	0	0	0	0	0	0	0	0	0	0	0	0	0	0	0	0	0	0	0	0	0	0	0	0	0	8.23E-06	0	2.93E-05	0	0	4.33E-05	0	1.62E-05	0	0	0	0	0	0	0	0	0	0	0	0	0	0
subset:20594	Apioideae 4	atcctatttttcaaaaacaaacaaaggcccagaaggtgaaaaaag	0	0	0	0	0	0	0	0	0	0	0	0	0	0	0	0	0	0	0	0	0	0	0	0	0	0	0	0	0	0	0	0	0	0	0	0	0	0	0	0	0	0	0	0	0	0	0
subset:20712	Erica carnea 111	atcctttttttcgcaaacaaacaaagattccgaaagctaaaaaaaag	0	0	0	0	0	0	0	0	0	0	0	0	0	0	0	13420486	10754068	15131577	3969859	1050589	21591215	15163511	20942677	13988573	6097475	8056916	2434457	11485301	4250913	7752476	1715458	98461	3538658	3655287	1110958	1257639	1583365	1007226	1137592	1329388	2395854	4912379	352321	185471	1208494	0	4.60E-05
subset:20789	Asteraceae 5	atcacgttttccgaaaacaaacaaaggttcagaaagcgaaaaaaaaaa	0	0	0	0	0	0	0	0	0	0	0	0	0	0	0	0	0	0	0	0	0	0	0	0	0	0	0	0	0	0	0	0	0	0	0	0	0	0	0	0	0	0	0	0	0	0	0
subset:20862	Athyrium distentifolium	atcttgtattattcagatgaatttcgggcgatgaggcga	0	0	0	0	0	0	0	0	0	0	0	0	0	0	0	591842	0	444559	0	0	0	118147	0	0	0	0	0	0	136761	0	0	2397898	3.05E-05	2840909	4.03E-05	949947	0	0	0	0	0	2877612	206208	124539	872873	0	4.60E-05
subset:21069	Euphrasia 2	atcctgtttgttttttccaaacaaagattcagaaaacgaaaaaaag	0	0	0	0	0	0	0	0	0	0	0	0	0	0	0	410157	1569774	420453	1866069	4899962	10921	0	1865467	1273329	111358	2394722	1941926	3755926	934442	137981	586708	5.23E-05	1088147	2183802	1069714	449999	149116	211867	9.78E-05	0	389799	1618645	0	1.65E-05	0	0	3.46E-05
subset:21084	Leontodon	atcacgttttccgaaaacacacaaaggttcagaaagcgaaaataaaaaag	0	0	0	0	0	0	0	0	0	0	0	0	0	0	0	0	176431	279642	313559	848656	0	1381106	0	800862	165017	668102	4.78E-05	523406	537158	216493	2824466	3455171	1728512	1271417	189002	226655	375818	642054	724166	0	0	0	1544626	184185	0	0	0
subset:2111	Achillea macrophylla	atcacgttaagcgaaaagaaaaaaaa	0	0	0	0	0	0	0	0	0	0	0	0	0	0	0	0	0	0	0	129938	0	0	0	0	0	0	0	0	103172	0	0	0	24694	340187	1.81E-05	0	165625	395783	795806	1945525	141483	0	188327	5.40E-05	0	0	0
subset:21260	Trifolium 2	atccttctttccgaaaacaaaataaaagttcagaaagttaaaataaaaaagg	0	0	0	0	0	0	0	0	0	0	0	0	0	0	0	0	614882	1949564	167091	2214497	24982	1109409	573633	1995754	1515983	1579169	761628	135792	899044	376692	51124	139493	652563	691951	855282	0	0	228346	0	0	0	0	0	0	0	0	0
subset:21543	Alnus	atcctgttttccgaaaacaaataaaacaaattgaagggttcataaagcgagactaaaaaag	0	0	0	0	0	0	0	0	0	0	0	0	0	0	0	0	0	0	0	0	0	0	0	2.24E-05	0	186897	0	8.82E-05	5.89E-05	0	0	7.12E-05	9.79E-05	0	0	0	191424	0	0	0	0	0	0	0	0	0	0
subset:21590	Sanicula europaea	atcctgttttccaaaaacaaacaaaggttcagaaggtgaaaaag	0	0	0	0	0	0	0	0	0	0	0	0	0	0	0	0	0	0	0	0	0	0	0	0	0	0	0	0	0	0	0	0	0	0	0	0	0	0	0	0	0	0	0	0	0	0	0
subset:21689	Euphyllophyta	atcttgtcttactcaaatgaatttcgggcgatgaggcga	0	0	0	0	0	0	0	0	0	0	0	0	0	0	0	0	0	0	0	0	0	0	0	197239	0	0	0	1.96E-05	0	4.01E-05	5.68E-05	9.83E-05	189701	0	175175	6.94E-05	0	154313	4.07E-05	0	0	422575	9.06E-05	0	0	0	1.48E-05
subset:21964	Ranunculus 5	atcctgctttcagaaaacaaaaaggggggttcagaaagcaaaaatagg	0	0	0	0	0	0	0	0	0	0	0	0	0	0	0	0	9.38E-05	0	407941	1074352	8.46E-05	0	579984	0	0	0	7.40E-06	0	0	6.66E-05	1.62E-05	0	3.77E-05	0	3.98E-05	0	0	1.48E-05	0	0	0	0	0	4.14E-05	0	0	1.80E-05
subset:22009	Allium victorialis	atctttattttttgaaaaacaaacaagggtttcaaaaagagaataaaaaag	0	0	0	0	0	0	0	0	0	0	0	0	0	0	0	0	0	0	0	0	0	0	0	0	0	0	0	0	0	0	0	0	0	0	0	0	0	0	0	0	0	0	0	0	0	0	0
subset:22295	Ziziphora capitata	atcctgttttctcaaaacaaaggtttcaaaaaacgaaaaaaaag	0	0	0	0	0	0	0	0	0	0	0	0	0	0	0	0	7.22E-05	0	0	1996783	0	0	1880295	1663176	1343484	1039602	588204	1578482	395023	536913	2085045	1247971	548881	230636	593448	136308	0	0	0	0	0	0	0	0	0	0	0
subset:22360	Kalmia procumbens	atcctgttttttgcaaacaaacaaagattccgaaagcaaaaaaaaaaag	0	0	0	0	0	0	0	0	0	0	0	0	0	0	0	0	115998	153022	339842	0	102684	0	0	119232	7.06E-05	6.54E-05	0	5.41E-05	2.40E-05	0	0	6.67E-05	0	0	6.05E-06	0	0	0	1.96E-05	0	0	0	0	0	0	0	162076
subset:22438	Asplenium trichomanes 2	atccagtattacttgaataaaattcaatgaatttcaatcgatgagacga	0	0	0	0	0	0	0	0	0	0	0	0	0	0	0	0	0	0	0	0	0	0	0	0	0	0	0	0	0	0	0	0	0	0	0	0	0	0	0	0	0	0	0	0	0	0	0
subset:22450	campanulids 2	atcacgttttttgaaaacaaacaaaggttcagaaagcgaaaataaaaaag	0	0	0	0	0	0	0	0	0	0	0	0	0	0	0	0	0	0	0	0	0	0	0	0	0	0	0	0	0	0	0	0	0	0	0	0	0	0	0	0	0	0	0	0	0	0	5.61E-05
subset:22528	Leucanthemopsis alpina	atcacgttttccgaaaaaacgttcagaaagcgaaaagaaaaaaaa	0	0	0	0	0	0	0	0	0	0	0	0	0	0	0	0	3.96E-05	943961	672774	436565	179876	0	0	0	3.93E-05	0	7.57E-06	0	216842	0	0	0	0	0	0	0	0	0	0	0	0	0	1.40E-05	0	0	0	0
subset:22532	Acer 2	atcctgttttacgagaataaaacaaagcaaacaagggttcagaaagcgagaaaggg	0	0	0	0	0	0	0	0	0	0	0	0	0	0	0	0	0	0	0	0	0	0	0	3.73E-05	0	0	0	0	0	0	1.64E-05	0	2.31E-05	220222	0	8.88E-05	0	5.94E-05	6.58E-05	0	3.78E-05	0	0	0	0	0	0
subset:22625	Lamioideae	atcctgttttttcaaaacaaaggttcaaaaaacgaaataaag	0	0	0	0	0	0	0	0	0	0	0	0	0	0	0	0	0	0	0	0	0	0	0	0	0	0	0	0	0	0	0	0	1.80E-05	1.33E-05	0	6.57E-05	0	9.49E-05	0	0	0	0	0	0	151906	0	0
subset:22720	Asplenium 2	atccagtattacttgactaaattccaatgaatttaaggcgatgagacga	0	0	0	0	0	0	0	0	0	0	0	0	0	0	0	0	0	0	0	0	0	0	0	0	0	0	0	0	0	0	0	0	0	0	0	0	0	0	0	0	0	0	0	0	0	0	0
subset:22727	Trifolium 3	atccttctttccgaaaacaaataaaagttcagaaagggaaaataaaaaaag	0	0	0	0	0	0	0	0	0	0	0	0	0	0	0	1180904	542643	252943	715085	496547	212882	743163	303767	0	3.93E-05	0	0	6.63E-05	273541	187037	966153	63279	144825	0	165518	242891	378022	629855	6.03E-05	0	3.39E-05	4.05E-05	581677	2.70E-05	0	0	287819
subset:2273	Calluna vulgaris 111	atcctttttttcgcaaacaaacaaagattccgaaaggtaaaaaaaag	0	0	0	0	0	0	0	0	0	0	0	0	0	0	0	957419	336352	2408981	621799	662293	795849	1843889	1144113	556237	1244786	109746	241599	9.29E-05	1277887	120424	0	0	4.62E-05	0	0	0	0	4.16E-05	0	0	0	0	0	0	0	0	0
subset:22736	Dicranidae	attttatattttaaaaataa	0	0	0	0	0	0	0	0	0	0	0	0	0	0	0	0	0	0	0	0	0	0	0	0	0	0	0	0	0	0	0	0	0	0	0	0	0	0	0	0	0	0	0	0	0	0	0
subset:22921	Prunella	atcctgttttctcaaaacaaaggttcaaaaaacgaaaaaaagg	0	0	0	0	0	0	0	0	0	0	0	0	0	0	0	14486246	12760499	8729004	12384915	1060987	10561173	18171097	17194328	24560344	755397	6007451	16949103	46633767	18203978	19707925	1323345	1046571	9529842	8382879	10511739	159953	0	102752	0	0	2.71E-05	0	0	5.46E-05	225384	0	0
subset:22958	Bistorta officinalis	ctcctgctttacaaaaaggaagaataaaaaag	0	0	0	0	0	0	0	0	0	0	0	0	0	0	0	3386	105026	1295693	0	692947	0	0	223347	134747	209556	5.81E-05	0	0	683001	160276	1602202	2546045	120099	1164559	3627365	2579877	7919315	6528509	18097327	12070392	208743	5637117	3438426	133426	0	0	0
subset:23004	Polygala chamaebuxus	atcccactttccgaaaaaaaaaaataaagacgggttcggcacgaaaaaaagag	0	0	0	0	0	0	0	0	0	0	0	0	0	0	0	5.06E-05	166668	0	2.25E-05	0	572045	0	0	0	6.85E-05	8.23E-06	4.02E-05	2.48E-05	2.06E-05	0	0	0	0	0	0	0	0	0	0	0	5.42E-05	0	0	0	0	0	0
subset:23006	Crocoideae	atctttattttgagaaaacaaaaactagaataaaaaaag	0	0	0	0	0	0	0	0	0	0	0	0	0	0	0	0	2.98E-05	0	0	0	9.83E-05	0	0	0	0	0	0	1.42E-05	0	0	0	0	0	0	8.06E-06	0	0	0	0	0	0	0	0	0	0	0	0
subset:23122	Clinopodium	atcctgttttctcaaaatcaaaacaaaagtttcaaaaaacgaaaaaag	0	0	0	0	0	0	0	0	0	0	0	0	0	0	0	0	1.32E-05	0	0	0	0	0	0	3.73E-05	0	0	0	0	0	0	0	0	186916	0	3.15E-05	7.93E-05	0	0	0	0	0	0	0	0	0	0	0
subset:23197	Poinae	atccgtgttttgagaagggggttctcgaactagaatacaaaggaaaag	0	0	0	0	0	0	0	0	0	0	0	0	0	0	0	2643735	794701	3541712	9.90E-05	216563	0	203688	382881	72638	9447805	751039	3.26E-05	282684	254649	549383	387587	789825	1029798	69655	320091	151642	0	4905	109726	0	0	242084	150249	0	0	0	505924
subset:23279	Valeriana 211	atccggtttttgttttccgaaaacaaacaaaggctaaaatcaaaaaag	0	0	0	0	0	0	0	0	0	0	0	0	0	0	0	0	0	0	0	0	0	0	0	0	0	0	0	0	0	0	8.27E-05	0	1.50E-05	0	0	1.87E-05	0	118842	322342	0	0	0	0	151261	1651982	0	46062
subset:23394	campanulids 1	atcatgttttccgaaaacaaacaaaggttcagaaagcgaaaataaaaaag	0	0	0	0	0	0	0	0	0	0	0	0	0	0	0	0	0	0	0	0	0	0	0	0	0	0	0	0	0	0	0	0	0	0	0	0	0	0	0	0	0	0	0	0	740521	0	0
subset:23426	Carlina acaulis subsp. Caulescens 111	atcacgttttccgaaaacaaacaaaggttcagaaagcaaaaataaaaaag	0	0	0	0	0	0	0	0	0	0	0	0	0	0	0	9939067	25136231	7397858	371745	3091274	128901	389149	1956539	2492051	1758984	2526833	1022493	1281483	0	1404497	19401772	483844	770118	1282268	339426	226655	0	0	0	0	0	0	8.04E-05	9.68E-05	0	0	0
subset:23456	Sagina	ctcctttttttgtctccctttttcaaaagacaaaaaggattcagaaagcaagaataaaacag	0	0	0	0	0	0	0	0	0	0	0	0	0	0	0	0	199331	0	0	0	103181	0	0	0	0	5.28E-05	9.81E-06	0	13058	0	0	0	0	0	0	0	0	0	0	0	0	0	3.42E-05	0	0	0	0
subset:23464	Globularia cordifolia	atcctgttttctcagaacaaagattcaaaaagcgaaaaagg	0	0	0	0	0	0	0	0	0	0	0	0	0	0	0	219555	589426	3150042	526908	3545462	87989	2778461	756831	2572694	1550125	1179396	727567	241605	785173	2245567	143755	26322	1266748	428751	201739	169991	0	0	6.58E-05	0	0	497791	3.02E-05	0	0	0	0
subset:23492	Asteraceae 1	atcacattttccgaaaacaaacaaaggttcagaaagcgaaaatcaaaaag	0	0	0	0	0	0	0	0	0	0	0	0	0	0	0	0	0	0	0	0	0	0	0	0	0	0	0	0	0	0	0	0	0	0	0	0	0	0	0	0	0	0	0	0	0	0	0
subset:23569	Anemone	atccttatttcagaaaacaaaagagggttcagaaagcaagaataaaaaaag	0	0	0	0	0	0	0	0	0	0	0	0	0	0	0	0	202488	30783	542063	100733	0	0	0	0	4.24E-05	1.19E-05	2.21E-05	1.77E-05	3.43E-05	8.33E-05	100468	0	4.39E-05	223513	245366	0	43146	407272	414362	0	311724	533159	172089	115938	0	0	1396847
subset:2364	Juncus 1	atctttattttgagataattggtttttatataaaaacgaaaatcaaaaaa	0	0	0	0	0	0	0	0	0	0	0	0	0	0	0	6.74E-05	206683	0	0	0	0	0	0	0	0	1.59E-05	0	0	2.40E-05	0	1.62E-05	0	0	153259	0	0	4.07E-05	1.97E-05	0	0	0	0	0	0	0	0	1.99E-05
subset:23843	Thesium alpinum	atccggttttacgaaaatgcatgtggtaggggcttatgaaaacgataatcgaataaaaaag	0	0	0	0	0	0	0	0	0	0	0	0	0	0	0	0	0	0	0	0	0	0	0	0	0	0	0	0	0	0	0	3.45E-05	0	0	5.89E-05	0	0	0	0	0	0	0	0	0	0	0	0
subset:23876	Betulaceae	atcctgttttcccaaaacaaataaaacaaatttaagggttcataaagcgagaataaaaaag	0	0	0	0	0	0	0	0	0	0	0	0	0	0	0	0	0	315179	0	0	4.95E-05	0	0	0	135016	140333	9.87E-06	5.68E-05	393802	5.35E-05	6.56E-05	352705	6.88E-05	2096755	878479	0	0	7.91E-05	5.43E-05	0	0	0	5.04E-05	0	0	0	0
subset:23904	Rubus idaeus	atcctgttttatgaaaacaaacaagggtttcagaaagcgaaaataaataaag	0	0	0	0	0	0	0	0	0	0	0	0	0	0	0	0	0	0	0	0	222236	0	0	0	0	0	0	0	0	0	0	0	0	0	0	0	0	0	0	0	0	0	0	0	0	0	0
subset:23937	Chara	gtctgattcgattcagtttaataatcaataaggtattattggagtttca	0	0	0	0	0	0	0	0	0	0	0	0	0	0	0	13798671	0	586671	0	0	0	0	0	0	0	0	0	0	0	0	0	0	0	0	0	0	0	2.47E-05	0	944584	106112	0	0	0	0	0	0
subset:24055	Polystichum	atctttgattaatcaaatgaatttcgggcgatgaggcga	0	0	0	0	0	0	0	0	0	0	0	0	0	0	0	0	0	0	0	0	0	0	0	0	0	0	0	0	0	0	0	0	0	0	0	0	0	0	0	0	0	0	0	0	0	0	0
subset:24336	Dicranidae	atcttatttttaaaataa	0	0	0	0	0	0	0	0	0	0	0	0	0	0	0	0	0	0	0	0	0	0	0	0	0	0	0	0	0	0	0	0	0	0	0	0	0	0	0	0	0	0	0	0	0	0	0
subset:24362	Juncus 2	atctttattttgagaaaattggtttttatagaaaaactcaaatcaaaaaa	0	0	0	0	0	0	0	0	0	0	0	0	0	0	0	0	0	0	0	0	0	0	0	0	0	0	0	0	0	0	0	0	0	0	0	0	0	0	2.29E-05	0	0	0	0	0	0	0	0
subset:24372	Stuckenia 111	atccctgttttgagaaaaaagggtttattttctatatttcgaattttctattatatagaaattcaaaaataagaatttaaaaaagg	0	0	0	0	0	0	0	0	0	0	0	0	0	0	0	0	2.98E-05	252143	19387829	31176194	0	1876688	83619	2133646	1244496	307031	17958	6959181	71036697	16581615	168952913	224212418	25083351	80779492	131075649	13423343	55399624	217861838	43954552	101394	2732279	2385153	5897047	4778139	6485995	15829395	2526747
subset:24469	Saxifraga stellaris	atcctgttttctaaaaaaaagg	0	0	0	0	0	0	0	0	0	0	0	0	0	0	0	0	0	0	8.16E-05	176052	0	0	0	0	0	4.36E-05	9.81E-06	4.57E-05	1.03E-05	0	0	0	0	0	0	0	0	0	0	0	0	0	0	0	0	0	323658
subset:24505	Chaerophyllum	atcctattttttccaaaaacaaaaaggcccagaaggtgaaaaag	0	0	0	0	0	0	0	0	0	0	0	0	0	0	0	907891	232897	250961	1356392	534033	9.23E-05	0	853557	1265466	885016	1243318	1262302	88031	1640482	7738357	20350021	13860366	3347291	4127812	13107693	33659861	66814819	65614599	62205464	66693821	70803919	6278983	56515402	38028539	107603405	15243902	85615466
subset:24508	Polytrichaceae	atcttattctaaaatga	0	0	0	0	0	0	0	0	0	0	0	0	0	0	0	0	0	1.30E-05	0	235047	0	0	0	197239	0	8.59E-05	0	2.83E-05	0	0	0	3.16E-05	1.39E-05	0	1.89E-05	0	0	0	0	0	0	0	0	0	0	0	6.46E-05
subset:2453	Athyrium filix-femina	atcttgtattattcggatgaatttcgggcgatgaggcga	0	0	0	0	0	0	0	0	0	0	0	0	0	0	0	0	25868	0	0	0	0	0	0	0	0	0	0	0	0	0	0	956875	0	4.43E-05	0	0	0	3.45E-05	322852	0	0	0	0	9.86E-05	0	0	1198479
subset:24562	Onobrychis	atcctgaaacaaataaaagttcagaaagtgaaaataaaaaaag	0	0	0	0	0	0	0	0	0	0	0	0	0	0	0	10132123	16084622	3703722	1616425	2272715	3189411	2597298	1225847	1369669	19392	938165	407049	954157	786374	3249515	3390948	2493341	2845819	742235	5848969	3031468	4028346	3640901	3768761	0	4654311	6397151	882084	450024	2684115	0	410081
subset:24797	Knautia 111	atcctgttttccgaaaacaaacaagggttcagaaagctaaaatcaaaaagaaaaaaag	0	0	0	0	0	0	0	0	0	0	0	0	0	0	0	0	0	0	0	0	0	0	0	0	0	0	0	1.96E-05	4.16E-05	173657	5.72E-05	6.16E-05	282765	153553	7.81E-05	764258	3501441	8596598	2359294	0	2225523	3279453	22949	461289	8790205	0	7808877
subset:248	Asplenium trichomanes 1	atccagtattacttgaagaaaattcaatgaatttcaatcgatgagacga	0	0	0	0	0	0	0	0	0	0	0	0	0	0	0	0	0	0	0	0	0	0	0	0	0	0	0	0	0	0	0	0	0	0	0	0	0	0	0	0	0	0	0	0	0	0	0
subset:24801	Saxifraga 5	atcctgttttaagaaagcaaaacacaagggttcagaaaaagtaaaaaaaaaaaaag	0	0	0	0	0	0	0	0	0	0	0	0	0	0	0	0	0	0	0	3.66E-05	4.61E-05	0	0	0	0	0	0	1.42E-05	0	0	0	0	0	0	0	0	0	0	0	0	0	0	0	0	0	0	1.48E-05
subset:24970	Calamagrostis	atccatgttttgagaaaacaaaggggttctcgaatcgaactagaatacaaaggaaaag	0	0	0	0	0	0	0	0	0	0	0	0	0	0	0	31224	0	0	0	0	0	0	0	0	9.88E-05	115329	221346	9.71E-05	180159	0	192754	2.02E-05	1.39E-05	0	117739	190013	4.07E-05	2.96E-05	38647	0	8.86E-05	0	0	4.54E-05	0	0	1.99E-05
subset:25052	Pinus	atccggttcatgaagacaatgtttcttctcctaagataggaaggg	0	0	0	0	0	0	0	0	0	0.25	0	0	0	0	1258595	0	797943	0	0	3806635	0	1337693	159534	3.73E-05	0	0	0	0	371342	43153069	1619322	481221	1573603	13041233	4058539	51491972	61134161	81671437	8423816	77401353	104130761	197500313	15180468	767115803	203750869	368097976	9303509
subset:25283	Ranunculus glacialis	atcctgctttcagaaaacaaaaaggggagttcagaaagcaaaaatagg	0	0	0	0	0	0	0	0	0	0	0	0	0	0	0	0	0	0	1.94E-05	1.98E-05	0	0	0	0	0	0	0	0	0	0	0	0	0	0	1.89E-05	0	0	0	0	0	0	0	0	0	0	0	0
subset:25603	Apioideae 111	atcctattttccaaaaacaaacaaaggcccagaaggtgaaaaaag	0	0	125	0	125	0	0	0	0	0	0	0	0	0	0	1675444	5.90E-05	0	0	30579	0	440529	9.41E-05	875969	1618688	4017737	2128826	641806	248042	999856	3564188	2884825	55436	1066151	103405	8329832	27398264	17664052	4216174	3752096	28759691	42011824	285233	9219424	12126853	0	119201326
subset:25770	Orchidinae	atcttaaaaaaaaaaatggaaaatgagaataaaaaga	0	0	0	0	0	0	0	0	0	0	0	0	0	0	0	0	0	0	128056	0	0	7.95E-05	0	0	0	0	0	0	0	0	0	0	0	0	0	0	0	0	0	0	0	0	0	0	0	0	0
subset:25781	Astragalus alpinus	atccttctttccgaaaacaaaaaaataaaagttcagaaagttaaaattaaaaaaaaaag	0	0	0	0	0	0	0	0	0	0	0	0	0	0	0	0	0	0	0	0	0	0	0	0	0	0	0	0	0	0	0	0	0	0	0	0	0	0	0	0	0	0	0	0	0	0	0
subset:25929	Valeriana 111	atccggtttttgttttccgaaaacaaacaaaggctaaaataaaaaaaag	0	0	0	0	0	0	0	0	0	0	0	0	0	0	0	1115301	265132	0	290931	0	131004	0	0	0	0	0	0	0	0	4.01E-05	2.03E-05	7.12E-05	0	0	125649	3.04E-05	0	6.89E-05	9.80E-06	0	0	0	0	0	1527195	0	963983
subset:25978	Pedicularis oederi 111	atcttcttttttttttcaaaacaagggttcagaaaacgaaaaaag	0	0	0	0	0	0	0	0	0	0	0	0	0	0	0	0	1.99E-05	0	0	21773	0	168691	0	0	0	0	0	0	0	0	0	0	0	0	0	0	0	0	0	0	0	0	0	0	0	0	0
subset:25981	Asterales 4	atcacgtttttcgaaaacaaacaaaggttcagaaagcgaaaataaaaaag	0	0	0	0	0	0	0	0	0	0	0	0	0	0	0	0	0	469337	0	0	0	0	0	0	0	0	0	0	0	0	0	0	0	0	0	0	0	0	0	0	0	0	0	0	0	0	0
subset:2609	Mesangiospermae	atcctgttttccgaaaacaaagaaaagttcataaagtgataataaaaaagg	0	0	0	0	0	0	0	0	0	0	0	125	0	0	0	0	0	683295	0	0	0	0	0	0	0	0	0	0	0	0	0	0	0	0	0	0	0	0	0	0	0	0	0	0	0	0	3.94E-05
subset:26303	Pulmonaria	atccggttttccgaaaacaaaagttgaaaaagaaaaaaggaaggag	0	0	0	0	0	0	0	0	0	0	0	0	0	0	0	365925	235752	0	567194	946662	606554	905797	612745	325797	640083	708977	279639	1562721	1041054	15528	5154546	819487	368302	740756	449587	1031428	110489	495238	3843	0	0	351022	130932	111172	0	0	4.97E-05
subset:26348	Poeae	atccgtgttttgagaaaacaaaggggttctcgaatcgaactataatacaaaggaaaag	0	0	0	0	0	0	0	0	0	0	0	0	0	0	0	3677163	1958332	592961	1084956	474853	2312821	0	2331147	4976337	1351386	2069519	902203	2480687	522587	566281	204223	474454	565426	1901726	3.63E-05	8.97E-05	513199	192101	166063	0	132415	65331	345642	0	1675546	0	3254439
subset:2644	Peucedanum austriacum	atcctattttccaaaaacaaacaaaggcccagaaggtaaaaaaag	0	0	0	0	0	0	0	0	0	0	0	0	0	0	0	0	0	0	0	0	0	0	0	0	0	0	0	0	0	0	0	0	0	0	0	5.26E-05	0	0	0	0	0	0	0	0	788949	0	0
subset:26452	Scabiosa 111	atccagttttccgaaaacaaacaagggttcagaaagctaaaaaaaaaag	0	0	0	0	0	0	0	0	0	0	0	0	0	0	0	555203	4043611	157747	403084	1297348	4340329	1405134	551221	40516	615746	156481	1650184	6734562	717103	3141284	1846891	80874	223059	160458	1327887	629536	376495	189463	0	0	209222	1062869	111797	186439	561198	0	625689
subset:26518	Veratrum album	atcttgattttgagaaatcaagggtttaggtttagtttctaaaatcaaactagaataaaaaaa	0	0	0	0	0	0	0	0	0	0	0	0	0	0	0	0	0	0	0	0	0	0	0	0	0	0	0	0	0	0	7.09E-05	0	0	102369	0	0	34054	8.32E-05	1.31E-05	1377756	0	0	1.75E-05	0	0	0	0
subset:26546	Carex 3	atcttctttttgagaaaaagaaataaaagaaatatataaaatatttcttatttcagataagaaataatattttttcttatcttatctaatattaaa	0	0	0	0	0	0	0	0	0	0	0	0	0	0	0	0	14849	0	0	9.92E-06	1.09E-05	0	0	0	0	183928	0	0	0	4.01E-05	0	0	0	0	0	0	0	0	0	0	0	0	0	0	0	0	0
subset:2671	Chamaenerion angustifolium	atcctattttacgaaaaccaacaccggggggttagaaagcgataaaaaaaaaag	0	0	0	0	0	0	0	0	0	0	0	0	0	0	0	0	0	0	0	0	0	0	0	0	0	5.66E-05	7.36E-06	0	5.70E-05	0	142494	205265	1.39E-05	0	196853	293553	4343641	745741	841956	0	0	0	0	4.09E-05	0	0	0
subset:26753	Doronicum 111	atcacgttttccgaaaacaaacaaaggttcagaaagcgaaaaaaaag	0	0	0	0	0	0	0	0	0	0	0	0	0	0	0	0	2.19E-05	0	0	321325	0	0	0	0	0	2.64E-05	0	0	0	0	1.62E-05	6.33E-05	0	4.13E-05	0	0	0	131477	0	0	0	0	147005	0	0	0	8.93E-05
subset:26767	Equisetum 1	attcgatttag	0	0	0	0	0	0	0	0	0	0	0	0	0	0	0	0	0	0	0	0	0	0	0	0	0	0	0	0	0	0	0	0	0	0	0	0	0	0	0	0	0	0	0	0	0	0	0
subset:26778	Geum 111	atcccgttttatgaaaagaaacaagggtttcagaacgcgagaataaataaag	0	0	0	0	0	0	0	0	0	0	0	0	0	0	0	1925468	520697	1098494	5107582	2243324	582979	5153492	1932418	1935995	540267	3809539	213826	56526	20808	4681374	25124866	1291258	6277065	7766221	9921405	13978563	7465542	600468	4490267	0	577803	887097	1726799	84863	5504529	0	6815653
subset:26955	Epipactis	atctttgttttgagaaaaaaaaatggaaaatgagaataaaaagg	0	0	0	0	0	0	0	0	0	0	0	0	0	0	0	0	0	0	0	0	0	0	0	0	0	0	0	0	0	0	0	0	0	0	0	0	0	0	0	0	0	0	0	0	0	0	0
subset:2696	Nannochloropsis gaditana	ctcataaaaatg	0	0	0	0	0	0	0	0	0	0	0	0	0	0	0	0	0	0	765029	12987	7.37E-05	0	0	134747	1662544	8.29E-05	166585	8.48E-05	5564582	364256	2272028	6797476	3102515	22617941	4246067	12661008	2283822	188324	0	0	0	0	0	0	5664639	0	1403032
subset:27071	Brachytheciaceae	atattatttcgtttgaaaatga	0	0	0	0	0	0	0	0	0	0	0	0	0	0	0	0	0	0	0	0	0	0	0	0	0	0	0	0	0	0	0	0	0	0	0	0	0	0	0	0	0	0	0	0	0	0	281876
subset:27155	Carex parviflora	atcttctttttgagaaaaaaaaatatataaaatatttcttatttcagataagaaataatattttttcttatctaatattaaa	0	0	0	0	0	0	0	0	0	0	0	0	0	0	0	0	0	0	0	0	0	0	0	0	0	0	0	0	0	0	0	0	0	0	0	0	0	0	0	0	0	0	0	0	0	0	0
subset:27156	Asteraceae 111	atcacgttttccgaaaacaagcaaaggttcagaaagcgaaaataaaaaag	0	0	0	0	0	0	0	0	0	0	0	0	0	0	0	21210587	32261361	8174923	5025029	9188533	20784635	15633681	4035122	2587785	706155	221034	1738957	4478556	1379752	11957558	919636	1173598	3810106	3106817	832963	1455448	2184717	417161	570495	1002004	317981	5490887	271163	144027	278024	0	2789368
subset:27179	Festuca quadriflora	atccgtgttttgagaaaactaggaggttctcgaactagaatacaaaggaaaag	0	0	0	0	0	0	0	0	0	0	0	0	0	0	0	451467	587064	469337	0	247253	270506	0	202076	840106	5.24E-05	116225	0	9.14E-05	188192	6.66E-05	0	0	6.70E-05	0	0	12448	0	0	0	0	101609	0	0	0	0	0	2.98E-05
subset:27343	Sicyos angulatus	atcctttttccgaaaacaaaaaaaag	0	0	0	0	0	0	0	0	0	0	0	0	0	0	0	0	0	0	0	0	0	0	0	0	0	0	0	0	0	0	0	0	0	0	0	0	0	0	0	0	0	0	0	0	0	0	0
subset:27443	Cystopteris	atcttgtattactcaaatgaatttcgggcgatgaggcaa	0	0	0	0	0	0	0	0	0	0	0	0	0	0	0	282167	0	165842	0	0	215305	0	0	220502	5.65E-05	7.52E-05	7.36E-06	491267	4.11E-05	4.01E-05	5.59E-05	0	5.11E-05	0	194612	0	0	0	0	0	0	0	136977	0	0	0	466924
subset:27453	Deschampsia cespitosa 111	atccatgttttgagaaaacaagggggttctcgaactagaatgcaaaggaaaag	0	0	0	0	0	0	0	0	0	0	0	0	0	0	0	1351004	832736	252143	695442	513863	200504	0	682993	134747	2220042	210422	1.96E-05	694181	627581	44425	1574221	1819835	250719	2122096	992272	1136298	3695497	402567	1348928	0	1010509	359023	1529698	205707	0	0	3199113
subset:27611	Saxifraga 8	atcctgttttaagaaagcaaaacacaagggttcagaaaaagaaaaaaaaaag	0	0	0	0	0	0	0	0	0	0	0	0	0	0	0	0	0	0	3.60E-05	0	0	0	0	5.22E-05	0	0	9.81E-06	0	0	0	0	0	0	0	1.61E-05	0	0	0	0	0	0	0	0	0	0	0	1.20E-05
subset:27659	Jurinea	atcacgttttctgaaaacaaacaaaggttcagaaagcgaaaatcaaaaag	0	0	0	0	0	0	0	0	0	0	0	0	0	0	0	0	0	0	0	0	135997	561385	0	0	0	0	0	0	0	0	0	0	0	0	0	0	0	0	0	0	0	0	4.28E-05	0	0	0	0
subset:27780	Cirsium arvense	atcacgttttccgaaaacaaaggttcagaaagcgaaaataaaaaag	0	0	0	0	0	0	0	0	0	0	0	0	0	0	0	1445156	630362	0	0	0	1622195	0	0	179662	0	0	0	0	0	0	114282	9.78E-05	166889	0	3.78E-05	3.47E-05	0	187806	47728	0	320807	206325	0	111209	0	0	0
subset:27838	Betula	atcctgttttccgaaaacaaataaaacaaatttaagggttcataaagtgagaataaaaaag	0	0	0	0	0	0	0	0	0	0	0	0	0	0	0	0	2.98E-05	0	0	0	0	0	936572	0	0	0	0	0	0	0	0	0	0	0	0	2.70E-05	0	107884	0	0	0	0	0	0	0	0	196963
subset:28030	Trifolium 1	atccttctttctgaaaacaaataaaagttcagaaagttaaaatcaaaaagg	0	0	0	0	0	0	0	0	0	0	0	0	0	0	0	867504	4265061	5825061	389725	3753895	4929479	588746	2251281	1051254	2381424	2210907	1524238	3392517	2708713	22549405	4134483	2663625	2309059	124846	397261	1196608	91804	696382	67683	0	376327	2320217	464469	144094	0	0	939381
subset:28141	Gemmabryum	atcttattgtctattaaaaataa	0	0	0	0	0	0	0	0	0	0	0	0	0	0	0	0	0	0	0	0	0	0	0	0	0	0	0	0	0	0	0	0	0	0	0	0	0	5.05E-05	0	0	0	0	0	0	0	0	0
subset:2834	Arabis 2	atcctggtttacgcgaacaaacctgagtttaaaaagcgagaaaagagg	0	0	0	0	0	0	0	0	0	0	0	0	0	0	0	0	0	0	0	0	0	0	0	0	0	2.38E-05	0	0	2.40E-05	0	2.84E-05	0	0	0	0	0	0	0	0	0	0	0	0	0	0	0	0
subset:28618	Parnassia palustris	atcctattttccaaaaacaaagaaaggttcagaaactaagaataaaactaaaacaaggg	0	0	0	0	0	0	0	0	0	0	0	0	0	0	0	611806	217211	630358	0	194854	4670194	816591	151883	9.69E-05	1667647	528176	178048	299303	104483	107043	1.23E-05	156956	101644	153259	2.61E-05	0	0	0	0	0	16079	0	12579	0	0	0	357686
subset:28674	PACMAD clade 111	atcccttttttgaaaaaacaagtggttctcaaactagaacccaaaggaaaag	0	0	0	0	0	0	0	0	0	0	0	0	0	0	0	0	0	0	0	0	0	0	0	0	0	0	0	0	0	0	0	0	0	0	0	0	0	0	0	0	0	326655	0	0	0	0	0
subset:28687	Vicia	atccttaagttaaaatcaaaaaag	0	0	0	0	0	0	0	0	0	0	0	0	0	0	0	0	0	0	0	0	0	0	0	0	0	0	0	0	6.85E-05	0	0	0	1.80E-05	0	0	0	0	0	0	0	0	0	0	0	0	0	0
subset:28809	Urtica dioica	atctggtgttataaaaacaagcgataaaaaaaag	0	0	0	0	0	0	0	0	0	0	0	0	0	0	0	442116	764094	0	0	475143	5.32E-05	0	1510014	833006	883919	118947	100919	104558	9.35E-05	267609	3602573	1928961	386192	821284	1535928	399499	741434	1009	13272	4377432	0	0	0	148399	0	0	0
subset:28844	Thalictrum	atcctggtttcagaaaacaaaaaaggggttcagaaagcaagaatacaaaaagaaaag	0	0	0	0	0	0	0	0	0	0	0	0	0	0	0	0	0	0	0	0	0	0	0	0	0	0	0	0	0	0	3.40E-05	0	8.12E-05	0	1.01E-05	0	108448	219028	3.92E-05	0	268197	413485	0	3.31E-05	0	0	656501
subset:28849	Globularia nudicaulis	atcctgttttctcagaacaaagattcagaaagcgaaaaagg	0	0	0	0	0	0	0	0	0	0	0	0	0	0	0	3288867	115047	3434816	1449806	305309	229574	1824018	194932	464678	366674	492588	17423	1591206	2261118	926108	631007	1680419	385719	260033	488547	101227	228655	49336	152674	0	342177	544425	141004	145254	2427805	0	3.00E-05
subset:28882	Juglans regia	atcctgttttctaaaaacaaataagggttcataaagcgagaatcaaaaag	0	0	0	0	0	0	0	0	0	0	0	0	0	0	0	0	0	0	0	1630435	0	0	0	0	0	0	0	0	6.86E-05	0	0	0	2.40E-05	0	0	0	0	0	0	0	0	0	0	0	0	0	0
subset:28968	Callitriche palustris	atcctgtcttttcaaaacaaaggttctaaaaacgaaattaagg	0	0	0	0	0	0	0	0	0	0	0	0	0	0	0	0	0	0	0	0	0	0	0	0	0	0	0	0	0	0	0	0	0	0	185333	0	319709	9.42E-05	0	0	0	0	0	0	0	0	0
subset:2897	Juniperus	atccgatttctagaaacaatagtttcctttccgagaacgg	0	0	0	0	0	0	0	0	0	0	0	0	0	0	0	0	0	0	0	0	0	0	0	0	0	0	0	0	0	0	2.03E-05	0	0	0	0	0	0	0	0	0	0	0	0	0	0	0	0
subset:29049	Luzula 3	atcttaatctggagaaaacttgtttctctataaaaactagaatcaaaaaggataaag	0	0	0	0	0	0	0	0	0	0	0	0	0	0	0	0	0	0	0	3.66E-05	0	0	0	0	0	1.59E-05	0	0	9.39E-05	116573	0	0	0	0	3.02E-05	0	0	0	0	0	0	0	0	0	0	0	0
subset:29057	Paederota	atcctgtcttctaaaaacaaaggttcagaaagtgaaaaaagg	0	0	0	0	0	0	0	0	0	0	0	0	0	0	0	0	0	0	0	0	8.59E-05	0	0	0	0	0	0	0	0	0	0	2.37E-05	0	0	0	0	0	0	0	0	0	0	0	0	0	0	0
subset:29091	Coleochaete scutata	atcattaaagttat	0	0	0	0	0	0	0	0	0	0	0	0	0	0	0	0	0	0	0	0	0	0	0	0	0	0	0	0	0	0	0	0	0	0	0	0	0	0	0	0	0	0	0	0	0	0	0
subset:2912	Anthyllis vulneraria	atcctgctttatgaaaacatgggaaagttcagttcagaaagcgacgagaaaaaag	0	0	0	0	0	0	0	0	0	0	0	0	0	0	0	1515423	2312376	1032784	3268794	257747	184136	1539115	148898	14806	281957	7.60E-05	456715	389458	8.32E-05	759858	500492	312347	139312	118483	393953	198303	0	223888	174363	0	283906	334831	0	0	0	0	0
subset:29130	Carex 2	atcttctttttgagaaaaagaaatataaaaaatatttcttatttcagataagaaataatattttttcttatctaatattaaa	0	0	0	0	0	0	0	0	0	0	0	0	0	0	0	408696	1631116	337357	116744	450507	145615	0	0	221631	9.02E-05	0	3.75E-05	188795	0	0	4.49E-05	0	9.02E-06	8.62E-05	0	2.39E-05	533662	294126	7.06E-05	760027	4.06E-05	1705874	0	6.95E-05	11314	0	4076488
subset:29132	Linaria	atcctgttttctcaaaacaaaggttcagaaagcaaaaaagg	0	0	0	0	0	0	0	0	0	0	0	0	0	0	0	0	145623	0	0	0	425701	944584	0	6.71E-05	0	283975	208082	152057	0	0	0	3.45E-05	0	0	5.98E-05	0	0	0	0	0	0	0	0	0	0	0	0
subset:29139	Arabis 3	atcctggtttacgcgaacaaaccagagtttagaaagcgagaaaagagg	0	0	0	0	0	0	0	0	0	0	0	0	0	0	0	0	0	0	0	0	0	0	0	0	0	7.38E-05	0	2.13E-05	0	0	118631	170999	4.51E-05	5.91E-05	7.27E-05	231597	0	0	0	0	0	0	0	0	0	0	0
subset:29181	Veronica serpyllifolia	atcctgtcttctaaaaacaaagatccagaaagtgaaaaagggg	0	0	0	0	0	0	0	0	0	0	0	0	0	0	0	1413596	3158472	4512462	4749689	939526	222393	864454	2422114	2980558	10509564	1656411	897738	2652223	13694953	4527086	1745701	4715969	3394547	2690949	5379715	550473	1148091	3503258	5599144	0	0	148617	5588414	199887	0	0	279556
subset:29387	Carduinae	atcacgttttccgaaaacaaaggttcagaaagcgaaaatcaaaaag	0	0	0	0	0	0	0	0	0	0	0	0	0	0	0	60938924	76318269	31627155	1655754	27910191	51355606	28967034	24894302	37144087	38700054	62623717	71551108	177558401	21339568	2455549	5297491	4375797	10102425	2728973	6839101	4555123	20467487	11662494	11436124	510714862	13452646	14025192	6790688	7369198	6462745	0	59014955
subset:29487	Funaria	atcttttatatttttaataa	0	0	0	0	0	0	0	0	0	0	0	0	0	0	0	0	0	0	0	0	0	0	0	0	0	0	0	0	0	0	0	0	0	0	0	0	0	0	0	0	0	0	0	0	0	0	0
subset:2958	Staurastrum punctulatum	atcctaaaacttttaagtttttag	0	0	0	0	0	0	0	0	0	0	0	0	0	0	0	0	0	0	0	0	0	0	0	0	0	0	0	0	0	0	0	0	0	0	0	0	0	0	0	0	0	0	0	0	0	0	0
subset:29592	Quercus 1	atcctattttacgaaaacaaataagggttcagaagaaagcaagaataaaaaaag	0	0	0	0	0	0	0	0	0	0	0	0	0	0	0	0	0	0	291917	0	103181	0	0	0	4.58E-05	0	0	0	0	0	2.45E-05	5.23E-05	1.80E-05	6.09E-05	165345	0	0	0	0	0	0	0	0	0	0	0	0
subset:29606	Leontodon autumnalis	atcacgttttccgaaaacacacaaaggttcagaaagcgaaaatcaaaaag	0	0	0	0	0	0	0	0	0	0	0	0	0	0	0	4336541	5887081	4864029	908781	3294792	6354967	1448143	5571906	2133598	540575	0	0	0	0	0	0	0	0	0	0	0	0	0	0	0	0	0	0	1.20E-05	0	0	0
subset:2963	Juniperus	ttccgatttctagagacaatagtttcctttccgagaacgg	0	0	0	0	0	0	0	0	0	0	0	0	0	0	0	0	0	0	0	0	0	0	0	0	0	0	0	0	0	0	0	0	0	0	0	0	0	0	4.07E-05	0	0	0	0	6.46E-05	0	0	0
subset:29925	Campanula	atccggttttctgccaataacaaaaggttcagaaagcgaaaatcaaaaag	0	0	0	0	0	0	0	0	0	0	0	0	0	0	0	0	4.32E-05	0	0	0	0	0	9.41E-05	0	0	0	0	0	0	0	2.16E-05	0	0	0	210157	4.18E-05	0	2.97E-05	0	0	0	0	0	0	0	0	0
subset:29943	Oxytropis	atcctgctttccgaaaacaaaaaaataaaagttcagaaagttaaaattaaacaaataaag	0	0	0	0	0	0	0	0	0	0	0	0	0	0	0	0	190981	0	0	0	0	0	0	0	0	0	0	0	0	0	0	0	0	0	0	0	0	0	0	0	0	0	0	0	0	0	0
subset:30108	Empetrum nigrum	atcctttatttggcaaacaaacaaagattccgaaagctaaaaaaag	0	0	0	0	0	0	0	0	0	0	0	0	0	0	0	0	0	0	0	524067	0	0	0	0	0	0	0	0	0	0	0	0	0	0	3.43E-05	0	0	0	0	0	0	0	0	0	0	0	0
subset:30116	Saxifraga 3	atcctgttttaagaaagcaaaacacaagggttcagaaaaagcgaataaaaaaaaggaaag	0	0	0	0	0	0	0	0	0	0	0	0	0	0	0	0	0	0	0	0	0	0	0	0	0	0	0	0	0	0	0	0	0	0	2.22E-05	0	0	0	0	0	0	0	0	0	0	0	154757
subset:30282	Alchemilla 2	atcccttatttatgaaaacaaaggtttcagaaagcgagaataaataagg	0	0	0	0	0	0	0	0	0	0	0	0	0	0	0	5404601	2492865	4906657	4490313	6828201	5329816	5877456	4485446	7527572	3024108	8365362	2452577	3299662	2509912	2985149	280442	1538021	2997131	1830298	3167499	341635	589753	564703	562474	0	0	0	7.04E-05	0	647389	0	3.28E-05
subset:30322	Bartramiaceae	atcttatttgatttaaaaataa	0	0	0	0	0	0	0	0	0	0	0	0	0	0	0	0	0	0	0	0	0	0	0	0	0	0	0	4.34E-05	0	0	0	0	0	0	0	0	0	0	0	0	0	0	0	0	0	0	0
subset:30456	Linaria/Hedera	atcctcttctcttttccaagaacaaacaggggttcagaaagcgaaaaagggg	0	0	132533273	0	0	0	0	0	0	0	0	0	0	0	0	0	2361	0	0	0	0	0	0	0	0	0	0	0	0	0	0	3.04E-05	0	0	0	0	0	0	0	0	0	0	0	0	0	0	0
subset:30468	Rhinanthus	atcctgttttcttaaaacaaagattcagaaaacgaaaaaaaaagg	0	0	0	0	0	0	0	0	0	0	0	0	0	0	0	0	0	40241	0	0	0	0	0	0	0	0	3.94E-05	0	0	0	405631	372628	115473	202942	512568	7.80E-05	6.78E-05	248866	309421	0	466264	351022	0	9.56E-06	1806681	0	532163
subset:30472	Gymnocarpium dryopteris	atcttgtattactcaaatgaatttcgggcaatgaggcaa	0	0	0	0	0	0	0	0	0	0	0	0	0	0	0	0	0	0	0	0	0	0	0	0	0	1.19E-05	0	0	0	0	0	0	3.61E-05	0	0	0	0	0	0	0	0	0	0	0	0	0	0
subset:30514	Helianthemum 2	atcctgttttacgagcagttcaaaaagcaataaaaaatag	0	0	0	0	0	0	0	0	0	0	0	0	0	0	0	120016	58442	3090363	111371	4609825	2191495	146295	2800097	3117619	1248672	495536	558031	364825	1543549	6.69E-05	121353	0	147384	4.79E-05	171593	6.65E-05	0	2.38E-05	6.35E-05	0	0	634105	0	0	0	0	0
subset:30532	Cerinthe minor	atccggttttccgaaaacaaacaaaagttgaaaaagaaaaaag	0	0	0	0	0	0	0	0	0	0	0	0	0	0	0	0	0	0	0	0	0	0	0	0	0	0	7.50E-05	1.96E-05	1.71E-05	260485	2347155	344417	104996	0	267651	197281	713525	547184	1858876	0	1201701	705982	4.59E-05	141873	956797	0	0
subset:30564	Persea	atcctgttttcagaaaacaagggttcagaaagcgagaaccaaaaaaaggatag	0	0	0	0	0	0	0	125	48203285	125	125	0	0	0	0	0	0	0	0	0	0	0	0	0	0	0	0	0	0	0	0	0	0	0	0	0	0	0	0	0	0	0	0	0	0	0	0
subset:30679	Alchemilla 111	atcccgttttatgaaaacaaaggtttcagaaagcgagaataaataagg	0	0	0	0	0	0	0	0	0	0	0	0	0	0	0	65351323	24083752	154377202	61239817	19198512	6129292	21138675	345027441	22342406	41254459	34881249	5344972	2216622	2655088	17552183	22780785	17392615	20574538	85798	11885531	4337186	3879479	3353442	3826997	0	116977	151302	1163491	1025887	4221377	0	7054719
subset:30690	Boraginaceae	atccggttttccgaaaacaaaagttgaaaaagaaaaaag	0	0	0	0	0	0	0	0	0	0	0	0	0	0	0	0	0	0	0	0	0	0	0	0	0	0	0	0	0	0	1.22E-05	0	0	0	0	0	0	0	2.94E-05	0	0	0	0	0	0	0	0
subset:30777	Achillea	atcacgttttccgaaaacaaacaaaggttaagaaagcgaaaagaaaaaaaa	0	0	0	0	0	0	0	0	0	0	0	0	0	0	0	260822	0	0	0	329802	0	0	1302553	561766	906899	2313976	3227124	219967	4.16E-05	0	0	0	0	0	549787	0	0	4.44E-05	0	0	0	0	0	0	0	0	0
subset:30857	Oreopteris limbosperma	atcttgtattactcaaatgaatttcgggcgaggaagcga	0	0	0	0	0	0	0	0	0	0	0	0	0	0	0	0	0	988052	2231831	0	0	0	0	0	7.06E-05	3.96E-05	0	1.06E-05	0	0	0	0	0	0	0	0	0	0	0	0	0	0	0	0	0	0	0
subset:30874	Asteraceae 8	atcacgttttccgaaaacaaacaaaagttcagaaagcgaaaatcaaaaag	0	0	0	0	0	0	0	0	0	0	0	0	0	0	0	0	0	0	0	0	0	0	0	0	0	0	0	0	0	0	0	0	0	0	0	0	0	0	0	0	0	0	0	0	0	0	0
subset:30877	Aveninae	atccgtgttttgagaaaaccaggaggttctcgaactagaatacaaaggaaaag	0	0	0	0	0	0	0	0	0	0	0	0	0	0	0	0	0	0	0	0	4.76E-05	0	253139	0	4.58E-05	0	0	0	0	0	6.80E-05	0	0	0	0	416626	0	0	3.59E-05	0	0	0	8.04E-05	0	0	0	1081217
subset:30954	Ophioglossum vulgatum	atcttgttcttaggatga	0	0	0	0	0	0	0	0	0	0	0	0	0	0	0	0	0	0	0	0	0	0	0	0	0	0	0	0	0	0	410564	0	0	0	0	0	0	0	0	0	0	0	0	0	0	0	0
subset:31002	Silene vulgaris	ctccttttttcaaaagcaaaaaagtattaagaaagcaagaaaaaaag	0	0	0	0	0	0	0	0	0	0	0	0	0	0	0	0	0	0	0	0	0	0	0	0	0	7.31E-05	7.36E-06	2.83E-05	0	0	6.92E-05	0	1.20E-05	0	0	101427	254002	155152	2.61E-05	0	0	1375729	139766	9.56E-06	975197	0	202776
subset:31004	Asteraceae 3	atcacgttttccgaaaacaaacaaaggttcagaaagcgaaaatcaaaaaa	0	0	0	0	0	0	0	0	0	0	0	0	0	0	0	0	0	0	0	0	0	0	0	0	0	0	0	0	0	0	0	0	0	0	0	0	0	0	0	6.13E-05	0	0	0	0	0	0	0
subset:31061	Helictochloa versicolor 111	atccgtgttttgagaaaacaagaaggttcttgaactagaatacaaaggaaaag	0	0	0	0	0	0	0	0	0	0	0	0	0	0	0	0	0	0	0	0	0	0	0	0	0	0	0	1.42E-05	0	0	3.40E-05	0	3.01E-05	0	7.85E-05	1.87E-05	0	6.42E-05	5.54E-05	0	0	0	0	0	0	0	0
subset:31149	Acer 1	atcctgttttacgagaataaaacaaagcaaacaagggttcagaaagcgagaaaagg	0	0	0	0	0	0	0	0	0	0	0	0	0	0	0	256148	431939	0	273554	0	119055	439605	243665	134747	0	422272	0	0	1.71E-05	8.33E-05	523854	290455	117414	0	70102	365379	393637	534624	277792	4793076	598135	1162123	4.28E-05	5.81E-05	2736953	0	4.97E-05
subset:31336	Rumex 111	ctcctcctttccaaaaggaagaataaaaaag	0	0	0	0	0	0	0	0	0	0	0	0	0	0	0	2538956	726337	10731086	455231	4682937	1298773	2322604	1138211	1697433	1224626	1467858	948475	1158073	14273636	7363418	18322963	40215938	13704536	20667977	22231392	27377119	71350743	52988849	90588863	20616279	47306584	62266206	289636192	3159159	53581498	25568942	4022431
subset:31412	Sambucus	atcctgttttccgaaaacaaacaaaggttcagaaagcgaaaataaaaaag	0	0	0	0	0	0	0	0	0	0	0	0	0	0	0	0	0	0	0	0	0	0	0	0	0	0	0	0	0	0	3.54E-05	0	0	0	0	0	0	8.32E-05	1.63E-05	0	111526	271065	0	8.57E-05	135085	0	1.20E-05
subset:31417	Microchloropsis	ctcataaaagtg	0	0	0	0	0	0	0	0	0	0	0	0	0	0	0	0	0	0	0	0	0	0	0	0	0	0	0	0	0	0	0	0	0	0	0	0	0	0	0	0	0	0	0	0	0	0	0
subset:31486	Solanoideae	atcctgttttctgaaaacaaacaaaggttcagaaaaaaag	0	0	0	0	0	0	0	0	0	0	0	0	0	0	123741405	0	0	0	0	9.74E-05	0	0	0	0	0	0	0	0	0	0	0	0	0	0	0	0	0	0	0	0	0	0	0	0	0	0	0
subset:31564	Avenella flexuosa	atccatgttttgagaaaacaagggggttctcgaactagaatacaacggaaaag	0	0	0	0	0	0	0	0	0	0	0	0	0	0	0	0	0	0	0	0	0	0	0	0	0	0	0	0	0	0	0	0	9.74E-05	0	0	1.87E-05	0	0	0	0	0	0	0	0	0	0	0
subset:31581	Hippocrepis comosa	atcctgctttacgaaaacaaggtaaaattgtgttcattcagaaagcgagaaaaaagg	0	0	0	0	0	0	0	0	0	0	0	0	0	0	0	0	50135	0	367618	0	372605	0	0	441101	27849	713561	404635	574731	0	190021	6.69E-05	193899	4.43E-05	172348	0	9.55E-05	0	111961	8.14E-05	0	9.80E-05	1044564	0	0	0	0	104498
subset:31697	Apioideae	atcctttttttccaaaaacaaacaaaggcccagaaggtgaaaaaag	0	0	0	0	0	0	0	0	0	0	0	0	0	0	0	0	0	0	0	0	0	0	0	0	0	0	0	0	0	0	0	0	0	0	0	0	0	0	0	0	3.39E-05	0	0	0	0	0	0
subset:31919	Asteroideae111	atcacgttttccgaaaacaaacaaaggttcagaaagcgaaaagaaaaaaaa	0	0	0	0	0	0	0	0	0	0	0	0	0	0	0	44687039	72850646	41139022	9527792	22707009	70185821	42865428	28038329	23267892	10449939	13364334	9175129	18798845	4594882	40529047	9192715	4114377	19654999	24581353	6043296	6792133	4266513	2456547	2910428	2623321	10743774	23711631	2631004	1411963	10962128	0	5348606
subset:31960	Rhinanthus alectorolophus	atcctgttttcttaaaacaaagattcagaaaacgaaaaaaaagg	0	0	0	0	0	0	0	0	0	0	0	0	0	0	0	0	0	0	0	0	0	0	0	0	0	1.37E-05	0	0	0	0	304212	0	0	4.43E-05	8.04E-05	1.87E-05	0	6.89E-05	0	0	0	721238	2.57E-05	0	35534	0	7.68E-05
subset:31998	Hieraciinae 111	atcacgttttccgaaaacaaaaaaggttcagaaagcgaaaatcaaaaag	0	0	0	0	0	0	0	0	0	0	0	0	0	0	0	987793	286947	1124859	0	48486	0	0	762659	278578	6223969	4944916	1050716	1066493	1227092	330372	3.25E-05	3.45E-05	85886	0	0	0	9.49E-05	0	0	0	0	0	209649	1.67E-05	0	0	0
subset:32056	Asterales 3	atcacgttttccgaaaataaacaaaggttcagaaagcgaaaataaaaaag	0	0	0	0	0	0	0	0	0	0	0	0	0	0	0	0	0	0	0	0	0	0	0	0	0	0	0	0	0	0	0	0	0	0	0	0	0	0	0	0	0	443787	0	0	0	0	0
subset:32068	Arabis 1	atcctggtttacgcgaacaaacctgcgtttaaaaagcgagaaaagagg	0	0	0	0	0	0	0	0	0	0	0	0	0	0	0	0	0	0	0	0	0	0	0	0	0	0	0	1.06E-05	0	0	0	0	0	0	0	0	0	3.85E-05	0	0	0	292466	0	0	0	0	443176
subset:32192	Rumex scutatus	ctcctcctttccaaaaggaagaataaaatag	0	0	0	0	0	0	0	0	0	0	0	0	0	0	0	0	0	0	0	0	0	0	0	0	0	0	0	0	0	0	0	0	0	0	0	0	0	0	0	0	0	0	0	0	0	0	0
subset:32280	Juniperus	atccgatttctagagacaatagtttcctttccgagaacgg	0	0	0	0	0	0	0	0	0	0	0	0	0	0	0	0	186036	376915	679902	345507	671705	2161134	617771	31859	116411	111077	8.96E-05	49188	107226	939778	2486871	2140524	967638	454893	7579402	1337235	13786	2082863	2385418	6926057	11547543	6618926	3138476	1862474	4491172	0	7774862
subset:32298	Veronica subgen. Veronica 111	atcctgtcttctaaaaacaaaggttcagaaagtgaaaaaaaaagg	0	0	0	0	0	0	0	0	0	0	0	0	0	0	0	1052658	766889	4283119	6432072	7076496	2071508	1923392	2755793	5775524	1118905	7151846	3716295	8743809	39306238	3032086	1155356	2288231	5288398	2674195	7428838	2864752	456942	136321	42436	0	0	175511	168546	6.08E-05	0	0	1654524
subset:32404	Saxifraga cotyledon	atcctgttttaagaaagcaaaacacaagggttcagaaaaagtaaaaaaaaaaaag	0	0	0	0	0	0	0	0	0	0	0	0	0	0	0	0	0	0	0	0	0	0	0	0	0	1.59E-05	0	0	0	0	0	0	0	0	0	0	0	0	0	0	0	0	0	0	0	0	2.98E-05
subset:32476	Asplenium viride	atccagcattacttgaataaattacaatgagtttaaagcgatgagacgg	0	0	0	0	0	0	0	0	0	0	0	0	0	0	0	0	0	540096	0	0	102559	0	0	5.96E-05	0	1.10E-05	0	0	0	0	0	0	4.31E-05	0	0	3.11E-05	0	1.78E-05	0	0	0	0	68066	0	0	0	198182
subset:3248	Scandicinae 1	atcctattttttccaaaaacaaacaaaggcccagaaggtgaaaaaag	0	0	0	0	0	0	0	0	0	0	0	0	0	0	0	0	0	0	0	0	0	0	0	0	7.24E-05	0	0	0	0	4.01E-05	0	2.07E-05	0	0	262116	124259	470331	631103	2850659	417519	5537313	49719	7.39E-05	345222	135227	0	793263
subset:3291	Vaccinium myrtillus 111	atcctttttttttttggcaaacaaataaagattccgaaagaaaaagg	0	0	0	0	0	0	0	0	0	0	0	0	0	0	0	1059596	10842	1470481	454405	599233	23989	641461	157893	57746	195436	233945	194931	499987	962597	896329	10073826	11032693	1999298	3048788	5268002	3355485	5211778	2972759	4310769	0	7.45E-05	615485	170757	267933	2629897	0	103181
subset:3455	Trollius europaeus	atcctgttttcagaaaacaaaaagggttcagaaagcaagaatcaaaaag	0	0	0	0	0	0	0	0	0	0	0	0	0	0	0	0	0	0	0	0	0	0	0	0	0	8.23E-06	7.57E-06	1.42E-05	0	6.66E-05	198103	160107	106924	8.69E-05	431658	1268282	1054742	948347	705613	0	258733	538535	676897	9.82E-05	0	0	6136303
subset:3456	Cerastium 1	ctccttaattgtctcctaaaaaaaacggattcaaaaagaaagaataaaaaag	0	0	0	0	0	0	0	0	0	0	0	0	0	0	0	0	0	0	0	0	0	0	0	0	0	2.77E-05	0	1.06E-05	148787	0	2.84E-05	0	0	0	0	0	0	0	0	0	0	0	0	0	0	0	0
subset:3504	Pedicularis foliosa	atcttctttttttttcaaaacaaaggtttagaaaacgaaaaaaaag	0	0	0	0	0	0	0	0	0	0	0	0	0	0	0	0	0	0	0	0	0	0	0	0	0	0	0	0	0	106755	519032	506216	7.59E-05	164083	307309	1749014	423895	2029794	6091508	1503006	7863384	7313747	166264	882179	177306	0	49306517
subset:3524	Comarum palustre	atcccgttttatgaaaacaaacaagggtttcagaaagcgagaataaataagg	0	0	0	0	0	0	0	0	0	0	0	0	0	0	0	0	0	552259	0	0	0	0	0	0	0	2.47E-05	0	0	0	0	0	2.07E-05	1.39E-05	0	0	0	0	0	4.07E-05	0	0	0	0	0	0	0	1.50E-05
subset:3525	Geranium sylvaticum 111	atccttttttacgaaaataaagagggtctcagaaagcgagaatagaaaaaaaaag	0	0	0	0	0	0	0	0	0	0	0	0	0	0	0	9.15E-05	135744	744619	211995	419147	337827	1836401	363605	1552486	660145	1621279	108901	378307	333158	3631003	31143758	21492363	714621	451372	2340241	18674848	65240623	40412213	52548049	3251343	716893	783032	6107338	1819172	2980771	0	6345634
subset:3585	Asteraceae 17	atcacgttttccgaaaataaacaaaggttcagaaagcgaaaatcaaaaag	0	0	0	0	0	0	0	0	0	0	0	0	0	0	0	0	0	0	0	0	0	0	0	0	0	0	0	0	0	0	0	0	0	0	0	0	0	0	0	0	0	0	0	0	0	0	0
subset:3659	Potentilla 3	atcccgttttatgaaaacaaacaagggtttcataaagcgagaataaataaag	0	0	0	0	0	0	0	0	0	0	0	0	0	0	0	1907602	497115	3355713	325992	361759	1081357	1770576	2690418	4425117	981859	5688035	772907	14088	4300108	1146432	4212196	2857271	3103441	2288564	378049	945204	100852	1366834	1520038	0	0	0	646308	4.54E-05	0	0	173302
subset:3875	Ulmus	atcctgttttatgaaaataagggttcataaagcgataataaaaaag	0	0	0	0	0	0	0	0	0	0	0	0	0	0	0	0	0	0	0	0	0	0	0	0	0	0	0	0	0	0	0	0	0	0	0	0	0	0	0	0	0	0	0	0	0	0	0
subset:388	Pedicularis 2	atcttctttttttttcaaaacaaaggtttagaaaacgaaaaaaag	0	0	0	0	0	0	0	0	0	0	0	0	0	0	0	0	0	0	0	0	0	0	0	0	0	0	0	0	0	0	0	0	0	0	0	1.87E-05	191424	4.35E-05	0	0	199917	0	0	0	2.72E-05	0	899301
subset:3992	asterids	atcctgttttccgaaaacaaacaaaggttcagaaagcgaaaatcaaaaag	0	0	0	0	0	0	0	0	0	0	0	0	0	0	0	0	0	0	0	0	0	0	0	0	0	0	0	0	0	0	0	0	0	0	0	0	0	0	9.80E-06	0	0	0	0	0	0	0	0
subset:4022	Saxifraga 111	atcctgttttaagaaagcaaaacacaagggttcagaaaaagcgaataaaaaaaaaaag	0	0	0	0	0	0	0	0	0	0	0	0	0	0	0	2569631	13197135	5230148	24154	5757274	15013779	12221097	4503309	4594261	3445516	6353132	6492994	3941619	103742	5661645	2683752	23089	947381	4551143	1865217	374762	5.42E-05	244496	123865	2038642	1760422	3322506	108834	13472	2909118	0	527417
subset:4084	Penium margaritaceum	atcctttgagttgaaatgctaaag	0	0	0	0	0	0	0	0	0	0	0	0	0	0	0	0	0	0	0	0	0	0	0	0	0	0	0	0	0	0	0	0	0	0	0	0	0	0	0	0	0	0	0	0	0	0	0
subset:4121	Poa	atccgtgttttgagaaaacaaaggggttctcgaactagaatacaaaggaaaag	0	0	0	0	0	0	0	0	0	0	0	0	0	0	0	186607	211911	863116	1622839	253431	1224767	0	947001	14806	81263	4379	3.96E-05	250718	316325	9.01E-05	223645	138557	196771	752483	109059	0	508417	8.70E-05	7.39E-05	0	0	0	0	0	0	0	948561
subset:4206	Androsace	atcctctttttagaaaacaaaaatgaaaggaaaataaaaagggg	0	0	0	0	0	0	0	0	0	0	0	0	0	0	0	0	0	0	0	0	0	0	0	0	0	0	0	0	0	0	0	0	0	0	7.71E-05	0	0	0	0	0	0	0	0	0	0	0	0
subset:4261	Veronica subgen. Veronica 2	atcctgtcttctaaaaacaaaggttcagaaagtgaaaaaaagg	0	0	0	0	0	0	0	0	0	0	0	0	0	0	0	42281	1686498	397839	3676765	4512082	9581576	4321896	3095537	4854623	5269639	4664075	2801823	9327963	4875613	737097	13329	718529	1221884	3997997	1059215	144396	0	0	9.50E-05	0	1598264	0	0	0	0	0	0
subset:4284	Rhododendron	atccttttttcgcaaacaaacaaagattccgaaagctaaaaaaaag	0	0	0	0	0	0	0	0	0	0	0	0	0	0	0	413223	129739	0	595886	5.58E-05	237445	0	0	286041	182461	0	1.23E-05	0	8.66E-05	0	24258	520422	0	476259	2528552	2731293	437473	208018	26137	2930634	240562	1616761	385393	4.26E-05	125675	0	1580236
subset:4528	Mentheae	atcctgttttctcaaaacaaag	0	0	0	0	0	0	0	0	0	0	0	0	0	0	0	62550606	1731325	109213092	51625774	138686161	275215136	101987971	221889849	310966674	252406771	491184125	740623543	32572078	142096579	21209904	50331478	40988141	108474564	50685417	25927711	7671975	1343567	16915	2232453	0	9085637	5793529	3091655	4730227	1504805	0	672493
subset:4573	Hieraciinae 2	atcacgttttccgaaaacaaaaaaggttcagaaagcgaaaataaaaaag	0	0	0	0	0	0	0	0	0	0	0	0	0	0	0	365925	0	0	18359	0	0	0	342153	143021	744101	548826	914693	203026	0	0	0	0	0	0	0	0	0	0	0	0	0	0	0	0	0	0	0
subset:4646	Saussurea	atcacgttttccgaaaacaaacaaaggttcagaaagcgaaaatccaaaag	0	0	0	0	0	0	0	0	0	0	0	0	0	0	0	0	0	0	0	0	0	0	0	0	0	0	0	0	0	0	0	51077	0	0	0	0	0	0	0	0	0	0	0	0	0	0	0
subset:4664	Quercus 2	atcctattttacgaaaacaaataagggttcagaagaaagcgagaataaaaaaag	0	0	0	0	0	0	0	0	0	0	0	0	0	0	0	0	0	0	2.33E-05	0	0	0	0	0	0	0	0	0	0	0	3.40E-05	0	0	0	0	0	0	5.93E-05	0	0	0	0	0	0	0	0	0
subset:4676	Pteridium aquilinum	atcttgtattacccgaatgaatttcggtcgatggaacga	0	0	0	0	0	0	0	0	0	0	0	0	0	0	0	0	0	0	0	0	9353858	27533	0	0	208797	0	0	0	7.44E-05	107043	0	4.97E-05	210026	0	0	184943	0	0	0	0	0	0	0	199627	0	0	199452
subset:4750	Dactylorhiza incarnata	atcttaaaaaaaaaatggaaaatgagaataaaaaga	0	0	0	0	0	0	0	0	0	0	0	0	0	0	0	0	0	0	5.82E-05	0	0	1.99E-05	0	0	0	0	0	0	0	0	0	0	0	0	0	0	0	0	0	0	0	0	0	0	0	0	0
subset:4775	Luzula sylvatica	atcttaatctggagaaaacttgtttctctataaaaactaaagtcaaaaaggataaag	0	0	0	0	0	0	0	0	0	0	0	0	0	0	0	164666	0	0	0	0	0	0	0	451357	0	0	0	0	0	120424	157258	9.42E-05	9.15E-05	0	7.13E-05	0	4.07E-05	5.53E-05	0	0	0	0	4.28E-05	4.55E-05	0	0	284327
subset:4801	Chaerophyllum aureum	atcctttttttccaaaaacaaaaaaggccccagaaggtgaaaaag	0	0	0	0	0	0	0	0	0	0	0	0	0	0	0	0	0	0	0	175439	0	0	0	0	0	1.59E-05	0	2.13E-05	0	0	8.67E-05	3.04E-05	7.39E-05	0	153401	0	0	166245	314957	0	3157893	432339	158368	102999	2840619	0	0
subset:4914	Ranunculus 4	atcctgctttcagaaaaaaaaaggggagttcagaaagcaaaaatagg	0	0	0	0	0	0	0	0	0	0	0	0	0	0	0	17719	649644	2914834	2734207	450278	305795	0	0	0	0	0	0	5.81E-05	0	0	4.46E-05	0	7.03E-05	8.68E-05	285849	1.87E-05	3872441	1852765	6109792	5760532	1082033	1020407	9270728	512837	3001056	0	2441406
subset:4999	Vaccinium vitis-idaea	atccttttttttttggcaaacaaataaagattccgaaagaaaaaaaaagg	0	0	0	0	0	0	0	0	0	0	0	0	0	0	0	0	142525	0	147697	2.75E-05	0	445898	4.25E-05	147929	3.93E-05	163563	1.47E-05	2.83E-05	119817	0	1.22E-05	290159	6.95E-05	148793	120714	0	0	1.97E-05	0	0	0	53612	0	0	0	0	5.45E-05
subset:5172	Veronica cymbalaria	atcctgtcttctaaaaacaaaggttcagaaagtgaaaaaggg	0	0	0	0	0	0	0	0	0	0	0	0	0	0	0	0	0	0	0	0	0	0	0	0	0	0	0	0	4.51E-05	0	0	0	0	0	0	0	0	0	0	0	0	0	0	0	0	0	0
subset:5173	Fraxinus excelsior	atcctgttttcccaaaacaaaggttcagaaagaaaaaag	0	0	0	0	0	0	0	0	0	0	0	0	0	0	0	0	0	0	0	0	0	0	0	0	0	0	0	0	0	0	3.40E-05	0	0	0	0	0	0	186456	0	0	142423	0	0	0	0	0	0
subset:52	Nardus stricta	atccgtgttttgagaaaacaagtggttctcgaactagaatccaaaggaaaag	0	0	0	0	0	0	0	0	0	0	0	0	0	0	0	0	239281	0	1162561	0	0	0	0	0	138958	7.00E-05	0	500748	5.14E-05	0	0	0	0	143623	7.86E-05	0	0	0	0	0	0	0	0	0	0	0	0
subset:5373	Athamanta cretensis 111	atcctatttttttttccaaaaacaaacaaaggcccagaaggtgaaaaaag	0	0	0	0	0	0	0	0	0	0	0	0	0	0	0	0	779883	0	0	0	0	0	0	0	0	0	0	13303	217293	403531	6.85E-05	0	2.70E-05	312631	0	0	0	0	0	0	4.06E-05	0	0	0	0	0	0
subset:5403	Ranunculus 3	atcctgctttcagaaaacaaaaagagggttcagaaagcaaagg	0	0	0	0	0	0	0	0	0	0	0	0	0	0	0	52904152	28131115	30239858	16411942	28905175	6588159	16009739	2683119	21810011	55101003	26023412	15341707	29890928	45138927	31040135	13057692	13554743	22553259	15368107	7052911	6513192	1408864	7882332	1774635	6700902	4622821	7614267	20162072	3762499	3805081	60824829	49205951
subset:5683	Sibbaldia procumbens	atcccgttttatgaaaacaaacaaaggtttcagaaagcgagaaaaaataagg	0	0	0	0	0	0	0	0	0	0	0	0	0	0	0	0	0	0	0	0	0	660793	0	517664	252895	503755	3.71E-05	3.54E-05	8.81E-05	0	0	1.52E-05	3.05E-05	0	0	0	0	0	0	0	0	0	0	0	0	0	0
subset:579	Asteraceae 7	atcacgttttccgaaaacaaacaacggttcagaaagcgaaaatcaaaaag	0	0	0	0	0	0	0	0	0	0	0	0	0	0	0	0	0	0	0	1126663	0	0	0	0	0	0	0	0	0	0	0	0	0	0	0	0	0	0	0	0	0	0	0	0	0	0	0
subset:5919	Nannochloropsis	ctcatgaaaatg	0	0	0	0	0	0	0	0	0	0	0	0	0	0	0	0	0	0	0	0	0	8.45E-05	0	0	0	0	0	0	0	0	5.00E-05	0	1.39E-05	762763	5.05E-05	0	0	4.16E-05	0	316762	5.32E-05	1.82E-05	7.21E-05	11467	295606	15918961	1.20E-05
subset:6012	Asteraceae 12	atcacgttttccgaaaacaagcaaagattcagaaagcgaaaataaaaaag	0	0	0	0	0	0	0	0	0	0	0	0	0	0	0	0	0	0	0	0	0	0	0	0	0	0	0	0	0	5.00E-05	0	0	0	0	0	0	0	0	0	0	0	0	0	0	0	0	0
subset:6026	Silene acaulis	ctccttttattttcctttttttcaaaagcaaagatgaagaaagcaagaaaaaaagg	0	0	0	0	0	0	0	0	0	0	0	0	0	0	0	0	0	0	0	7.97E-05	3.71E-05	0	0	0	0	2.64E-05	0	0	0	0	0	0	0	0	0	0	0	0	0	0	0	0	0	0	0	0	0
subset:6153	Delphinium elatum	atcctgtttttagaaaacaaatgaaaataaaataaagggttcagagaaagcaagaataaaag	0	0	0	0	0	0	0	0	0	0	0	0	0	0	0	0	0	0	0	0	0	0	0	0	0	0	0	0	0	0	0	0	0	0	0	0	0	0	0	0	0	0	0	0	0	0	0
subset:6265	Astrantia	atcctgttttccaaaaacaaacaaaggttcagaaggtgaaaaaag	0	0	0	0	0	0	0	0	0	0	0	0	0	0	0	0	0	0	0	0	0	0	0	0	8.47E-05	5.81E-05	11604	4.22E-05	0	120424	8.74E-05	455617	3.05E-05	0	0	101437	0	706186	336023	0	1074231	799977	0	135635	2186912	0	6.43E-05
subset:6460	Veronica subgen. Beccabunga	atcctgtcttctaaaaacaaagattcagaaagttaaaaaaaggg	0	0	0	0	0	0	0	0	0	0	0	0	0	0	0	128074	174314	3115148	3684157	4581458	1054204	253036	631717	1941808	1549613	566307	1132501	1523992	33428735	9066238	6134916	24968823	5674248	4276207	16095337	554659	7498108	2804261	1500207	0	4.73E-05	3475132	2414577	2761388	0	0	71721
subset:6664	Boraginaceae 111	*tccggttttccgaaaacaaacaaaagttgaaaaagaaaaaag	0	0	0	0	0	0	0	0	0	0	0	0	0	0	0	0	0	0	0	0	0	0	0	0	0	0	0	0	0	0	179944	0	0	0	0	0	0	0	0	0	0	0	0	0	0	0	0
subset:6726	Populus	atcctatttttcgaaaacaaacaaaaaaacaaacaaaggttcataaagacagaataagaatacaaaag	0	0	0	0	0	0	0	0	0	0	0	0	0	0	0	0	0	504286	0	0	0	0	0	221631	0	8.25E-05	0	0	0	0	0	0	0	0	2.08E-05	0	0	7.73E-05	3191328	0	0	22968	0	0	0	0	0
subset:6821	Lonicera nigra	atccagttttccgaaaataagggtttagaaagcaaaaatcaaaaag	0	0	0	0	0	0	0	0	0	0	0	0	0	0	0	0	0	0	0	0	0	0	0	0	0	0	0	0	0	0	0	0	4.06E-05	0	9.65E-05	9.85E-05	6.78E-05	0	9.80E-06	0	0	0	0	0	0	0	0
subset:6930	Erucastrum	atcctaggttacgcgaacaaaccagagtttagaaagcgg	0	0	0	0	0	0	0	0	0	0	0	0	0	0	0	0	0	0	0	0	0	0	0	0	0	0	0	0	0	0	0	0	0	0	0	0	0	0	0	0	0	0	0	0	0	0	0
subset:6965	Picea abies	atccggttcatggagacaatagtttcttcttttattctcctaagataggaaggg	0	0	0	62149426	0	0	0	0	0	0	0	0	0	0	0	185367	238592	1956631	1421255	990976	2572813	44379	3598328	308349	2248526	1029302	200281	587965	1647314	4958417	14343514	12887491	8832962	10082152	24595847	12688594	11998827	5515504	5817836	25038637	415251302	53464678	32817677	21194684	49174113	79744972	8916911
subset:697	Asterales 5	atcacgttttccgaaaacaaacaaaggttcagaaagtgaaaataaaaaag	0	0	0	0	0	0	0	0	0	0	0	0	0	0	0	0	0	0	0	0	0	0	0	0	0	0	0	0	0	0	0	0	0	7.48E-05	0	0	0	0	0	0	0	0	9.43E-05	0	0	0	0
subset:6991	Campanulaceae 111	atccggttttctgacaataacaaaaggttcagaaagcgaaaatcaaaaag	0	0	0	0	0	0	0	0	0	0	0	0	0	0	0	3966843	4016219	2126829	3096922	5569912	6580333	7752655	6525781	6307837	3540972	12863958	4036496	66499	15495	2946558	1426917	2429643	2181238	181395	2229126	2481955	45552	380188	236641	0	850941	492415	403031	9.38E-05	2573868	0	6127748
subset:7001	Crepis bocconi	atcacgttttccgaaaacaaacaaagattcagaaagcaaaaatcaaaaag	0	0	0	0	0	0	0	0	0	0	0	0	0	0	0	0	0	0	0	0	0	0	0	0	0	0	0	0	0	0	0	0	0	0	0	0	0	1.78E-05	0	0	0	0	0	0	0	0	0
subset:709	Gnaphalium	atcacgttttccgaaaacaaacaaaggttcagaaagcgaaaaaaaaaag	0	0	0	0	0	0	0	0	0	0	0	0	0	0	0	0	0	0	0	0	0	0	0	0	251101	6.76E-05	0	141964	123433	0	0	0	7.85E-05	934701	6.25E-05	0	0	0	0	0	0	0	0	0	0	0	0
subset:711	Asteraceae 50	atcacgttttccgaaaacaaacaaaggttcagaaagcgaaaaaaaaaaa	0	0	0	0	0	0	0	0	0	0	0	0	0	0	0	0	0	0	0	0	0	0	0	0	0	0	0	0	0	0	0	0	0	0	0	0	0	0	0	0	0	0	0	0	0	0	0
subset:719	Asterales 1	atcacgttttccgaaaacaaacaaaagttcagaaagcgaaaataaaaaag	0	0	0	0	0	0	0	0	0	0	0	0	0	0	0	0	0	0	0	0	0	0	0	0	7.24E-05	0	0	0	0	0	0	0	0	0	0	0	0	0	0	0	0	0	0	0	0	0	0
subset:724	Oxalis acetosella	atcctcttttccgaaaacaaacaaagttttcgaaagcgagaataaaaaag	0	0	0	0	0	0	0	0	0	0	0	0	0	0	0	0	0	0	0	0	0	0	0	0	0	0	0	0	0	0	0	0	0	0	5.85E-05	0	0	373117	0	0	0	0	0	0	0	0	0
subset:7325	Delphinieae 111	atcctgtttttagaaaacaaatcaaaatcaaataaagggttcagaaagcaagaataaaaaag	0	0	0	0	0	0	0	0	0	0	0	0	0	0	0	0	0	9.20E-05	0	0	0	0	0	0	0	4.16E-05	2.45E-05	0	0	0	158326	160122	2.82E-05	536774	398615	0	195116	313311	140261	0	159273	9094	0	5.75E-05	670841	0	506982
subset:7795	Arctostaphylos alpina	atcttttttttttcgaaaataaagaaagattcagaaagcgaaaaaaaag	0	0	0	0	0	0	0	0	0	0	0	0	0	0	0	0	1.66E-05	0	205368	2.75E-05	4.84E-05	0	0	34022	0	0	0	0	2.07E-05	0	136443	106596	4.55E-05	271438	9.35E-05	131399	0	149441	9.80E-06	0	0	2.42E-05	0	0	0	0	0
subset:7897	Asteroideae 11	atcacgttttccgaaaataaacaaaggttcagaaagcgaaaagaaaaaaaaa	0	0	0	0	0	0	0	0	0	0	0	0	0	0	0	0	0	0	0	0	0	0	0	0	0	0	0	0	0	0	0	0	0	0	0	0	0	0	0	0	0	0	0	0	0	0	0
subset:7937	Juncus	atctttcttttgagaaaattcgtttttatagaaaaactagaatcaaaaaa	0	0	0	0	0	0	0	0	0	0	0	0	0	0	0	0	0	0	0	0	0	0	0	0	0	0	0	0	0	0	0	0	0	0	0	0	0	0	0	0	0	0	0	0	0	0	0
subset:7941	Myrtus communis	atcctgttttacgaaaaccaacaaaacaataagggttcataaagcgagaataaaaaag	0	0	0	0	0	0	0	0	0	0	0	0	0	0	0	0	0	0	0	0	0	0	0	0	0	0	0	0	0	0	0	0	0	0	0	0	0	0	0	0	0	0	0	0	0	0	0
subset:7965	Salix	atcctatttttcgaaaacaaacaaaggttcataaagacagaataagaatacaaaag	0	0	0	0	0	0	0	0	0	0	0	0	0	0	0	18771647	8592751	38578729	21726223	25527388	15705535	20727134	8939423	8684262	12532635	3003699	1277625	9632139	940669	6489828	13225845	3832549	2732324	4528777	7815477	8509369	9048311	5729955	18706349	8149781	9173994	22417602	3998905	4060533	29699598	126913655	32098279
subset:7982	Gentiana clusii	atcctatttttgaaaaagcaaaaagaaaggattagaaagaaataaag	0	0	0	0	0	0	0	0	0	0	0	0	0	0	0	0	207696	516262	0	10989	191404	772549	334225	3.73E-05	9.66E-05	17569	9.81E-06	140017	0	9.37E-05	0	0	0	9.56E-05	3.63E-05	0	0	2.47E-05	0	0	0	0	0	0	0	0	0
subset:7985	Poeae	atccgtgttttgagaaaacaagggggttctcgaactagaatacaaaggaaaag	0	0	0	0	0	0	0	0	0	0	0	0	0	0	0	2857056	5064876	180919	737015	136719	116714	0	4718227	1545595	1308431	1770944	323313	1120974	2862481	860361	1507501	1677926	873847	1501784	557714	296996	4.07E-05	253297	6.21E-05	0	332321	135106	271289	221649	1611102	0	1379663
subset:8062	Prunus	atcctgttttattaaaacaaacaagggtttcataaaccgagaataaaaaag	0	0	0	0	0	0	0	0	0	0	0	0	0	0	0	0	0	0	0	0	0	0	243665	0	0	0	0	0	0	0	0	0	0	0	5.19E-05	0	0	2.37E-05	0	0	0	0	0	0	0	0	0
subset:8066	Viburnum lantana	atcctgttttccgaaaacaaacaaagaagcgaaaaaaaaaag	0	0	0	0	0	0	0	0	0	0	0	0	0	0	0	0	0	0	0	0	0	0	0	111045	0	0	0	1.06E-05	0	0	0	0	110788	0	0	0	0	0	0	0	0	0	0	0	0	0	0
subset:8077	Plantago media	atcctgtcttctcaaaataaaggttcataaaacgaaaaggg	0	0	0	0	0	0	0	0	0	0	0	0	0	0	0	0	0	0	706554	0	0	0	0	0	3.93E-05	486011	3.28E-05	190638	8.71E-05	0	0	0	2.31E-05	0	0	0	0	0	0	0	0	0	0	0	0	0	0
subset:8093	Arachis	atcccgttttcggaaaggaaataaacattaagaaagcgagaataaaaaagg	0	0	0	0	0	0	0	0	0	0	0	0	0	0	0	0	0	0	0	0	0	0	0	0	0	0	0	0	0	0	0	0	0	0	0	0	0	0	0	0	0	0	0	0	0	0	0
subset:8144	Alnus alnobetula	atcctgttttccgaaaacaaataaaacaaattgaagggttcataaagcgagactaaaaag	0	0	0	0	0	0	0	0	0	0	0	0	0	0	0	0	0	0	716922	324765	0	0	342153	0	6.85E-05	8.53E-05	0	10036	385618	2417303	16413005	975792	1366251	1527245	10554362	16157841	282923	19513088	24672904	36038496	27108874	112393183	65004255	17372002	80204495	151638876	32966793
subset:8157	Gentiana 1	atcctatttttcgaaaaagcaaaaagaaaggcttagaaagaaatgaaagaaataaag	0	0	0	0	0	0	0	0	0	0	0	0	0	0	0	0	0	0	0	8.24E-05	0	0	0	0	1.96E-05	3.97E-05	0	3.90E-05	0	5.35E-05	334229	3.95E-05	4.62E-05	0	731012	263619	1006594	748756	202829	0	3.39E-05	0	0	6.20E-05	0	0	191216
subset:8285	Cucurbitaceae	atcctttttccgaaaacaaaaaaag	0	0	375	0	0	0	0	0	0	0	0	0	0	0	0	0	0	0	0	0	0	0	0	0	0	0	0	0	0	0	0	0	0	0	0	0	0	0	0	0	0	0	0	0	0	0	0
subset:8354	Carum carvi	atcctatttttcaaaaacaaaggcccagaaggtgaaaaag	0	0	0	0	0	0	0	0	0	0	0	0	0	0	0	75135	638954	2616797	0	1600457	748177	3148615	171943	1070093	403648	1947063	653799	1497889	6.96E-05	5.35E-05	0	0	6.22E-05	0	0	0	0	0	0	0	0	0	0	1.43E-05	0	0	0
subset:8406	Helianthemum nummularium	atcctgttttacgagcaattcaaaaaggaatcaaaaatag	0	0	0	0	0	0	0	0	0	0	0	0	0	0	0	51382167	37170387	57600629	98835803	7260705	44617162	61248928	55081789	73782918	46532589	34703395	18889828	38102563	30923069	49924782	69399758	7231115	47459362	56765516	65788895	18158169	12509936	12387997	12489883	2451701	2987183	266244	18900561	2949882	9076666	0	2235288
subset:8642	Chrysosplenium alternifolium	atcctgttttacgaaaacaaaacacaaaggttcagaaaaagagaataaaaaaaagg	0	0	0	0	0	0	0	0	0	0	0	0	0	0	0	0	0	0	0	0	0	0	0	0	0	0	0	1.77E-05	3.47E-05	0	0	0	0	0	0	0	0	0	0	0	0	0	0	0	0	0	0
subset:8679	Anthoxanthum	atccttgttttgagaaaacaaaagggttctcgaactagaatacaaaggaaaag	0	0	0	0	0	0	0	0	0	0	0	0	0	0	0	0	176596	0	0	238102	0	0	0	0	0	0	0	2.13E-05	7.56E-05	0	165699	9.57E-05	7.51E-05	7.54E-05	8.83E-05	0	0	5.86E-05	0	0	0	0	0	0	0	0	0
subset:8872	Clinopodium acinos	atcctgttttctcaaaacaaaggtttcaaaaaacgaaaaaaag	0	0	0	0	0	0	0	0	0	0	0	0	0	0	0	0	5.27E-05	0	1111307	715604	0	0	0	243987	153106	188711	299522	344504	449621	1721986	3900015	884428	648741	531686	155566	156375	0	0	0	0	0	0	0	0	0	0	0
subset:8949	Polystichum lonchitis	atctttgattaatcaaatgaatttcgggcgatgagacga	0	0	0	0	0	0	0	0	0	0	0	0	0	0	0	0	2.21E-05	450194	161929	224597	0	0	0	0	0	0	0	1.06E-05	0	0	0	0	0	0	0	0	0	0	0	0	0	0	0	0	0	0	0
subset:8972	Asteraceae 15	atcacgttttccgaaaacaaataaaggttcagaaagcgaaaagaaaaaag	0	0	0	0	0	0	0	0	0	0	0	0	0	0	0	0	0	0	0	0	0	0	0	0	0	0	0	0	0	0	0	0	0	0	0	0	0	0	0	0	0	0	0	0	0	0	0
subset:9073	Plantago major	atcctgtcttctcaaaataaaggttcataaagcgaaaaggg	0	0	0	0	0	0	0	0	0	0	0	0	0	0	0	743263	0	0	0	0	0	0	302998	143021	179108	634494	187581	819589	3636879	1023422	101199	284981	4579292	2738349	93228	0	0	0	0	0	0	0	0	7.17E-06	0	0	0
subset:9129	Orobanche 1	atcctattttatcaaaacaaagtttagaaaaataaaaggg	0	0	0	0	0	0	0	0	0	0	0	0	0	0	0	0	0	0	0	0	0	0	0	0	0	0	0	0	0	0	0	0	0	0	0	0	0	0	0	0	0	0	0	0	0	0	0
subset:9156	Cornus sanguinea	atcctgttttccgaaaacaaacaaaagttcagaaagcgaaaataaaaaaag	0	0	0	0	0	0	0	0	0	0	0	0	0	0	0	0	0	0	575904	0	0	0	0	0	0	8.23E-06	0	0	0	5.00E-05	0	2.37E-05	0	186256	0	0	0	0	0	0	0	0	0	7.39E-05	0	0	0
subset:9324	Vicia sylvatica	atccttctttccgaaaacaaacaaataaaagttcagaaagttaaaatcaaaaag	0	0	0	0	0	0	0	0	0	0	0	0	0	0	0	0	0	0	0	0	0	0	0	0	0	0	0	0	0	0	0	0	0	0	0	0	0	0	0	0	0	0	0	0	0	0	0
subset:950	Cuscuta europaea	atccttttgaaaaaacttaaag	0	0	0	0	0	0	0	0	0	0	0	0	0	0	0	0	3.09E-05	0	0	0	0	0	0	0	0	0	0	0	0	0	0	0	0	0	0	0	0	0	0	0	0	0	0	0	0	0	0
subset:9569	Cerastium fontanum	ctccttaattgtctcctaaaaaaaacggattcaaaaagaataaaaaag	0	0	0	0	0	0	0	0	0	0	0	0	0	0	0	0	2.21E-05	0	0	0	0	0	151883	0	0	8.23E-06	0	0	0	0	5.77E-05	193899	0	0	0	0	0	0	0	0	0	0	0	0	0	0	0
subset:9580	Dactylis glomerata	atccgtgttttgagaaaacaaagaaaggggttctcgaactagaatacaaaggaaaag	0	0	0	0	0	0	0	0	0	0	0	0	0	0	0	0	0	0	0	0	0	0	0	0	0	0	7.57E-06	0	0	5.00E-05	514595	13124	2.16E-05	236967	254582	5.33E-05	636558	688536	305455	0	298338	1297282	276176	146739	1980671	0	74804
subset:9581	Asteroideae 10	atcacgttttccgaaaacaaacaaaggttcagaaaacgaaaaaaag	0	0	0	0	0	0	0	0	0	0	0	0	0	0	0	0	6.66E-05	7.83E-06	0	9.92E-06	2.99E-05	0	0	0	0	0	0	0	0	0	0	0	0	0	0	0	0	0	0	0	0	0	0	0	0	0	0
subset:9584	Tilia	atcctattattttacgaaaaaaaaacaaaggttcagcaagcgagaataataaaaagaag	0	0	0	0	0	0	0	0	0	0	0	0	0	0	0	0	0	0	0	0	0	0	0	0	0	2.38E-05	0	0	0	0	0	0	0	0	0	6.34E-05	0	0	0	0	0	0	0	0	0	0	0
subset:9603	Soldanella	atcctctttttagaaaacaaagttttaagtaaactaaaaag	0	0	0	0	0	0	0	0	0	0	0	0	0	0	0	133291	207286	1097986	0	693889	0	743947	0	0	6.54E-05	6.77E-05	133771	9.19E-05	0	0	35129	8.97E-05	122904	0	0	0	255232	5.86E-05	0	0	0	0	6.85E-05	0	0	0	118223
subset:9608	Rosoideae 111	atcccgttttatgaaaacaaacaagggtttcagaaagcgagaataaataaag	0	0	0	0	0	0	0	0	0	0	0	0	0	0	0	0	6.27E-05	1477566	0	0	0	0	0	249403	677096	1114358	551274	211979	36333	260196	4736474	2618581	593833	1418603	5131986	4962299	10055808	6194867	6715326	0	138037	2738559	949164	717633	1328622	0	1725828
subset:9639	Saxifraga 9	atcctgttttaagaaagcaaaacacaagggttcagaaaaagaaaaaaaaaaaag	0	0	0	0	0	0	0	0	0	0	0	0	0	0	0	0	0	0	0	0	0	0	0	0	0	0	0	0	1.73E-05	0	0	0	0	0	0	0	0	0	0	0	0	0	0	0	0	0	1.20E-05
subset:9663	Plantago alpina	atcctgtcttctccaaataaaggttcagaaagcgaaaaggg	0	0	0	0	0	0	0	0	0	0	0	0	0	0	0	31930955	13146034	6258198	61871445	6447696	54975062	12163348	31229581	53838365	36333695	11819172	5718096	24209673	27288059	16780734	4823966	7965257	21621116	6111019	5041322	37932	1072854	1424276	511035	0	379795	258442	10887703	488066	0	0	2378479
subset:9865	Vaccinium uliginosum 111	atccttctttttggcaaacaaataaagattccgaaagaaataagg	0	0	0	0	0	0	0	0	0	0	0	0	0	0	0	1039882	31304	1251564	0	444635	0	2603198	541747	126684	223039	5.33E-05	0	4.60E-05	1475382	1042012	1388436	2246682	582265	882498	5102657	3135096	12847975	1755543	1242426	367323	3083266	1245342	2569557	483959	292642	0	2442098
[truncated: 529 more columns]

## Sheet: S2
		Functional group	Family/order	Rank	DNA	Pollen								Functional group	Family/order	Rank	DNA	Pollen
		shrub	Adoxaceae	species		Sambucus nigra-type								Forbs	Asteraceae	genus	Achillea	Achillea-type
		shrub		genus	Sambucus									Forbs		genus		Agrimonia-type
		shrub		species	Viburnum lantana									Forbs	Rosaceae	genus	Alchemilla (x2)	Alchemilla
		shrub		genus		Viburnum								Forbs		genus		Allium-type
Contamination		Forbs	Amaryllidaceae	species	Allium victorialis									Forbs		genus		Ambrosia
		Forbs		genus		Allium-type								Forbs	Primulaceae	genus	Androsace	Androsace
Family		Forbs	Apiaceae	family	Apioideae (x5)	Apiaceae indet								Forbs	Ranunculaceae	genus	Anemone	Anemone
Genus		Forbs		genus	Astrantia									Forbs	Apiaceae	family	Apioideae (x5)	Apiaceae indet
Species		Forbs		species	Athamanta cretensis									Forbs		genus		Apium
Other		Forbs		genus	Bupleurum (x2)	Bupleurum-type								Forbs		genus		Arctium
		Forbs		species	Carum carvi									Forbs		genus		Artemisia
		Forbs		genus	Chaerophyllum	Chaerophyllum-type								Forbs		genus		Aster-type
		Forbs		species	Chaerophyllum aureum									Forbs		family		Asteroideae
		Forbs		genus	Eryngium	Eryngium								Forbs		genus		Bartsia-type
		Forbs		species	Meum athamanticum									Forbs		family	Brassicaceae	Brassicaceae
		Forbs		species	Peucedanum austriacum									Forbs		genus	Bupleurum (x2)	Bupleurum-type
		Forbs		genus	Pimpinella	Pimpinella								Forbs		genus		Caltha
		Forbs		genus	Sanicula									Forbs	Campanulaceae	genus	Campanula	Campanula
		Forbs		family	Scandicinae									Forbs		species		Cannabis sativa
		Forbs		genus		Apium								Forbs		genus		Carduus-type
		Forbs		species		Daucus carota								Forbs		family		Caryophyllaceae indet
		Forbs		genus		Falcaria								Forbs		species		Centaurea jacea-type
		Forbs		genus		Heracleum								Forbs	Caryophyllaceae	genus	Cerastium (x2)	Cerastium
		Forbs		genus		Laserpitium								Forbs		genus	Chaerophyllum	Chaerophyllum-type
		Forbs		species		Ligusticum mutellina								Forbs	Chenopodiaceae	family		Chenopodiaceae
		Forbs		genus		Oenanthe								Forbs		family		Cichorioideae
		Forbs		species		Orlaya grandiflora								Forbs		genus		Cirsium
		Forbs		genus		Peucedanum-type								Forbs			Euphyllophyta	clade
		Forbs		species		Torilis arvensis								Forbs		species		Convolvulus arvensis-type
		Forbs		species		Torilis japonica								Forbs	Papaveraceae	species		Corydalis cava-type
		Forbs	Araliaceae	species		Hedera helix								Forbs		species		Daucus carota
		Forbs	Asteraceae	genus	Achillea	Achillea-type								Forbs	Dipsacaceae	family		Dipsacaceae indet
		Forbs		species	Achillea atrata									Forbs		genus		Echium
		Forbs		species	Achillea macrophylla									Forbs		genus	Eryngium	Eryngium
		Forbs		family	Anthemideae									Forbs		genus	Euphrasia (x2)	Euphrasia
		Forbs		family	Asteraceae (x17)									Forbs		family		Fabaceae indet
		Forbs		family	Asteroideae (x4)									Forbs		genus		Falcaria
		Forbs		order	Asterales (x6)									Forbs		genus		Filipendula
		Forbs		clade	asterids									Forbs	Rubiaceae	genus	Galium	Galium
		Forbs		genus		Carduus-type								Forbs		species		Gentiana pneumonanthe-type
		Forbs		family	Carduinae									Forbs		genus		Geranium
		Forbs		species	Carlina acaulis subsp. caulescens									Forbs		genus	Geum	Geum
		Forbs		family		Cichorioideae								Forbs		genus		Gnaphalium-type
		Forbs		species	Cirsium arvense									Forbs		species		Gypsophila repens-type
		Forbs		genus		Cirsium								Forbs	Araliaceae	species		Hedera helix
		Forbs		genus	Crepis									Forbs		genus		Heracleum
		Forbs		species	Crepis bocconi									Forbs	Cannabaceae	species		Humulus lupulus
		Forbs		species	Crepis paludosa									Forbs	Hypericaceae	genus	Hypericum	Hypericum
		Forbs		species	Crepis rhaetica									Forbs		genus		Jasione
		Forbs		genus	Doronicum									Forbs		family		Lamiaceae indet
		Forbs		genus		Gnaphalium-type								Forbs		genus		Laserpitium
		Forbs		family	Hieraciinae (x2)									Forbs		genus		Lathyrus-type
		Forbs		species	Hypochaeris maculata									Forbs		species		Ligusticum mutellina
		Forbs		genus	Jurinea									Forbs		genus		Melampyrum
		Forbs		species	Leucanthemopsis alpina									Forbs		genus		Mentha-type
		Forbs		genus	Saussurea									Forbs		species		Mercurialis annua
		Forbs		genus	Leontodon									Forbs		species		Mercurialis perennis
		Forbs		species	Leontodon autumnalis									Forbs		genus		Odontites-type
		Forbs		species	Leontodon hispidus									Forbs		genus		Oenanthe
		Forbs		genus		Scorzonera								Forbs		species		Orlaya grandiflora
		Forbs		genus		Senecio-type								Forbs		genus		Papaver
		Forbs		family	Senecioneae									Forbs		genus		Peucedanum-type
		Forbs		genus		Ambrosia								Forbs		genus	Pimpinella	Pimpinella
		Forbs		genus		Arctium								Forbs		species		Plantago alpina
		Forbs		genus		Artemisia								Forbs		species		Plantago lanceolata
		Forbs		genus		Aster-type								Forbs		species	Plantago major	Plantago major
		Forbs		family		Asteroideae								Forbs		species	Plantago media	Plantago media
		Forbs		species		Centaurea jacea-type								Forbs		species		Polygonum aviculare-type
		Forbs		species		Tussilago farfara								Forbs		genus	Potentilla (x3)	Potentilla-type
		tree	Betulaceae	genus	Alnus									Forbs		genus	Rhinanthus	Rhinanthus-type
		tree		species		Alnus glutinosa-type								Forbs		family		Rosaceae
		tree		species	Alnus alnobetula									Forbs		species		Rumex acetosa-type
		tree		species		Alnus viridis								Forbs		species		Rumex alpinus
		tree		genus	Betula	Betula								Forbs		genus	Sagina	Sagina
		tree		family	Betulaceae									Forbs		species		Saxifraga aizoides-type
		tree		species		Carpinus betulus								Forbs		species		Saxifraga granulata
		tree		species		Corylus avellana								Forbs		species		Scabiosa columbaria-type
		Forbs	Boraginaceae	family	Boraginaceae (x2)									Forbs		genus		Scorzonera
		Forbs		family	Lithospermeae									Forbs		genus		Sedum-type
		Forbs		genus	Myosotis									Forbs		genus		Senecio-type
		Forbs		species	Myosotis arvensis									Forbs		species		Silene dioica
		Forbs		genus		Echium								Forbs		species	Silene vulgaris	Silene vulgaris
		Forbs	Brassicaceae	genus	Arabis (x3)									Forbs		genus		Solanum
		Forbs		family	Brassicaceae	Brassicaceae								Forbs		genus		Stachys
		Forbs		family	Cardamineae									Forbs		genus		Succisa-type
		Forbs		genus	Erucastrum									Forbs		genus	Thalictrum	Thalictrum
		Forbs		species	Pritzelago alpina									Forbs		species		Torilis arvensis
		Forbs	Campanulaceae	genus	Campanula	Campanula								Forbs		species		Torilis japonica
		Forbs		species	Campanula thyrsoides									Forbs		species		Trifolium pratense-type
		Forbs		family	Campanulaceae									Forbs		species		Trifolium repens-type
		Forbs		clade	campanulids									Forbs		genus		Triticum-type
		Forbs		genus	Phyteuma									Forbs		genus		Trollius
		Forbs		genus		Jasione								Forbs		species		Tussilago farfara
		Forbs	Cannabaceae	species		Humulus lupulus								Forbs		genus		Urtica
		Forbs		species		Cannabis sativa								Forbs		species		Valeriana montana-type
		shrub	Caprifoliaceae	family	Knautia	Knautia								Forbs		species		Valeriana officinalis-type
		Forbs		genus	Lonicera									Forbs		genus		Veronica-type
		shrub		species	Lonicera alpigena	Lonicera alpigena								Forbs		species	Achillea atrata
		shrub		species	Lonicera nigra									Forbs		species	Achillea macrophylla
		shrub		genus	Scabiosa									Forbs	Lamiaceae	genus	Ajuga
		Forbs		species		Scabiosa columbaria-type								Forbs	Amaryllidaceae	species	Allium victorialis
		Forbs		genus	Valeriana (x2)									Forbs		species	Androsace chamaejasme
		Forbs		genus		Succisa-type								Forbs		species	Anemone narcissiflora
		Forbs	Caryophyllaceae	genus	Cerastium (x2)	Cerastium								Forbs		family	Anthemideae
		Forbs		species	Cerastium cerastoides									Forbs	Fabaceae	species	Anthyllis vulneraria
		Forbs		genus	Gypsophila									Forbs	Brassicaceae	genus	Arabis (x3)
		Forbs		species		Gypsophila repens-type								Forbs		family	Asteraceae (x17)
		Forbs		genus	Moehringia									Forbs		order	Asterales (x6)
		Forbs		genus	Sagina	Sagina								Forbs		clade	asterids
		Forbs		genus	Silene									Forbs		family	Asteroideae (x4)
		Forbs		species		Silene dioica								Forbs		genus	Astragalus
		Forbs		species	Silene acaulis									Forbs		species	Astragalus alpinus
		Forbs		species	Silene vulgaris	Silene vulgaris								Forbs		genus	Astrantia
		Forbs		species	Stellaria nemorum									Forbs		species	Athamanta cretensis
		Forbs		family		Caryophyllaceae indet								Forbs	Orobanchaceae	species	Bartsia alpina
		Forbs	Celastraceae	species	Parnassia palustris									Forbs	Polygonaceae	species	Bistorta officinalis
		Forbs	Chenopodiaceae	family		Chenopodiaceae								Forbs	Boraginaceae	family	Boraginaceae (x2)
		shrub	Cistaceae	genus	Helianthemum (x2)	Helianthemum								Forbs	Plantaginaceae	species	Callitriche palustris
		Forbs	Convolvulaceae	family	Convolvuleae									Forbs		species	Caltha palustris
		Forbs		species		Convolvulus arvensis-type								Forbs		species	Campanula thyrsoides
		Forbs		species	Cuscuta europaea									Forbs		family	Campanulaceae
		shrub	Cornaceae	genus	Cornus									Forbs		clade	campanulids
		shrub		species		Cornus sanguinea								Forbs		family	Cardamineae
		Forbs	Crassulaceae	family	Crassulaceae									Forbs		family	Carduinae
		Forbs		species	Sedum album									Forbs		species	Carlina acaulis subsp. caulescens
		Forbs		genus		Sedum-type								Forbs		species	Carum carvi
		Forbs	Cucurbitaceae		Cucurbitaceae									Forbs		species	Cerastium cerastoides
		Forbs		species	Sicyos angulatus									Forbs		species	Chaerophyllum aureum
		tree	Cupressaceae	family	Cupressaceae (x3)									Forbs	Onagraceae	species	Chamaenerion angustifolium
		tree		genus		Juniperus								Forbs	Saxifragaceae	species	Chrysosplenium alternifolium
		Graminoid	Cyperaceae	genus	Carex (x3)									Forbs		species	Cirsium arvense
		Graminoid		species	Carex caryophyllea									Forbs		genus	Clinopodium
		Graminoid		species	Carex frigida									Forbs		species	Clinopodium acinos
		Graminoid		species	Carex parviflora									Forbs		species	Comarum palustre
		Graminoid		family		Cyperaceae								Forbs	Convolvulaceae	family	Convolvuleae
		Forbs	Dipsacaceae	family		Dipsacaceae indet								Forbs	Crassulaceae	family	Crassulaceae
		shrub	Elaeagnaceae	species	Hippophae rhamnoides	Hippophaë rhamnoides								Forbs		genus	Crepis
		shrub	Ericaceae	species	Arctostaphylos uva-ursi (x2)									Forbs		species	Crepis bocconi
		shrub		species	Arctostaphylos alpina									Forbs		species	Crepis paludosa
		shrub		species	Calluna vulgaris	Calluna vulgaris								Forbs		species	Crepis rhaetica
		shrub		species	Empetrum nigrum									Forbs	Iridaceae	family	Crocoideae
		shrub		species	Erica carnea									Forbs	Cucurbitaceae		Cucurbitaceae
		shrub		species	Kalmia procumbens									Forbs		species	Cuscuta europaea
		shrub		species	Rhododendron hirsutum									Forbs	Orchidaceae	species	Dactylorhiza incarnata
		shrub		genus		Rhododendron								Forbs		family	Delphinieae
		shrub		genus		Vaccinium-type								Forbs		genus	Delphinium
		shrub		species	Vaccinium myrtillus									Forbs		genus	Doronicum
		shrub		species	Vaccinium uliginosum									Forbs		genus	Epilobium (x3)
		shrub		species	Vaccinium vitis-idaea									Forbs		genus	Epipactis
		shrub	Ephedraceae	species		Ephedra distachya-type								Forbs		species	Erinus alpinus
		shrub		species		Ephedra fragilis-type								Forbs		genus	Erucastrum
		Forbs	Euphorbiaceae	genus	Euphorbia sect. Esula									Forbs	Euphorbiaceae	genus	Euphorbia sect. Esula
		Forbs		species		Mercurialis annua								Forbs		tribe	Fabeae
		Forbs		species		Mercurialis perennis								Forbs	Gentianaceae		Gentiana (x2)
		Forbs	Fabaceae	species	Anthyllis vulneraria									Forbs		species	Gentiana clusii
		Forbs		genus	Astragalus									Forbs		genus	Gentianella
		Forbs		species	Astragalus alpinus									Forbs		species	Gentianopsis ciliata
		Forbs		tribe	Fabeae									Forbs	Geraniaceae	species	Geranium sylvaticum
		Forbs		family		Fabaceae indet								Forbs		genus	Globularia
		Forbs		species	Hedysarum hedysaroides									Forbs		species	Globularia cordifolia
		Forbs		species	Hippocrepis comosa									Forbs		species	Gymnadenia conopsea
		Forbs		species	Lathyrus pratensis									Forbs		genus	Gypsophila
		Forbs		genus		Lathyrus-type								Forbs		species	Hedysarum hedysaroides
		Forbs		genus	Lotus									Forbs		family	Hieraciinae (x2)
		Forbs		genus	Onobrychis									Forbs		species	Hippocrepis comosa
		Forbs		genus	Oxytropis									Forbs		species	Hypochaeris maculata
		Forbs		genus	Trifolium (x3)									Forbs		genus	Jurinea
		Forbs		genus	Vicia									Forbs		subfamily	Lamioideae
		Forbs		species	Vicia sylvatica									Forbs		species	Lathyrus pratensis
		Forbs		species		Trifolium pratense-type								Forbs		genus	Leontodon
		Forbs		species		Trifolium repens-type								Forbs		species	Leontodon autumnalis
		Forbs		genus		Triticum-type								Forbs		species	Leontodon hispidus
					Arachis									Forbs		species	Leucanthemopsis alpina
		tree	Fagaceae	species	Castanea sativa	Castanea sativa								Forbs	Liliaceae	species	Lilium martagon
		tree		genus	Quercus (x2)									Forbs		genus	Linaria
		tree		species		Quercus robur-pubescens-type								Forbs	Linaceae	species	Linum catharticum
		tree		species		Fagus sylvatica								Forbs		family	Lithospermeae
		Forbs	Gentianaceae		Gentiana (x2)									Forbs		genus	Lonicera
		Forbs		species		Gentiana pneumonanthe-type								Forbs		genus	Lotus
		Forbs		species	Gentiana clusii									Forbs		species	Lysimachia nemorum
		Forbs		genus	Gentianella									Forbs		species	Melampyrum sylvaticum
		Forbs		species	Gentianopsis ciliata									Forbs		tribe	Mentheae (x2)
		Forbs	Geraniaceae	species	Geranium sylvaticum									Forbs		species	Meum athamanticum
		Forbs		genus		Geranium								Forbs		genus	Moehringia
		Forbs	Hypericaceae	genus	Hypericum	Hypericum								Forbs		genus	Myosotis
		Forbs	Iridaceae	family	Crocoideae									Forbs		species	Myosotis arvensis
		tree	Juglandaceae	species	Juglans regia	Juglans regia								Forbs		genus	Oenothera
		Graminoid	Juncaceae	genus	Juncus (x3)									Forbs		species	Oenothera rosea
		Graminoid		genus	Luzula (x3)									Forbs		genus	Onobrychis
		Forbs	Lamiaceae	genus	Ajuga									Forbs		family	Orchidinae
		Forbs		genus	Clinopodium									Forbs	Rhamnaceae	species	Oreoherzogia
		Forbs		species	Clinopodium acinos									Forbs		genus	Orobanche (x2)
		Forbs		subfamily	Lamioideae									Forbs	Oxalidaceae	genus	Oxalis
		Forbs		family		Lamiaceae indet								Forbs		genus	Oxytropis
		Forbs		tribe	Mentheae (x2)									Forbs		genus	Paederota
		Forbs		genus		Mentha-type								Forbs		species	Parentucellia latifolia
		Forbs		genus	Prunella									Forbs	Celastraceae	species	Parnassia palustris
		Forbs		species	Teucrium montanum									Forbs		genus	Pedicularis (x2)
		Forbs		species	Ziziphora capitata									Forbs		species	Pedicularis oederi
		Forbs		genus		Stachys								Forbs		species	Pedicularis verticillata
			Lauraceae		Persea									Forbs		species	Peucedanum austriacum
		Forbs	Lentibulariaceae	species	Pinguicula alpina									Forbs		genus	Phyteuma
		Forbs	Liliaceae	species	Lilium martagon									Forbs	Lentibulariaceae	species	Pinguicula alpina
		Forbs		family		Liliaceae indet								Forbs		genus	Plantago (x2)
		Forbs	Linaceae	species	Linum catharticum									Forbs	Polygalaceae	species	Polygala chamaebuxus
			Lythraceae	genus		Lythrum								Forbs		genus	Polygonum
		tree	Malvaceae	genus	Tilia	Tilia								Forbs		genus	Primula (x3)
		Forbs	Melanthiaceae	species	Veratrum album									Forbs		species	Pritzelago alpina
			Myrtaceae		Myrtaceae									Forbs		genus	Prunella
			Myrtaceae		Myrtoideae									Forbs		species	Rhinanthus alectorolophus subsp. freynii
		shrub	Myrtaceae	species	Myrtus communis									Forbs		genus	Rumex
		tree		genus		Eucalyptus								Forbs		species	Rumex scutatus
			Musaceae		Musa ornata									Forbs	Rutaceae	family	Rutaceae
					Musaceae									Forbs		genus	Sanicula
		tree	Oleaceae	family	Oleeae									Forbs		genus	Saussurea
		tree		species		Fraxinus excelsior-type								Forbs		genus	Saxifraga (x8)
		Forbs	Onagraceae	species	Chamaenerion angustifolium									Forbs		species	Saxifraga cotyledon
		Forbs		genus	Epilobium (x3)									Forbs		species	Saxifraga rosacea
		Forbs		genus	Oenothera									Forbs		species	Saxifraga rotundifolia
		Forbs		species	Oenothera rosea									Forbs		species	Saxifraga stellaris
		Forbs	Orchidaceae	species	Dactylorhiza incarnata									Forbs		family	Scandicinae
		Forbs		genus	Epipactis									Forbs		species	Sedum album
		Forbs		species	Gymnadenia conopsea									Forbs		family	Senecioneae
		Forbs		family	Orchidinae									Forbs		species	Sibbaldia procumbens
		Forbs	Orobanchaceae	species	Bartsia alpina									Forbs		species	Sicyos angulatus
		Forbs		genus		Bartsia-type								Forbs		genus	Silene
		Forbs		genus	Euphrasia (x2)	Euphrasia								Forbs		species	Silene acaulis
		Forbs		species	Melampyrum sylvaticum									Forbs	Solanaceae		Solanaceae
		Forbs		genus		Melampyrum								Forbs			Solanoideae
		Forbs		genus	Orobanche (x2)									Forbs		genus	Soldanella
		Forbs		species	Parentucellia latifolia									Forbs		species	Stellaria nemorum
		Forbs		genus	Pedicularis (x2)									Forbs		species	Teucrium montanum
		Forbs		species	Pedicularis oederi									Forbs	Thesiaceae	species	Thesium alpinum
		Forbs		species	Pedicularis verticillata									Forbs		species	Tozzia alpina
		Forbs		genus	Rhinanthus	Rhinanthus-type								Forbs		genus	Trifolium (x3)
		Forbs		species	Rhinanthus alectorolophus subsp. freynii									Forbs		species	Trollius europaeus
		Forbs		species	Tozzia alpina									Forbs	Urticaceae	species	Urtica dioica
		Forbs		genus		Odontites-type								Forbs		genus	Valeriana (x2)
		Forbs	Oxalidaceae	genus	Oxalis									Forbs	Valerianaceae	genus	Valeriana (x2)
		Forbs	Papaveraceae	species		Corydalis cava-type								Forbs	Melanthiaceae	species	Veratrum album
		Forbs		genus		Papaver								Forbs		species	Veronica
		tree	Pinaceae	species	Abies alba	Abies alba								Forbs		species	Veronica cymbalaria
		tree		species	Picea abies	Picea abies								Forbs		species	Veronica serpyllifolia
		tree		genus	Pinus									Forbs		species	Veronica subgen. Beccabunga
		tree		species		Pinus cembra-type								Forbs		species	Veronica subgen. Veronica (x2)
		tree		species		Pinus sylvestris-type								Forbs		genus	Vicia
		tree		species		Larix decidua								Forbs		species	Vicia sylvatica
		Forbs	Plantaginaceae	species	Callitriche palustris									Forbs	Violaceae	species	Viola biflora
		Forbs		species	Erinus alpinus									Forbs		species	Ziziphora capitata
		Forbs		genus	Globularia									Graminoid		genus		Cerealia-type indet
		Forbs		species	Globularia cordifolia									Graminoid		family		Cyperaceae
		Forbs		genus	Linaria									Graminoid		genus		Hordeum-type
		Forbs		genus	Paederota									Graminoid		family	Poaceae	Poaceae
		Forbs		genus	Plantago (x2)									Graminoid		genus		Secale
		Forbs		species		Plantago alpina								Graminoid		species		Zea mays
		Forbs		species		Plantago lanceolata								Graminoid	Poaceae	family	Agrostidinae
		Forbs		species	Plantago major	Plantago major								Graminoid		genus	Anthoxanthum
		Forbs		species	Plantago media	Plantago media								Graminoid		species	Avenella flexuosa
		Forbs		species	Veronica									Graminoid		subtribe	Aveninae
		Forbs		species	Veronica cymbalaria									Graminoid		species	Avenula pubescens
		Forbs		species	Veronica serpyllifolia									Graminoid		genus	Calamagrostis
		Forbs		species	Veronica subgen. Beccabunga									Graminoid	Cyperaceae	genus	Carex (x3)
		Forbs		species	Veronica subgen. Veronica (x2)									Graminoid		species	Carex caryophyllea
		Forbs		genus		Veronica-type								Graminoid		species	Carex frigida
		Graminoid	Poaceae	family	Agrostidinae									Graminoid		species	Carex parviflora
		Graminoid		genus	Anthoxanthum									Graminoid		subtribe	Dactylidinae
		Graminoid		species	Avenella flexuosa									Graminoid		genus	Deschampsia
		Graminoid		subtribe	Aveninae									Graminoid		species	Deschampsia cespitosa
		Graminoid		species	Avenula pubescens									Graminoid		genus	Festuca
		Graminoid		genus	Calamagrostis									Graminoid		species	Festuca pratensis
		Graminoid		subtribe	Dactylidinae									Graminoid		species	Helictochloa versicolor
		Graminoid		genus	Deschampsia									Graminoid	Juncaceae	genus	Juncus (x3)
		Graminoid		species	Deschampsia cespitosa									Graminoid		genus	Luzula (x3)
		Graminoid		genus	Festuca									Graminoid		species	Melica nutans
		Graminoid		species	Festuca pratensis									Graminoid		species	Nardus stricta
		Graminoid		species	Helictochloa versicolor									Graminoid		genus	Poa
		Graminoid		species	Melica nutans									Graminoid		tribe	Poeae (x2)
		Graminoid		species	Nardus stricta									Graminoid		tribe	Poeae Chloroplast Group 2 (Poeae type)
		Graminoid		genus	Poa									Graminoid		subtribe	Poinae
		Graminoid		family	Poaceae	Poaceae								Graminoid		tribe	Triticeae
		Graminoid		tribe	Poeae (x2)
		Graminoid		tribe	Poeae Chloroplast Group 2 (Poeae type)
		Graminoid		subtribe	Poinae
		Graminoid		tribe	Triticeae
		Graminoid		genus		Hordeum-type
		Graminoid		genus		Cerealia-type indet
		Graminoid		genus		Secale
		Graminoid		species		Zea mays
		Forbs	Polygalaceae	species	Polygala chamaebuxus
		Forbs	Polygonaceae	species	Bistorta officinalis
		Forbs		genus	Polygonum
		Forbs		species		Polygonum aviculare-type
		Forbs		genus	Rumex
		Forbs		species		Rumex alpinus
		Forbs		species		Rumex acetosa-type
		Forbs		species	Rumex scutatus
		Aquatics	Potamogetonaceae	genus	Potamogeton	Potamogeton
		Aquatics		species	Potamogeton alpinus
		Aquatics		genus	Stuckenia
		Forbs	Primulaceae	genus	Androsace	Androsace
		Forbs		species	Androsace chamaejasme
		Forbs		species	Lysimachia nemorum
		Forbs		genus	Primula (x3)
		Forbs		genus	Soldanella
		Forbs	Ranunculaceae	genus	Anemone	Anemone
		Forbs		species	Anemone narcissiflora
		Forbs		species	Caltha palustris
		Forbs		genus		Caltha
		Forbs		family	Delphinieae
		Forbs		genus	Delphinium
		Aquatics		genus	Ranunculus (x5)
		Aquatics		species		Ranunculus acris-type
		Aquatics		species	Ranunculus glacialis
		Aquatics		species	Ranunculus parviflorus
		Forbs		genus	Thalictrum	Thalictrum
		Forbs		species	Trollius europaeus
		Forbs		genus		Trollius
		Forbs	Rhamnaceae	species	Oreoherzogia
		Forbs	Rosaceae	genus	Alchemilla (x2)	Alchemilla
		Forbs		species	Comarum palustre
		shrub		species	Dryas octopetala	Dryas octopetala
		Forbs		genus	Geum	Geum
		shrub		genus	Maleae
		shrub		genus		Sorbus
		Forbs		genus	Potentilla (x3)	Potentilla-type
		shrub		genus	Prunus	Prunus
		shrub		genus	Rosoideae
		shrub		genus		Rosa
		shrub		species		Sanguisorba minor
		shrub		genus	Rubus	Rubus
		shrub		species	Rubus idaeus
		Forbs		species	Sibbaldia procumbens
		Forbs		family		Rosaceae
		Forbs		genus		Agrimonia-type
		Forbs		genus		Filipendula
		Forbs	Rubiaceae	genus	Galium	Galium
		Forbs	Rutaceae	family	Rutaceae
		tree	Salicaceae	genus	Populus	Populus
		shrub		genus	Salix	Salix
		tree	Sapindaceae	genus	Acer (x2)	Acer
		tree		species		Aesculus hippocastanum
		Forbs	Saxifragaceae	species	Chrysosplenium alternifolium
		Forbs		species		Saxifraga aizoides-type
		Forbs		species	Saxifraga cotyledon
		Forbs		species	Saxifraga rosacea
		Forbs		species	Saxifraga rotundifolia
		Forbs		species	Saxifraga stellaris
		Forbs		genus	Saxifraga (x8)
		Forbs		species		Saxifraga granulata
		Forbs	Solanaceae		Solanaceae
		Forbs			Solanoideae
		Forbs		genus		Solanum
		Forbs	Thesiaceae	species	Thesium alpinum
		shrub	Thymelaeaceae	species	Daphne mezereum
		shrub	Typhaceae	species		Typha latifolia
		tree	Ulmaceae	genus	Ulmus	Ulmus
		Forbs	Urticaceae	species	Urtica dioica
		Forbs		genus		Urtica
		Forbs	Valerianaceae	genus	Valeriana (x2)
		Forbs		species		Valeriana montana-type
		Forbs		species		Valeriana officinalis-type
		Forbs	Violaceae	species	Viola biflora
			Mosses
		Moss	Amblystegiaceae	family	Amblystegiaceae
		Moss	Bartramiaceae	family	Bartramiaceae
		Moss	Brachytheciaceae	family	Brachytheciaceae
		Moss	Bryaceae	family	Bryaceae (x2)
		Moss		genus	Gemmabryum
		Moss	Dicranidae	family	Dicranidae (x2)
		Moss	Funariaceae	genus	Funaria
		Moss	Grimmiaceae	family	Grimmiaceae
		Moss	Polytrichaceae	family	Polytrichaceae
		Moss	Tetraphidaceae	species	Tetraphis pellucida
			Fern
		Fern	Athyriaceae	species	Athyrium distentifolium
		Fern		species	Athyrium filix-femina	Athyrium filix-femina
		Fern	Cystopteridaceae	species	Gymnocarpium dryopteris
		Fern		genus	Cystopteris
		Fern	Aspleniaceae	genus	Asplenium (x2)
		Fern		species	Asplenium trichomanes (x2)
		Fern	Dennstaedtiaceae	species	Pteridium aquilinum	Pteridium aquilinum
		Fern	Dryopteridaceae	genus	Polystichum
		Fern		species	Polystichum lonchitis
		Fern		species		Dryopteris filix-mas
		Fern	Equisetaceae	genus	Equisetum (x2)	Equisetum
		Fern				Monolete
		Fern				Trilete
		Fern	Ophioglossaceae	genus	Botrychium	Botrychium
		Fern		species	Ophioglossum vulgatum
		Fern	Polypodiaceae	genus		Polypodium
		Fern	Selaginellaceae	species		Selaginella selaginoides
		Fern	Sphagnaceae	genus	Sphagnum	Sphagnum
		Fern	Thelypteridaceae	species	Oreopteris limbosperma
		Fern		species		Thelypteris palustris
			Algae
			Aphanizomenonaceae	genus		Aphanizomenon
		Aquatics	Characeae	genus	Chara
		Aquatics	Closteriaceae	species	Closterium baillyanum
		Aquatics	Coleochaetaceae	species	Coleochaete scutata
		Aquatics	Desmidiaceae	species	Cosmarium botrytis
		Aquatics		species	Staurastrum punctulatum
		Aquatics	Montiaceae	genus	Microchloropsis
		Aquatics		genus	Nannochloropsis
		Aquatics		species	Nannochloropsis gaditana
		Aquatics		species	Nannochloropsis granulata
		Aquatics	Nostocaceae	genus		Anabaena
		Aquatics	Peniaceae	species	Penium margaritaceum
			Others
		Forbs			Euphyllophyta	clade

## Sheet: S3
SedaDNA sample name	Depth	mean age	avg_rep (MTQ)	sd_rep	avg_filt_rep (MAQ)	sd_filt_rep	LOI		Pollen sample name	Depth	mean age
EG33_L040	2021-05-13	11	1.00	0.00	1.00	0.00	8.05		SUL-1	0	-74
EG33_L049	2021-05-22	66	0.88	0.00	0.88	0.00	7.59		SUL-2	8	-23
EG33_L058	2021-05-31	120	1.00	0.00	0.99	0.04	7.04		SUL-3	24	75
EG33_L067	40.5	177	1.00	0.00	1.00	0.00	6.88		SUL-4	40	174
EG33_L076	49.5	231	1.00	0.00	0.99	0.04	6.41		SUL-5	56	272
EG33_L085	58.5	288	1.00	0.00	1.00	0.00	6.64		SUL-6	72	376
EG33_L094	67.5	346	0.98	0.08	0.98	0.05	6.36		SUL-7	88	483
EG33_L103	80.5	433	0.98	0.05	0.93	0.06	7.41		SUL-8	104	588
EG33_L112	89.5	492	0.99	0.04	1.00	0.00	7.06		SUL-9	120	702
EG33_L121	98.5	551	1.00	0.00	1.00	0.00	6.47		SUL-10	136	817
EG33_L130	107.5	611	1.00	0.00	1.00	0.00	5.98		SUL-11	152	932
EG33_L139	116.5	677	1.00	0.00	1.00	0.00	5.73		SUL-12	168	1068
EG33_L148	125.5	740	1.00	0.00	0.99	0.04	6.89		SUL-13	184	1207
EG33_L157	134.5	806	1.00	0.00	1.00	0.00	8.81		SUL-14	200	1355
EG33_L166	143.5	870	0.99	0.04	1.00	0.00	7.22		SUL-15	216	1566
EG33_L175	152.5	936	1.00	0.00	1.00	0.00	10.58		SUL-16	232	1772
EG33_L184	161.5	1004	0.95	0.16	1.00	0.00	12.51		SUL-17	247	1971
EG33_L193	170.5	1013	0.99	0.04	1.00	0.00	8.58		SUL-18	264	2229
EG33_L211	160.5	1081	0.93	0.17	0.99	0.04	11.4		SUL-19	272	2354
EG33_L220	169.5	1089	1.00	0.00	1.00	0.00	14.14		SUL-20	280	2474
EG33_L229	178.5	1159	1.00	0.00	1.00	0.00	12.61		SUL-21	288	2609
EG33_L238	187.5	1237	1.00	0.00	1.00	0.00	9.49		SUL-22	296	2742
EG33_L247	188.5	1245	1.00	0.00	1.00	0.00	10.82		SUL-23	304	2877
EG33_L256	197.5	1328	1.00	0.00	1.00	0.00	13.59		SUL-24	312	3002
EG33_L265	206.5	1440	0.80	0.26	0.75	0.25	7.16		SUL-25	320	3146
EG33_L274	215.5	1560	0.98	0.08	0.99	0.04	10.38		SUL-26	328	3264
EG33_L283	224.5	1678	1.00	0.00	0.99	0.04	10.61		SUL-27	336	3390
EG33_L292	233.5	1790	1.00	0.00	1.00	0.00	12.2		SUL-28	344	3530
EG33_L301	242.5	1905	1.00	0.00	1.00	0.00	14.15		SUL-29	352	3669
EG33_L310	251.5	2037	0.98	0.08	0.99	0.04	9.23		SUL-30	360	3811
EG33_L319	260.5	2174	0.76	0.30	0.59	0.28	13.85		SUL-31	368	3950
EG33_L328	269.5	2317	1.00	0.00	1.00	0.00	8.08		SUL-32	376	4075
EG33_L337	278.5	2451	1.00	0.00	0.94	0.16	8.46		SUL-33	384	4189
EG33_L346	287.5	2602	1.00	0.00	1.00	0.00	13.12		SUL-34	400	4428
EG33_L355	296.5	2751	1.00	0.00	0.98	0.05	17.58		SUL-35	408	4542
EG33_L364	305.5	2900	0.90	0.13	0.59	0.35	12.19		SUL-36	416	4650
EG33_L373	314.5	3046	0.00	0.00	0.00	0.00	7.37		SUL-37	424	4728
EG33_L382	323.5	3204	0.95	0.16	1.00	0.00	4.68		SUL-38	432	4883
EG33_L391	332.5	3330	1.00	0.00	1.00	0.00	6.35		SUL-39	440	5165
EG33_L399	340.5	3464	0.66	0.39	0.26	0.31	11.88		SUL-40	448	5464
EG33_L409	359.5	3802	0.95	0.16	1.00	0.00	15.24		SUL-41	456	5708
EG33_L418	365.5	3905	1.00	0.00	0.96	0.06	8.72		SUL-42	460	5818
EG33_L427	374.5	4054	1.00	0.00	1.00	0.00	9.96		SUL-43	464	5935
EG33_L436	383.5	4182	0.80	0.24	0.31	0.31	8.41		SUL-44	468	6045
EG33_L445	392.5	4314	0.99	0.04	0.95	0.12	12.27		SUL-45	472	6157
EG33_L454	401.5	4448	1.00	0.00	1.00	0.00	9.75		SUL-46	480	6421
EG33_L463	419.5	4684	1.00	0.00	1.00	0.00	9.73		SUL-47	485	6836
EG33_L472	428.5	4796	0.96	0.12	0.99	0.04	11.98		SUL-48	488	7007
EG33_L481	437.5	5070	1.00	0.00	1.00	0.00	10.13		SUL-49	493	7294
EG33_L490	446.5	5409	1.00	0.00	1.00	0.00	12.14		SUL-50	496	7459
EG33_L499	455.5	5694	1.00	0.00	1.00	0.00	12.91		SUL-51	500	7656
EG33_L508	462.5	5891	1.00	0.00	0.95	0.09	11.09		SUL-52	504	7822
EG33_L517	471.5	6142	1.00	0.00	1.00	0.00	10.07		SUL-53	508	8001
EG33_L526	480.5	6463	1.00	0.00	0.99	0.04	8.73		SUL-54	512	8273
EG33_L535	486.5	6921	0.73	0.28	0.40	0.31	15.57		SUL-55	520	8982
EG33_L544	494.5	7381	1.00	0.00	1.00	0.00	15.56		SUL-56	521	9045
EG33_L553	504.5	7843	0.78	0.29	0.73	0.18	14.95		SUL-57	525.5	9310
EG33_L562	513.5	8408	0.66	0.32	0.31	0.31	27.32		SUL-58	528	9394
EG33_L571	522.5	9138	0.90	0.20	0.61	0.39	13.17		SUL-59	532	9531
EG33_L580	531.5	9514	0.49	0.31	0.49	0.29	8.39		SUL-60	536	9681
EG33_L589	540.5	9873	0.99	0.04	0.99	0.04	10.64		SUL-61	547	10133
EG33_L598	554.5	10399	1.00	0.00	1.00	0.00	6.84		SUL-62	552	10340
EG33_L606	553.5	10439	0.73	0.20	0.41	0.20	7.04		SUL-63	560	10614
EG33_L616	563.5	10715	1.00	0.00	0.99	0.04	4.56		SUL-64	568	10844
EG33_L625	572.5	10960	1.00	0.00	1.00	0.00	4.3		SUL-65	569	10872
EG33_L634	581.5	11174	1.00	0.00	1.00	0.00	6.65		SUL-66	576	11043
EG33_L643	590.5	11384	0.80	0.29	0.45	0.33	4.5		SUL-67	584	11232
EG33_L652	599.5	11597	0.96	0.08	0.95	0.09	6.01		SUL-68	592	11419
EG33_L661	608.5	11806	0.99	0.04	0.98	0.08	4.72		SUL-69	599	11585
EG33_L670	617.5	11994	0.98	0.05	0.93	0.13	7.31		SUL-70	600	11609
EG33_L679	626.5	12178	0.95	0.09	0.49	0.32	2.99		SUL-71	608	11795
EG33_L688	635.5	12359	0.85	0.20	0.56	0.33	4.58		SUL-72	616	11963
EG33_L697	644.5	12398	0.90	0.16	0.75	0.30	2.92		SUL-73	624	12128
EG33_L707	637.5	12537	0.55	0.26	0.33	0.13	2.68		SUL-74	632	12288
EG33_L715	645.5	12557	0.20	0.13	0.00	0.00	2.32		SUL-75	639	12428
EG33_L724	654.5	12738	0.36	0.24	0.23	0.17	2.99
EG33_L730	660.5	12859	0.48	0.29	0.36	0.26	3.01
EG33_L742	672.5	13106	0.18	0.16	0.06	0.07	4.09
EG33_L751	681.5	13291	0.25	0.14	0.05	0.06	3.9
EG33_L760	690.5	13475	0.20	0.06	0.06	0.11	3.95
EG33_L769	699.5	13655	0.03	0.05	0.00	0.00	3.41

## Sheet: S4
		id	sequence	EG33_C001_rpt	EG33_C002_rpt	EG33_C003_rpt	EG33_C004_rpt	EG33_C005_rpt	EG33_C005_rpt_1	EG33_C006_rpt	EG33_C006_rpt_1	EG33_C006b_rpt	EG33_C006c_rpt	EG33_C007_rpt	EG33_C007a_rpt	EG33_C008_rpt	EG33_C008b_rpt	EG33_C008c_rpt	EG33_C009_rpt	EG33_L040_rpt	EG33_L049_rpt	EG33_L058_rpt	EG33_L067_rpt	EG33_L076_rpt	EG33_L085_rpt	EG33_L094_rpt	EG33_L103_rpt	EG33_L112_rpt	EG33_L121_rpt	EG33_L130_rpt	EG33_L139_rpt	EG33_L148_rpt	EG33_L157_rpt	EG33_L166_rpt	EG33_L175_rpt	EG33_L184_rpt	EG33_L193_rpt	EG33_L211_rpt	EG33_L220_rpt	EG33_L229_rpt	EG33_L238_rpt	EG33_L247_rpt	EG33_L256_rpt	EG33_L265_rpt	EG33_L274_rpt	EG33_L283_rpt	EG33_L292_rpt	EG33_L301_rpt	EG33_L310_rpt
		Type		avgpread	avgpread	avgpread	avgpread	avgpread	avgpread	avgpread	avgpread	avgpread	avgpread	avgpread	avgpread	avgpread	avgpread	avgpread	avgpread	avgpread	avgpread	avgpread	avgpread	avgpread	avgpread	avgpread	avgpread	avgpread	avgpread	avgpread	avgpread	avgpread	avgpread	avgpread	avgpread	avgpread	avgpread	avgpread	avgpread	avgpread	avgpread	avgpread	avgpread	avgpread	avgpread	avgpread	avgpread	avgpread	avgpread
		Depth																		2021-05-13	2021-05-22	2021-05-31	40.5	49.5	58.5	67.5	80.5	89.5	98.5	107.5	116.5	125.5	134.5	143.5	152.5	161.5	170.5	160.5	169.5	178.5	187.5	188.5	197.5	206.5	215.5	224.5	233.5	242.5	251.5
		Age																		11	66	120	177	231	288	346	433	492	551	611	677	740	806	870	936	1004	1013	1081	1089	1159	1237	1245	1328	1440	1560	1678	1790	1905	2037
tag:102	Homo sapiens	Matches a human NUMT	ttaattcattaacgcaaacaacacttaacaagtccacaggccctaaactatcaaacctgcgtgaaaaatttc	0	0	0	47884	0	0	0	0	0	0	0	0	0	0	0	0	0	0	0	0	0	0	0	0	0	0	0	0	0	0	0	0	0	0	0	0	0	0	0	0	187159	0	0	0	0	0
tag:1025	Ovis aries	Also match to O. ammon -- the argali, found in the Altai and further east	ttaactaagtaactcaaggaaaataaatttaaccaccaagggataacaacactccttatgagttaacagtttc	0	0	0	0	0	0	0	0	0	0	0	0	0	0	0	0	0	0	0	0	0	0	0	0	0	0	0	0	0	0	9868	0	0	22764	0	0	0	0	0	0	0	0	0	0	0	0
tag:1028	Capra hircus	Also match to C. aegagrus -- the wild ancestor of domestic goat from the near East	ttaactaactagtccaaaagaaataaatttaaccaccaagggataacaacatcctttatggactagcagtttt	0	0	0	0	0	0	0	0	0	0	0	0	0	0	0	0	18536	45111	0	0	27	0	135695	0	0	0	4638	8471	5289	0	93608	90662	98147	93535	51359	43328	137529	145252	93339	78581	0	0	0	0	57354	0
tag:105	Homo sapiens	Matches a human NUMT	ttaatttatgaatgcaaacaagaccaaataggcccgcaggccctaaactaccagacctgcgttaaacatttc	0	0	0	10995	0	0	0	9408	0	0	0	0	0	0	0	0	0	0	0	0	0	7202	0	0	0	0	0	0	0	0	0	0	0	0	0	0	0	0	0	0	157857	0	0	0	0	0
tag:1141	Sus scrofa	NOTE: could be domestic pig or wild boar. Both are expected.	ttaattaactattccaaaagttaaacaactcaaccacaaagggataaaacataacttaacatggactagcaatttc	0	0	0	0	0	0	0	0	0	0	0	0	0	0	0	0	0	0	0	0	0	0	0	0	0	0	5038	4385	0	23856	4322	2839	2045	0	5653	439	11297	2749	3183	0	0	0	0	0	0	0
tag:1187	Bos taurus	Domestic cow. Not aurochs (which would be Haplogroup P)	ttaactaaccaacccaaagagaatagatttaaccactaaggaataacaacaatctccatgagttggtagtttc	0	0	0	0	0	0	0	0	0	0	0	0	0	0	0	0	0	36719	55556	0	0	0	0	33365	11585	35921	10519	0	649	0	5177	5862	32328	0	0	52878	0	0	0	0	0	0	0	0	0	0
tag:12385	Dendrodrilus rubidus	Worm	ttatttaataaaagtatagcccaactttttataattc	0	0	0	0	0	0	0	0	0	0	0	0	0	0	0	0	0	0	0	0	0	0	0	7049	0	0	0	0	0	0	0	0	0	0	0	0	0	2952	2.70E-04	0	0	0	0	0	0	0
tag:16	Homo sapiens	Matches a human NUMT	ttaattcattaatgcaaataaaaactcaaacaagcctagaggccctagcctactatccctgcattaaaaaatgt	0	0	0	65129	0.25	0	0	43778	0	0	0	0	0	0	0	0	8364	0	0	0	0	0	0	0	0	0	0	0	0	0	0	0	0	0	0	0	0	0	0	0	121132	0	0	0	0	0
tag:16409	Rupicapra rupicapra	Can differentiate from pyrennean chamois (R. pyrenaica)	ttaactaactagcccaaagaaaacaaactcaaccaccaagggataacaacactcttcatggactagcagtttt	0	0	0	0	0	0	0	0	0	0	0	0	0	0	0	0	0	8439	0	0	0	0	0	0	5975	0	0	0	0	0	0	0	1996	0	0	0	0	0	4004	0	0	0	22826	0	0	0
tag:16628	Octolasion	Worm	tcattttaatagaaaaataatatcctaataaaattc	0	0	0	0	0	0	0	0	0	0	0	0	0	0	0	0	0	2635	0	0	1106	0	0	0	0	0	1753	3.24E-04	0	0	1622	8.31E-04	0	0	0	0	2715	0	0	0	0	0	0	0	0	0
tag:2	Homo sapiens		ttaatttattaatgcaaacagtacctaacaaacccacaggtcctaaactaccaaacctgcattaaaaatttc	0	0.25	872392	713122	0	2763	0	600351	0.5	0	0	0.25	0.25	0	0	0.5	0	0	0	0	2925	0	20548	856	0	4072	0	5.23E-05	7.27E-04	4082	0	0	7638	0	0	0	0	0	0	0	533852	0	0	0	1715	0
tag:2037	Equus caballus	Only caballine horse know from the region. Can differentiate from donkey (E. asinus)	ttaattaactgattcacaaaaaacaacacacaaacctaaccttcagggacaacaaaacttttgattgaatcagcaatttc	0	0	0	0	0	0	0	0	0	0	0	0	0	0	0	0	0	0	0	0	0	32746	0	0	0	69117	18042	5539	15613	0	0	0	0	0	151	0	0	0	0	0	0	0	0	0	0	0
tag:2097	Tubifex tubifex	Worm	ttacctaaaaattgcaatattggcaaataagggttc	0	0	0	0	0	0	0	0	0	0	0	0	0	0	0	0	0	37138	2037	0	1798	0	6239	15251	9556	26246	0	1625	238	12384	374	0	1851	3931	7587	1366	0	1683	5497	0	0	18376	5588	33075	1842	0
tag:21822	Homo sapiens		ttaatttattaatgcaagcaatacctaacaaacccacaggtcctaaactaccaaacctgcattaaaaatttc	0	0	0	0	0	38968	0	0	0	0	0	0	0	0	0	0	0	0	0	0	0	0	0	0	0	0	0	0	0	0	0	0	0	0	0	0	0	0	0	0	0	0	0	0	0	0
tag:2289	Rana temporaria		ttaaactcaccacgcacctctgtgtcctcatacccttaaacacaagagatctacgtgctagtttta	0	0	0	0	0	0	0	0	0	0	0	0	0	0	0	0	0	0	0	0	0	0	0	0	4009	0	0	0	0	0	7961	8533	24183	4814	310215	22924	13982	61812	41464	39384	0	553745	643222	91187	315601	0
tag:2295	Capra hircus		ttaactaactaatccaaaagaaataaatttaaccaccaagggataacaacatcctttatggactagcagtttt	0	0	0	0	0	0	0	0	0	0	0	0	0	0	0	0	0	0	0	0	0	0	0	0	0	0	8.06E-04	0	0	0	2011	0	1524	0	0	1105	818	0	3183	9.00E-04	0	0	0	0	0	0
tag:2388	Capra hircus		ttaactaactagtccaaaagaaataaatttaaccaccaagggataacaacatcctttatgaactagcagtttt	0	0	0	0	0	0	0	0	0	0	0	0	0	0	0	0	0	0	0	0	0	0	0	0	0	0	0	0	5.33E-04	0	0	0	0	0	13091	0	0	10124	2304	0	0	0	0	0	0	0
tag:29166	Tubifex tubifex	Worm	ttacctaaaatctacataaatagtagctagcggttc	0	0	0	0	0	0	0	0	0	0	0	0	0	0	0	0	0	2808	0	0	0	0	0	0	3.14E-04	0	0	0	0	0	0	0	2638	4.30E-04	0	0	0	0	0	0	0	0	0	0	0	0
tag:3	Ovis aries	Also match to O. orientalis -- the wild ancestor of domestic sheep from the near East	ttaactaagtaactcaaggaaaataaattcaaccaccaagggataacaacactccttatgagttaacagtttc	0	0	0	0	0	0	0	0	0	0	0	0	0	0	0	0	10456	1566	306551	108837	135128	236403	787607	645308	573869	50329	615634	639283	427703	369173	416844	737188	648648	407112	446713	516222	805692	752924	827292	812375	0	427879	104786	213434	543259	0
tag:30337	Cervus elaphus	Also match to North American wapiti (C. canadensis)	ttaactacttagcccaaagaaataaatttcattactaaggaaacaacaacactctttatgggctaacagcttt	0	0	0	0	0	0	0	0	0	0	0	0	0	0	0	0	0	0	0	0	0	0	0	0	0	0	0	0	0	0	0	0	0	0	0	0	0	0	0	0	0	0	0	0	0	0
tag:3106	Ovis canadensis canadensis	89-91% BLAST hit to multiple bovid species. Interpreted as a NUMT in the O. canadensis genome.	ttaactaattagtccaaagaaaataaactcaaccaccagggggtaataacactctttatggactaacagtttt	0	0	0	0	0	0	0	0	0	0	0	0	0	0	0	0	0	0	0	0	0	0	0	0	0	1867	1111	0	343	0	0	3869	2654	0	0	352	14373	1817	4943	0	0	0	0	0	1071	0
tag:3107	Capra hircus	Also match to C. aegagrus -- the wild ancestor of domestic goat from the near East. And C. caucasica -- endemic to the caucases.	ttaactaactagtccaaaagaaataaatttaaccactaagggataacaacatcctttatggactagcagtttt	0	0	0	0	0	0	0	0	0	0	0	0	0	0	0	0	0	0	0	0	0	0	0	0	0	0	0	0	0	0	0	5982	968	82	0	6907	6233	399	11599	3228	0	0	0	0	0	0
tag:31571	Homo sapiens	Matches human autosome (chr10)	tgaattcattaatgcaaatagattcaaacaagccaacaggccccaatgtatcatccctgcattaaaaatttt	0	0	0	0	0	0	0	0	0	0	0	0	0	0	0	0	0	0	0	0	0	0	0	0	0	0	0	0	0	0	0	0	0	0	0	0	0	0	0	0	0	0	0	0	0	0
tag:37566	Homo sapiens	Matches a human NUMT/pseudogene	ttaatttatgaatgcaaacaagaccaaataggcccccaggccctaaactaccagacctgcgttaaacatttc	0	0	0	0	0	0	0	8028	0	0	0	0	0	0	0	0	0	0	0	0	0	0	0	0	0	0	0	0	0	0	0	0	0	0	0	0	0	0	0	0	0	0	0	0	0	0
tag:37585	Homo sapiens	Matches a human NUMT	ttaatttattaatgcaaacaaagctcaaataagcccacaggccttaaactactgtccctgcattaaaaatttt	0	0	0	0	0	0	0	1129	0	0	0	0	0	0	0	0	0	0	0	0	0	0	0	0	0	0	0	0	0	0	0	0	0	0	0	0	0	0	0	0	0	0	0	0	0	0
tag:4	Bos taurus	Domestic cow. Not aurochs (which would be Haplogroup P)	ttaactaaccaacccaaagagaatagatttaaccattaaggaataacaacaatctccatgagttggtagtttc	0	0	0	0	0	0	0	0	0	0	0	0	0	0	0	0	962643	862709	617523	641163	856343	473649	49911	290468	144691	35211	338362	339023	537495	590505	458212	144234	166668	459213	150282	347359	0	142	2923	3643	0	0	72476	662305	54969	0
tag:40639	Homininae	Matches human X chromosome	tcaatttattaggacaaatgaacttagaaaaaataaaacttacaagtcttaatattttatctaatgaaagaaatatttt	0	0	0	4.01E+09	0	0	0	12042	0	0	0	0	0	0	0	0	0	0	0	0	0	0	0	0	0	0	0	0	0	0	0	0	0	0	0	0	0	0	0	0	0	0	0	0	0	0
tag:42131	Capra ibex		ttaactaactagtccaaaagaaataaatccaaccactaagggataacaacatcctttatggactagcagtttt	0	0	0	0	0	0	0	0	0	0	0	0	0	0	0	0	0	0	0	0	0	0	0	0	0	0	1631	0	0	0	0	0	0	0	0	0	0	0	0	0	0	0	0	0	0	0
tag:42134	Lumbricus friendi	Worm	taattaaattaaatactaaaaatttactaaaattc	0	0	0	0	0	0	0	0	0	0	0	0	0	0	0	0	0	2875	0	0	0	0	0	0	0	7378	2467	1297	3.39E-04	0	0	0	0	0	0	0	0	0	0	0	0	0	0	0	0	0
tag:43893	Homo sapiens	Matches human autosome (chr11)	ttaattcattaaggcaaatagaaactcgccctaacccattaccattgcattaaaaatttt	0	0	0	3.85E-04	0	0	0	2509	0	0	0	0	0	0	0	0	0	0	0	0	0	0	0	0	0	0	0	0	0	0	0	0	0	0	0	0	0	0	0	0	0	0	0	0	0	0
tag:50937	Homo sapiens	Matches a human NUMT/pseudogene	tcaatttaccaatgcaaacaacacccaataagcccacaggctctaacctaccaaacctgcattaaaaatttc	0	0	0	3039	0	0	0	0	0	0	0	0	0	0	0	0	0	0	0	0	0	0	0	0	0	0	0	0	0	0	0	0	0	0	0	0	0	0	0	0	0	0	0	0	0	0
tag:57641	Homo sapiens	Matches a human NUMT/pseudogene	ttaactcattaatgcaaataaaacttcaaaaagcctacaggccttagcatactgtctgtgcattaaaatttt	0	0	120904	159406	0	203326	0	72755	0	0	0	0	0	0	0	0	0	0	0	0	0	0	0	0	0	0	0	0	0	0	0	0	0	0	0	0	0	0	0	0	0	0	0	0	0	0
tag:5848	Cervus elaphus		ttaactacttagcccaaagaaataaatttcattactaaggaaacaacaacactctttatgggttaacagcttt	0	0	0	0	0	0	0	0	0	0	0	0	0	0	0	0	0	0	0	0	0	0	0	0	0	0	0	0	0	0	0	0	0	0	0	0	0	2498	0	0	0	0	100811	0	0	0.25
tag:58699	Homo sapiens	Matches a human NUMT/pseudogene	ttaattcattaatgcaaataaaaacccaaacaagtctagaggccctggcctactatccctgcattaaaaatttt	0	0	3289	0	0	4943	0	0	0	0	0	0	0.25	0	0	0	0	0	0	0	0	0	0	0	0	0	0	0	0	0	0	0	0	0	0	0	0	0	0	0	0	0	0	0	0	0
tag:886	Homininae	Matches human autosome (chr7)	ttaatttattaatgcaaacaaagctcagataagcccacaggccttaaactactgtccctgcattaaatatttt	0	0	3415	0	0	0	0	0	0	0	0	0	0	0	0	0	0	0	0	0	0	0	0	0	0	0	0	0	0	0	0	0	0	0	0	0	0	0	0	0	0	0	0	0	0	0
tag:92	Ovis aries	Also match to O. orientalis -- the wild ancestor of domestic sheep from the near East	ttaactaagtaactcaaggaaaacaaattcaaccaccaagggataacaacactccttatgagttaacagtttc	0	0	0	0	0	0	0	0	0	0	0	0	0	0	0	0	0	0	0	0	0	0	0	0	0	0	0	0	0	0	0	0	0	0	0	0	0	0	0	61889	0	0	0	0	14549	0
[truncated: 530 more columns]

## Sheet: S5
Plant sedaDNA					Mammal sedaDNA
		Sulseewlii	Sulseewlii				Sulseewlii	Sulseewlii
Tag_number	Tag	ECOG-1-7	ECOG-1-8		Tag_number	Tag	mam_EG33	EG33 16s
1	AACAAGCC	EG33_C008_rpt1	EG33_L382_rpt1		1	AACAAGCC	EG33_L382_rpt1	EG33_C008(+)_rpt1
2	AGGAATGAG	EG33_L715_rpt1	EG33_L220_rpt1		2	AGGAATGAG	EG33_L220_rpt1	EG33_L715_rpt1
3	AATTGCCG	EG33_C005_rpt1	EG33_L094_rpt1		3	AATTGCCG	EG33_L094_rpt1	EG33_C005_rpt1
4	CCGACCATA	EG33_C001_rpt1	EG33_L283_rpt1		4	CCGACCATA	EG33_L283_rpt1	EG33_C001_rpt1
5	ATGCTGAC	EG33_C008_rpt2	EG33_L382_rpt2		5	ATGCTGAC	EG33_L382_rpt2	EG33_C008(+)_rpt2
6	GTGAGACAG	EG33_L715_rpt2	EG33_L220_rpt2		6	GTGAGACAG	EG33_L220_rpt2	EG33_L715_rpt2
7	GAGCTTAC	EG33_C005_rpt2	EG33_L094_rpt2		7	GAGCTTAC	EG33_L094_rpt2	EG33_C005_rpt2
8	TTTACCAGG	EG33_C001_rpt2	EG33_L283_rpt2		8	TTTACCAGG	EG33_L283_rpt2	EG33_C001_rpt2
9	TGAGAGCT	EG33_L769_rpt1	EG33_L148_rpt1		9	TGAGAGCT	EG33_L148_rpt1	EG33_L769_rpt1
10	ACTGACCTT	EG33_L697_rpt1	EG33_L328_rpt1		10	ACTGACCTT	EG33_L328_rpt1	EG33_L697_rpt1
11	ATGCTTGG	EG33_C004_rpt1	EG33_L399_rpt1		11	ATGCTTGG	EG33_L399_rpt1	EG33_C004_rpt1
12	CAACACCGT	EG33_L463_rpt1	EG33_C009_rpt1		12	CAACACCGT	EG33_C009_rpt1	EG33_L463_rpt1
13	TTACCGCT	EG33_L769_rpt2	EG33_L148_rpt2		13	TTACCGCT	EG33_L148_rpt2	EG33_L769_rpt2
14	GCCAGTATG	EG33_L697_rpt2	EG33_L328_rpt2		14	GCCAGTATG	EG33_L328_rpt2	EG33_L697_rpt2
15	TGAGATGC	EG33_C004_rpt2	EG33_L399_rpt2		15	TGAGATGC	EG33_L399_rpt2	EG33_C004_rpt2
16	TGTGCAACT	EG33_L463_rpt2	EG33_C009_rpt2		16	TGTGCAACT	EG33_C009_rpt2	EG33_L463_rpt2
17	ACAACCGA	EG33_L643_rpt1	EG33_L076_rpt1		17	ACAACCGA	EG33_L076_rpt1	EG33_L643_rpt1
18	ATGAGCCTA	EG33_L589_rpt1	EG33_C008_rpt1		18	ATGAGCCTA	EG33_C008 b_rpt1	EG33_L589_rpt1
19	ATGGAGGT	EG33_L707_rpt1	EG33_L301_rpt1		19	ATGGAGGT	EG33_L301_rpt1	EG33_L707_rpt1
20	CTCATACGC	EG33_L472_rpt1	EG33_L391_rpt1		20	CTCATACGC	EG33_L391_rpt1	EG33_L472_rpt1
21	CTGAGTCT	EG33_L643_rpt2	EG33_L076_rpt2		21	CTGAGTCT	EG33_L076_rpt2	EG33_L643_rpt2
22	GGAGGTGAA	EG33_L589_rpt2	EG33_C008_rpt2		22	GGAGGTGAA	EG33_C008 b_rpt2	EG33_L589_rpt2
23	GGCATGTA	EG33_L707_rpt2	EG33_L301_rpt2		23	GGCATGTA	EG33_L301_rpt2	EG33_L707_rpt2
24	TGTGCCATA	EG33_L472_rpt2	EG33_L391_rpt2		24	TGTGCCATA	EG33_L391_rpt2	EG33_L472_rpt2
25	TTACGCCA	EG33_L634_rpt1	EG33_L274_rpt1		25	TTACGCCA	EG33_L274_rpt1	EG33_L634_rpt1
26	ATCATAGCG	EG33_L409_rpt1	EG33_L310_rpt1		26	ATCATAGCG	EG33_L310_rpt1	EG33_L409_rpt1
27	TGAGGACA	EG33_L661_rpt1	EG33_L364_rpt1		27	TGAGGACA	EG33_L364_rpt1	EG33_L661_rpt1
28	CAACAGGAG	EG33_L427_rpt1	EG33_L238_rpt1		28	CAACAGGAG	EG33_L238_rpt1	EG33_L427_rpt1
29	GAGTAACC	EG33_L634_rpt2	EG33_L274_rpt2		29	GAGTAACC	EG33_L274_rpt2	EG33_L634_rpt2
30	GCAGCTCAT	EG33_L409_rpt2	EG33_L310_rpt2		30	GCAGCTCAT	EG33_L310_rpt2	EG33_L409_rpt2
31	TGCTCCAA	EG33_L661_rpt2	EG33_L364_rpt2		31	TGCTCCAA	EG33_L364_rpt2	EG33_L661_rpt2
32	TTCAGTCGA	EG33_L427_rpt2	EG33_L238_rpt2		32	TTCAGTCGA	EG33_L238_rpt2	EG33_L427_rpt2
33	GGAGAAGA	EG33_L580_rpt1	EG33_L193_rpt1		33	GGAGAAGA	EG33_L193_rpt1	EG33_L580_rpt1
34	AGTGCTCAA	EG33_L730_rpt1	EG33_L049_rpt1		34	AGTGCTCAA	EG33_L049_rpt1	EG33_L730_rpt1
35	ACAAGACC	EG33_L724_rpt1	EG33_L067_rpt1		35	ACAAGACC	EG33_L067_rpt1	EG33_L724_rpt1
36	CCAGGAACA	EG33_L436_rpt1	EG33_L184_rpt1		36	CCAGGAACA	EG33_L184_rpt1	EG33_L436_rpt1
37	GTGATCTC	EG33_L580_rpt2	EG33_L193_rpt2		37	GTGATCTC	EG33_L193_rpt2	EG33_L580_rpt2
38	GACTTGGCT	EG33_L730_rpt2	EG33_L049_rpt2		38	GACTTGGCT	EG33_L049_rpt2	EG33_L730_rpt2
39	CGATACAC	EG33_L724_rpt2	EG33_L067_rpt2		39	CGATACAC	EG33_L067_rpt2	EG33_L724_rpt2
40	TTCATCCTG	EG33_L436_rpt2	EG33_L184_rpt2		40	TTCATCCTG	EG33_L184_rpt2	EG33_L436_rpt2
41	CAGGCTAA	EG33_C002_rpt1	EG33_L058_rpt1		41	CAGGCTAA	EG33_L058_rpt1	EG33_C002_rpt1
42	ATCATCGGT	EG33_L544_rpt1	EG33_L211_rpt1		42	ATCATCGGT	EG33_L211_rpt1	EG33_L544_rpt1
43	AGTTCCAC	EG33_L481_rpt1	EG33_L319_rpt1		43	AGTTCCAC	EG33_L319_rpt1	EG33_L481_rpt1
44	CAACCAACG	EG33_L508_rpt1	EG33_L103_rpt1		44	CAACCAACG	EG33_L103_rpt1	EG33_L508_rpt1
45	CTGCGAAT	EG33_C002_rpt2	EG33_L058_rpt2		45	CTGCGAAT	EG33_L058_rpt2	EG33_C002_rpt2
46	GGTGGTTAG	EG33_L544_rpt2	EG33_L211_rpt2		46	GGTGGTTAG	EG33_L211_rpt2	EG33_L544_rpt2
47	AGAACGTG	EG33_L481_rpt2	EG33_L319_rpt2		47	AGAACGTG	EG33_L319_rpt2	EG33_L481_rpt2
48	TTCATGCCT	EG33_L508_rpt2	EG33_L103_rpt2		48	TTCATGCCT	EG33_L103_rpt2	EG33_L508_rpt2
49	GGATAGCA	EG33_L670_rpt1	EG33_L085_rpt1		49	GGATAGCA	EG33_L085_rpt1	EG33_L670_rpt1
50	ACAGTAGAC	EG33_L742_rpt1	EG33_L175_rpt1		50	ACAGTAGAC	EG33_L175_rpt1	EG33_L742_rpt1
51	TAGCCACT	EG33_L526_rpt1	EG33_L292_rpt1		51	TAGCCACT	EG33_L292_rpt1	EG33_L526_rpt1
52	CGAGGACTA	EG33_L562_rpt1	EG33_L265_rpt1		52	CGAGGACTA	EG33_L265_rpt1	EG33_L562_rpt1
53	AGAAGAGG	EG33_L670_rpt2	EG33_L085_rpt2		53	AGAAGAGG	EG33_L085_rpt2	EG33_L670_rpt2
54	GCGATGAGT	EG33_L742_rpt2	EG33_L175_rpt2		54	GCGATGAGT	EG33_L175_rpt2	EG33_L742_rpt2
55	GTGTAGTC	EG33_L526_rpt2	EG33_L292_rpt2		55	GTGTAGTC	EG33_L292_rpt2	EG33_L526_rpt2
56	TGAGTTCCT	EG33_L562_rpt2	EG33_L265_rpt2		56	TGAGTTCCT	EG33_L265_rpt2	EG33_L562_rpt2
57	ACACACAG	EG33_L490_rpt1	EG33_L229_rpt1		57	ACACACAG	EG33_L229_rpt1	EG33_L490_rpt1
58	AAACCTAGC	EG33_L751_rpt1	EG33_L130_rpt1		58	AAACCTAGC	EG33_L130_rpt1	EG33_L751_rpt1
59	ACACAGGT	EG33_L445_rpt1	EG33_L247_rpt1		59	ACACAGGT	EG33_L247_rpt1	EG33_L445_rpt1
60	CTAGAGCTG	EG33_L571_rpt1	EG33_L112_rpt1		60	CTAGAGCTG	EG33_L112_rpt1	EG33_L571_rpt1
61	AACCTCAG	EG33_L490_rpt2	EG33_L229_rpt2		61	AACCTCAG	EG33_L229_rpt2	EG33_L490_rpt2
62	GGGATGATC	EG33_L751_rpt2	EG33_L130_rpt2		62	GGGATGATC	EG33_L130_rpt2	EG33_L751_rpt2
63	TATCTGGC	EG33_L445_rpt2	EG33_L247_rpt2		63	TATCTGGC	EG33_L247_rpt2	EG33_L445_rpt2
64	TCTGGTTGA	EG33_L571_rpt2	EG33_L112_rpt2		64	TCTGGTTGA	EG33_L112_rpt2	EG33_L571_rpt2
65	TCCAACAC	EG33_L688_rpt1	EG33_L040_rpt1		65	TCCAACAC	EG33_L040_rpt1	EG33_L688_rpt1
66	AGTGTGAAG	EG33_L553_rpt1	EG33_L139_rpt1		66	AGTGTGAAG	EG33_L139_rpt1	EG33_L553_rpt1
67	AACCTGCT	EG33_L760_rpt1	EG33_C006_rpt1		67	AACCTGCT	EG33_C006 b_rpt1	EG33_L760_rpt1
68	CGGATGTCT	EG33_L679_rpt1	EG33_L355_rpt1		68	CGGATGTCT	EG33_L355_rpt1	EG33_L679_rpt1
69	TCCAAGCA	EG33_L688_rpt2	EG33_L040_rpt2		69	TCCAAGCA	EG33_L040_rpt2	EG33_L688_rpt2
70	GAGAATGCC	EG33_L553_rpt2	EG33_L139_rpt2		70	GAGAATGCC	EG33_L139_rpt2	EG33_L553_rpt2
71	GTGTGTGT	EG33_L760_rpt2	EG33_C006_rpt2		71	GTGTGTGT	EG33_C006 b_rpt2	EG33_L760_rpt2
72	TCACGGATA	EG33_L679_rpt2	EG33_L355_rpt2		72	TCACGGATA	EG33_L355_rpt2	EG33_L679_rpt2
73	CAACCTCA	EG33_L418_rpt1	EG33_L121_rpt1		73	CAACCTCA	EG33_L121_rpt1	EG33_L418_rpt1
74	AGGATTCGA	EG33_L598_rpt1	EG33_L337_rpt1		74	AGGATTCGA	EG33_L337_rpt1	EG33_L598_rpt1
75	TTAGGCAC	EG33_L606_rpt1	EG33_C007_rpt1		75	TTAGGCAC	EG33_C007_rpt1	EG33_L606_rpt1
76	CCGCATAGA	EG33_L499_rpt1	EG33_C005_rpt1		76	CCGCATAGA	EG33_C005_rpt1	EG33_L499_rpt1
77	CAGTTCTC	EG33_L418_rpt2	EG33_L121_rpt2		77	CAGTTCTC	EG33_L121_rpt2	EG33_L418_rpt2
78	GAACGAGTG	EG33_L598_rpt2	EG33_L337_rpt2		78	GAACGAGTG	EG33_L337_rpt2	EG33_L598_rpt2
79	CTGTCAAC	EG33_L606_rpt2	EG33_C007_rpt2		79	CTGTCAAC	EG33_C007_rpt2	EG33_L606_rpt2
80	TTCCACCTA	EG33_L499_rpt2	EG33_C005_rpt2		80	TTCCACCTA	EG33_C005_rpt2	EG33_L499_rpt2
81	CGCATCTT	EG33_L616_rpt1	EG33_L166_rpt1		81	CGCATCTT	EG33_L166_rpt1	EG33_L616_rpt1
82	AGATACGCT	EG33_L517_rpt1	EG33_L373_rpt1		82	AGATACGCT	EG33_C006 c_rpt1	EG33_L517_rpt1
83	GTGTTGGA	EG33_L625_rpt1	EG33_L256_rpt1		83	GTGTTGGA	EG33_L256_rpt1	EG33_L625_rpt1
84	CACACTAGG	EG33_L652_rpt1	EG33_C006_rpt1		84	CACACTAGG	EG33_C006_rpt1	EG33_L652_rpt1
85	CGCCAATT	EG33_L616_rpt2	EG33_L166_rpt2		85	CGCCAATT	EG33_L166_rpt2	EG33_L616_rpt2
86	GTAGCAAGG	EG33_L517_rpt2	EG33_L373_rpt2		86	GTAGCAAGG	EG33_C006 c_rpt2	EG33_L517_rpt2
87	GTCACAGA	EG33_L625_rpt2	EG33_L256_rpt2		87	GTCACAGA	EG33_L256_rpt2	EG33_L625_rpt2
88	TTCCAGATC	EG33_L652_rpt2	EG33_C006_rpt2		88	TTCCAGATC	EG33_C006_rpt2	EG33_L652_rpt2
89	ACACTCCT	EG33_L535_rpt1	EG33_L157_rpt1		89	ACACTCCT	EG33_L157_rpt1	EG33_L535_rpt1
90	AGTTAACGG	EG33_C003_rpt1	EG33_C008_rpt1		90	AGTTAACGG	EG33_C008(+) c_rpt1	EG33_C003_rpt1
91	AACGCGAT	EG33_L454_rpt1	EG33_L346_rpt1		91	AACGCGAT	EG33_L346_rpt1	EG33_L454_rpt1
92	CCGCGTAAT	EG33_C006_rpt1	EG33_C007_rpt1		92	CCGCGTAAT	EG33_C007_rpt1	EG33_C006_rpt1
93	CCGATACT	EG33_L535_rpt2	EG33_L157_rpt2		93	CCGATACT	EG33_L157_rpt2	EG33_L535_rpt2
94	GAGACATCC	EG33_C003_rpt2	EG33_C008_rpt2		94	GAGACATCC	EG33_C008(+) c_rpt2	EG33_C003_rpt2
95	GATAGAGG	EG33_L454_rpt2	EG33_L346_rpt2		95	GATAGAGG	EG33_L346_rpt2	EG33_L454_rpt2
96	TCTGTTGTG	EG33_C006_rpt2	EG33_C007_rpt2		96	TCTGTTGTG	EG33_C007_rpt2	EG33_C006_rpt2
97	AACGCTTC	EG33_C008_rpt3	EG33_L382_rpt3		97	AACGCTTC	EG33_L382_rpt3	EG33_C008(+)_rpt3
98	AACACTGTC	EG33_L715_rpt3	EG33_L220_rpt3		98	AACACTGTC	EG33_L220_rpt3	EG33_L715_rpt3
99	TCCATACG	EG33_C005_rpt3	EG33_L094_rpt3		99	TCCATACG	EG33_L094_rpt3	EG33_C005_rpt3
100	CAGTGTTCC	EG33_C001_rpt3	EG33_L283_rpt3		100	CAGTGTTCC	EG33_L283_rpt3	EG33_C001_rpt3
101	ACAGAAGC	EG33_C008_rpt4	EG33_L382_rpt4		101	ACAGAAGC	EG33_L382_rpt4	EG33_C008(+)_rpt4
102	GAGACCTGT	EG33_L715_rpt4	EG33_L220_rpt4		102	GAGACCTGT	EG33_L220_rpt4	EG33_L715_rpt4
103	CGCTCTTA	EG33_C005_rpt4	EG33_L094_rpt4		103	CGCTCTTA	EG33_L094_rpt4	EG33_C005_rpt4
104	TAGACGAAC	EG33_C001_rpt4	EG33_L283_rpt4		104	TAGACGAAC	EG33_L283_rpt4	EG33_C001_rpt4
105	TGCAAGAG	EG33_L769_rpt3	EG33_L148_rpt3		105	TGCAAGAG	EG33_L148_rpt3	EG33_L769_rpt3
106	AAAGAGTGC	EG33_L697_rpt3	EG33_L328_rpt3		106	AAAGAGTGC	EG33_L328_rpt3	EG33_L697_rpt3
107	CATACCTC	EG33_C004_rpt3	EG33_L399_rpt3		107	CATACCTC	EG33_L399_rpt3	EG33_C004_rpt3
108	CCTGTTCGT	EG33_L463_rpt3	EG33_C009_rpt3		108	CCTGTTCGT	EG33_C009_rpt3	EG33_L463_rpt3
109	CGCTTATG	EG33_L769_rpt4	EG33_L148_rpt4		109	CGCTTATG	EG33_L148_rpt4	EG33_L769_rpt4
110	GAGACGCTT	EG33_L697_rpt4	EG33_L328_rpt4		110	GAGACGCTT	EG33_L328_rpt4	EG33_L697_rpt4
111	AACGTCGA	EG33_C004_rpt4	EG33_L399_rpt4		111	AACGTCGA	EG33_L399_rpt4	EG33_C004_rpt4
112	TTAGCCTGA	EG33_L463_rpt4	EG33_C009_rpt4		112	TTAGCCTGA	EG33_C009_rpt4	EG33_L463_rpt4
113	AAGGTTCG	EG33_L643_rpt3	EG33_L076_rpt3		113	AAGGTTCG	EG33_L076_rpt3	EG33_L643_rpt3
114	AATGAGGTG	EG33_L589_rpt3	EG33_C008_rpt3		114	AATGAGGTG	EG33_C008 b_rpt3	EG33_L589_rpt3
115	GATATCGC	EG33_L707_rpt3	EG33_L301_rpt3		115	GATATCGC	EG33_L301_rpt3	EG33_L707_rpt3
116	CGTTACTCG	EG33_L472_rpt3	EG33_L391_rpt3		116	CGTTACTCG	EG33_L391_rpt3	EG33_L472_rpt3
117	TCCGAGAT	EG33_L643_rpt4	EG33_L076_rpt4		117	TCCGAGAT	EG33_L076_rpt4	EG33_L643_rpt4
118	GGGCTCTAT	EG33_L589_rpt4	EG33_C008_rpt4		118	GGGCTCTAT	EG33_C008 b_rpt4	EG33_L589_rpt4
119	TAGCGTAG	EG33_L707_rpt4	EG33_L301_rpt4		119	TAGCGTAG	EG33_L301_rpt4	EG33_L707_rpt4
120	TTGCACTAC	EG33_L472_rpt4	EG33_L391_rpt4		120	TTGCACTAC	EG33_L391_rpt4	EG33_L472_rpt4
121	ACAACGCT	EG33_L634_rpt3	EG33_L274_rpt3		121	ACAACGCT	EG33_L274_rpt3	EG33_L634_rpt3
122	ATCCGCTAA	EG33_L409_rpt3	EG33_L310_rpt3		122	ATCCGCTAA	EG33_L310_rpt3	EG33_L409_rpt3
123	ATACAGCG	EG33_L661_rpt3	EG33_L364_rpt3		123	ATACAGCG	EG33_L364_rpt3	EG33_L661_rpt3
124	CAACTACGC	EG33_L427_rpt3	EG33_L238_rpt3		124	CAACTACGC	EG33_L238_rpt3	EG33_L427_rpt3
125	CAACGTAC	EG33_L634_rpt4	EG33_L274_rpt4		125	CAACGTAC	EG33_L274_rpt4	EG33_L634_rpt4
126	GGTTAGGCA	EG33_L409_rpt4	EG33_L310_rpt4		126	GGTTAGGCA	EG33_L310_rpt4	EG33_L409_rpt4
127	CATAGTCG	EG33_L661_rpt4	EG33_L364_rpt4		127	CATAGTCG	EG33_L364_rpt4	EG33_L661_rpt4
128	TGTGCCTAT	EG33_L427_rpt4	EG33_L238_rpt4		128	TGTGCCTAT	EG33_L238_rpt4	EG33_L427_rpt4
129	CGGATTGT	EG33_L580_rpt3	EG33_L193_rpt3		129	CGGATTGT	EG33_L193_rpt3	EG33_L580_rpt3
130	AAGAGAACG	EG33_L730_rpt3	EG33_L049_rpt3		130	AAGAGAACG	EG33_L049_rpt3	EG33_L730_rpt3
131	ATACCACC	EG33_L724_rpt3	EG33_L067_rpt3		131	ATACCACC	EG33_L067_rpt3	EG33_L724_rpt3
132	CAATGCCAG	EG33_L436_rpt3	EG33_L184_rpt3		132	CAATGCCAG	EG33_L184_rpt3	EG33_L436_rpt3
133	AACAGCTC	EG33_L580_rpt4	EG33_L193_rpt4		133	AACAGCTC	EG33_L193_rpt4	EG33_L580_rpt4
134	GCGGTACTA	EG33_L730_rpt4	EG33_L049_rpt4		134	GCGGTACTA	EG33_L049_rpt4	EG33_L730_rpt4
135	ATACCGGA	EG33_L724_rpt4	EG33_L067_rpt4		135	ATACCGGA	EG33_L067_rpt4	EG33_L724_rpt4
136	TGATCATCG	EG33_L436_rpt4	EG33_L184_rpt4		136	TGATCATCG	EG33_L184_rpt4	EG33_L436_rpt4
137	AGAGAGTC	EG33_C002_rpt3	EG33_L058_rpt3		137	AGAGAGTC	EG33_L058_rpt3	EG33_C002_rpt3
138	AAACTCCTG	EG33_L544_rpt3	EG33_L211_rpt3		138	AAACTCCTG	EG33_L211_rpt3	EG33_L544_rpt3
139	CGAACAAC	EG33_L481_rpt3	EG33_L319_rpt3		139	CGAACAAC	EG33_L319_rpt3	EG33_L481_rpt3
140	CCGGTCATT	EG33_L508_rpt3	EG33_L103_rpt3		140	CCGGTCATT	EG33_L103_rpt3	EG33_L508_rpt3
141	ACAGTGAG	EG33_C002_rpt4	EG33_L058_rpt4		141	ACAGTGAG	EG33_L058_rpt4	EG33_C002_rpt4
142	GCGGTTGAA	EG33_L544_rpt4	EG33_L211_rpt4		142	GCGGTTGAA	EG33_L211_rpt4	EG33_L544_rpt4
143	GAGCTAGA	EG33_L481_rpt4	EG33_L319_rpt4		143	GAGCTAGA	EG33_L319_rpt4	EG33_L481_rpt4
144	TTGCCAGTA	EG33_L508_rpt4	EG33_L103_rpt4		144	TTGCCAGTA	EG33_L103_rpt4	EG33_L508_rpt4
145	AGAGCTAC	EG33_L670_rpt3	EG33_L085_rpt3		145	AGAGCTAC	EG33_L085_rpt3	EG33_L670_rpt3
146	AAACTGAGG	EG33_L742_rpt3	EG33_L175_rpt3		146	AAACTGAGG	EG33_L175_rpt3	EG33_L742_rpt3
147	GGTAGTTC	EG33_L526_rpt3	EG33_L292_rpt3		147	GGTAGTTC	EG33_L292_rpt3	EG33_L526_rpt3
148	CCGTAAGTC	EG33_L562_rpt3	EG33_L265_rpt3		148	CCGTAAGTC	EG33_L265_rpt3	EG33_L562_rpt3
149	ATACGTGC	EG33_L670_rpt4	EG33_L085_rpt4		149	ATACGTGC	EG33_L085_rpt4	EG33_L670_rpt4
150	GCATCAGCA	EG33_L742_rpt4	EG33_L175_rpt4		150	GCATCAGCA	EG33_L175_rpt4	EG33_L742_rpt4
151	ACCACTCA	EG33_L526_rpt4	EG33_L292_rpt4		151	ACCACTCA	EG33_L292_rpt4	EG33_L526_rpt4
152	TCAATGGCT	EG33_L562_rpt4	EG33_L265_rpt4		152	TCAATGGCT	EG33_L265_rpt4	EG33_L562_rpt4
153	AACTGTCC	EG33_L490_rpt3	EG33_L229_rpt3		153	AACTGTCC	EG33_L229_rpt3	EG33_L490_rpt3
154	ATCCTGGTA	EG33_L751_rpt3	EG33_L130_rpt3		154	ATCCTGGTA	EG33_L130_rpt3	EG33_L751_rpt3
155	CATCCAGT	EG33_L445_rpt3	EG33_L247_rpt3		155	CATCCAGT	EG33_L247_rpt3	EG33_L445_rpt3
156	CTGCGAATG	EG33_L571_rpt3	EG33_L112_rpt3		156	CTGCGAATG	EG33_L112_rpt3	EG33_L571_rpt3
157	GAGTACAG	EG33_L490_rpt4	EG33_L229_rpt4		157	GAGTACAG	EG33_L229_rpt4	EG33_L490_rpt4
158	GAGAGTCTG	EG33_L751_rpt4	EG33_L130_rpt4		158	GAGAGTCTG	EG33_L130_rpt4	EG33_L751_rpt4
159	CGTAGACT	EG33_L445_rpt4	EG33_L247_rpt4		159	CGTAGACT	EG33_L247_rpt4	EG33_L445_rpt4
160	TTCCTTCCA	EG33_L571_rpt4	EG33_L112_rpt4		160	TTCCTTCCA	EG33_L112_rpt4	EG33_L571_rpt4
161	TGCTTGTC	EG33_L688_rpt3	EG33_L040_rpt3		161	TGCTTGTC	EG33_L040_rpt3	EG33_L688_rpt3
162	ACATCGATG	EG33_L553_rpt3	EG33_L139_rpt3		162	ACATCGATG	EG33_L139_rpt3	EG33_L553_rpt3
163	CGTAGCTA	EG33_L760_rpt3	EG33_C006_rpt3		163	CGTAGCTA	EG33_C006 b_rpt3	EG33_L760_rpt3
164	CCTTCAACG	EG33_L679_rpt3	EG33_L355_rpt3		164	CCTTCAACG	EG33_L355_rpt3	EG33_L679_rpt3
165	CATCGGAT	EG33_L688_rpt4	EG33_L040_rpt4		165	CATCGGAT	EG33_L040_rpt4	EG33_L688_rpt4
166	GAAGAACCG	EG33_L553_rpt4	EG33_L139_rpt4		166	GAAGAACCG	EG33_L139_rpt4	EG33_L553_rpt4
167	GATGAGGT	EG33_L760_rpt4	EG33_C006_rpt4		167	GATGAGGT	EG33_C006 b_rpt4	EG33_L760_rpt4
168	TCTTCAGGT	EG33_L679_rpt4	EG33_L355_rpt4		168	TCTTCAGGT	EG33_L355_rpt4	EG33_L679_rpt4
169	TCGAAGTG	EG33_L418_rpt3	EG33_L121_rpt3		169	TCGAAGTG	EG33_L121_rpt3	EG33_L418_rpt3
170	AGATGCCTT	EG33_L598_rpt3	EG33_L337_rpt3		170	AGATGCCTT	EG33_L337_rpt3	EG33_L598_rpt3
171	AGATCAGC	EG33_L606_rpt3	EG33_C007_rpt3		171	AGATCAGC	EG33_C007_rpt3	EG33_L606_rpt3
172	CTCGACTCT	EG33_L499_rpt3	EG33_C005_rpt3		172	CTCGACTCT	EG33_C005_rpt3	EG33_L499_rpt3
173	TTCACTGG	EG33_L418_rpt4	EG33_L121_rpt4		173	TTCACTGG	EG33_L121_rpt4	EG33_L418_rpt4
174	GTGAAGTCG	EG33_L598_rpt4	EG33_L337_rpt4		174	GTGAAGTCG	EG33_L337_rpt4	EG33_L598_rpt4
175	CGGCATAA	EG33_L606_rpt4	EG33_C007_rpt4		175	CGGCATAA	EG33_C007_rpt4	EG33_L606_rpt4
176	TGGTGCATA	EG33_L499_rpt4	EG33_C005_rpt4		176	TGGTGCATA	EG33_C005_rpt4	EG33_L499_rpt4
177	TCGAGACA	EG33_L616_rpt3	EG33_L166_rpt3		177	TCGAGACA	EG33_L166_rpt3	EG33_L616_rpt3
178	ATAGTCGAG	EG33_L517_rpt3	EG33_L373_rpt3		178	ATAGTCGAG	EG33_C006 c_rpt3	EG33_L517_rpt3
179	GATGGTCA	EG33_L625_rpt3	EG33_L256_rpt3		179	GATGGTCA	EG33_L256_rpt3	EG33_L625_rpt3
180	CGGACTATG	EG33_L652_rpt3	EG33_C006_rpt3		180	CGGACTATG	EG33_C006_rpt3	EG33_L652_rpt3
181	TCGAGCAT	EG33_L616_rpt4	EG33_L166_rpt4		181	TCGAGCAT	EG33_L166_rpt4	EG33_L616_rpt4
182	GGTGCATTG	EG33_L517_rpt4	EG33_L373_rpt4		182	GGTGCATTG	EG33_C006 c_rpt4	EG33_L517_rpt4
183	ATTCGCAG	EG33_L625_rpt4	EG33_L256_rpt4		183	ATTCGCAG	EG33_L256_rpt4	EG33_L625_rpt4
184	TACAAGCTG	EG33_L652_rpt4	EG33_C006_rpt4		184	TACAAGCTG	EG33_C006_rpt4	EG33_L652_rpt4
185	ACAGGTCA	EG33_L535_rpt3	EG33_L157_rpt3		185	ACAGGTCA	EG33_L157_rpt3	EG33_L535_rpt3
186	AGTTGAGAG	EG33_C003_rpt3	EG33_C008_rpt3		186	AGTTGAGAG	EG33_C008(+) c_rpt3	EG33_C003_rpt3
187	AGATCTCG	EG33_L454_rpt3	EG33_L346_rpt3		187	AGATCTCG	EG33_L346_rpt3	EG33_L454_rpt3
188	CCGTCTACA	EG33_C006_rpt3	EG33_C007_rpt3		188	CCGTCTACA	EG33_C007_rpt3	EG33_C006_rpt3
189	ACCAACCT	EG33_L535_rpt4	EG33_L157_rpt4		189	ACCAACCT	EG33_L157_rpt4	EG33_L535_rpt4
190	GATGAGCAC	EG33_C003_rpt4	EG33_C008_rpt4		190	GATGAGCAC	EG33_C008(+) c_rpt4	EG33_C003_rpt4
191	GGTTACTG	EG33_L454_rpt4	EG33_L346_rpt4		191	GGTTACTG	EG33_L346_rpt4	EG33_L454_rpt4
192	TAGATGGAG	EG33_C006_rpt4	EG33_C007_rpt4		192	TAGATGGAG	EG33_C007_rpt4	EG33_C006_rpt4
193	CGTGATAC	EG33_C008_rpt5	EG33_L382_rpt5		193	CGTGATAC	not_used	not_used
194	ACTTCTTCC	EG33_L715_rpt5	EG33_L220_rpt5		194	ACTTCTTCC	not_used	not_used
195	ATTCTCGC	EG33_C005_rpt5	EG33_L094_rpt5		195	ATTCTCGC	not_used	not_used
196	CTCGATTGC	EG33_C001_rpt5	EG33_L283_rpt5		196	CTCGATTGC	not_used	not_used
197	CATGGCAA	EG33_C008_rpt6	EG33_L382_rpt6		197	CATGGCAA	not_used	not_used
198	GTCCGAAGA	EG33_L715_rpt6	EG33_L220_rpt6		198	GTCCGAAGA	not_used	not_used
199	TCTACACC	EG33_C005_rpt6	EG33_L094_rpt6		199	TCTACACC	not_used	not_used
200	TCTTGACGA	EG33_C001_rpt6	EG33_L283_rpt6		200	TCTTGACGA	not_used	not_used
201	TCGCATAC	EG33_L769_rpt5	EG33_L148_rpt5		201	TCGCATAC	not_used	not_used
202	ACATGTACG	EG33_L697_rpt5	EG33_L328_rpt5		202	ACATGTACG	not_used	not_used
203	TGAGTGAC	EG33_C004_rpt5	EG33_L399_rpt5		203	TGAGTGAC	not_used	not_used
204	CGGTTCGAA	EG33_L463_rpt5	EG33_C009_rpt5		204	CGGTTCGAA	not_used	not_used
205	TGGAACCT	EG33_L769_rpt6	EG33_L148_rpt6		205	TGGAACCT	not_used	not_used
206	GTAGTTCGG	EG33_L697_rpt6	EG33_L328_rpt6		206	GTAGTTCGG	not_used	not_used
207	ATAGTGGC	EG33_C004_rpt6	EG33_L399_rpt6		207	ATAGTGGC	not_used	not_used
208	TTCGCGATT	EG33_L463_rpt6	EG33_C009_rpt6		208	TTCGCGATT	not_used	not_used
209	CATGTGGA	EG33_L643_rpt5	EG33_L076_rpt5		209	CATGTGGA	not_used	not_used
210	ATCGCTCTA	EG33_L589_rpt5	EG33_C008_rpt5		210	ATCGCTCTA	not_used	not_used
211	AGCAACTG	EG33_L707_rpt5	EG33_L301_rpt5		211	AGCAACTG	not_used	not_used
212	CCGTTACGT	EG33_L472_rpt5	EG33_L391_rpt5		212	CCGTTACGT	not_used	not_used
213	GGTTGTAG	EG33_L643_rpt6	EG33_L076_rpt6		213	GGTTGTAG	not_used	not_used
214	GAGCAAGGT	EG33_L589_rpt6	EG33_C008_rpt6		214	GAGCAAGGT	not_used	not_used
215	CGTTAGAG	EG33_L707_rpt6	EG33_L301_rpt6		215	CGTTAGAG	not_used	not_used
216	TTGGTGATG	EG33_L472_rpt6	EG33_L391_rpt6		216	TTGGTGATG	not_used	not_used
217	GAGTCAGT	EG33_L634_rpt5	EG33_L274_rpt5		217	GAGTCAGT	not_used	not_used
218	AACCATGGA	EG33_L409_rpt5	EG33_L310_rpt5		218	AACCATGGA	not_used	not_used
219	TTCCGAAG	EG33_L661_rpt5	EG33_L364_rpt5		219	TTCCGAAG	not_used	not_used
220	CTCGGATCA	EG33_L427_rpt5	EG33_L238_rpt5		220	CTCGGATCA	not_used	not_used
221	ATTGCAGC	EG33_L634_rpt6	EG33_L274_rpt6		221	ATTGCAGC	not_used	not_used
222	GAAGCCGAA	EG33_L409_rpt6	EG33_L310_rpt6		222	GAAGCCGAA	not_used	not_used
223	GATTCCGA	EG33_L661_rpt6	EG33_L364_rpt6		223	GATTCCGA	not_used	not_used
224	TACCGCATA	EG33_L427_rpt6	EG33_L238_rpt6		224	TACCGCATA	not_used	not_used
225	TTCCTCAC	EG33_L580_rpt5	EG33_L193_rpt5		225	TTCCTCAC	not_used	not_used
226	AACCGTAAC	EG33_L730_rpt5	EG33_L049_rpt5		226	AACCGTAAC	not_used	not_used
227	GTAAGCGA	EG33_L724_rpt5	EG33_L067_rpt5		227	GTAAGCGA	not_used	not_used
228	CCAGGTGTT	EG33_L436_rpt5	EG33_L184_rpt5		228	CCAGGTGTT	not_used	not_used
229	TAACCGAC	EG33_L580_rpt6	EG33_L193_rpt6		229	TAACCGAC	not_used	not_used
230	GTACTCTCG	EG33_L730_rpt6	EG33_L049_rpt6		230	GTACTCTCG	not_used	not_used
231	AGCATCCA	EG33_L724_rpt6	EG33_L067_rpt6		231	AGCATCCA	not_used	not_used
232	TATTGGCGT	EG33_L436_rpt6	EG33_L184_rpt6		232	TATTGGCGT	not_used	not_used
233	ACCTAACC	EG33_C002_rpt5	EG33_L058_rpt5		233	ACCTAACC	not_used	not_used
234	AAAGCTCCA	EG33_L544_rpt5	EG33_L211_rpt5		234	AAAGCTCCA	not_used	not_used
235	TCGTATGG	EG33_L481_rpt5	EG33_L319_rpt5		235	TCGTATGG	not_used	not_used
236	CTTCGACGT	EG33_L508_rpt5	EG33_L103_rpt5		236	CTTCGACGT	not_used	not_used
237	AAGCTGTG	EG33_C002_rpt6	EG33_L058_rpt6		237	AAGCTGTG	not_used	not_used
238	GAGCATTGC	EG33_L544_rpt6	EG33_L211_rpt6		238	GAGCATTGC	not_used	not_used
239	AATCACGG	EG33_L481_rpt6	EG33_L319_rpt6		239	AATCACGG	not_used	not_used
240	TCTAACTCC	EG33_L508_rpt6	EG33_L103_rpt6		240	TCTAACTCC	not_used	not_used
241	TCGGACTT	EG33_L670_rpt5	EG33_L085_rpt5		241	TCGGACTT	not_used	not_used
242	ATAACGCTC	EG33_L742_rpt5	EG33_L175_rpt5		242	ATAACGCTC	not_used	not_used
243	TTCGATCG	EG33_L526_rpt5	EG33_L292_rpt5		243	TTCGATCG	not_used	not_used
244	CTGGCGTTA	EG33_L562_rpt5	EG33_L265_rpt5		244	CTGGCGTTA	not_used	not_used
245	AAGGACAC	EG33_L670_rpt6	EG33_L085_rpt6		245	AAGGACAC	not_used	not_used
246	GTACAGCCT	EG33_L742_rpt6	EG33_L175_rpt6		246	GTACAGCCT	not_used	not_used
247	GCAATCCA	EG33_L526_rpt6	EG33_L292_rpt6		247	GCAATCCA	not_used	not_used
248	TACCTCTGT	EG33_L562_rpt6	EG33_L265_rpt6		248	TACCTCTGT	not_used	not_used
249	GAACGACT	EG33_L490_rpt5	EG33_L229_rpt5		249	GAACGACT	not_used	not_used
250	AGCAATGGT	EG33_L751_rpt5	EG33_L130_rpt5		250	AGCAATGGT	not_used	not_used
251	ACCTGCAA	EG33_L445_rpt5	EG33_L247_rpt5		251	ACCTGCAA	not_used	not_used
252	CTCGTTCAC	EG33_L571_rpt5	EG33_L112_rpt5		252	CTCGTTCAC	not_used	not_used
253	AGCGACAT	EG33_L490_rpt6	EG33_L229_rpt6		253	AGCGACAT	not_used	not_used
254	GAAGGCATG	EG33_L751_rpt6	EG33_L130_rpt6		254	GAAGGCATG	not_used	not_used
255	CTGCTATC	EG33_L445_rpt6	EG33_L247_rpt6		255	CTGCTATC	not_used	not_used
256	TCAACAGTG	EG33_L571_rpt6	EG33_L112_rpt6		256	TCAACAGTG	not_used	not_used
257	GCACAGAA	EG33_L688_rpt5	EG33_L040_rpt5		257	GCACAGAA	not_used	not_used
258	AAAGGCTGT	EG33_L553_rpt5	EG33_L139_rpt5		258	AAAGGCTGT	not_used	not_used
259	AACCAGGA	EG33_L760_rpt5	EG33_C006_rpt5		259	AACCAGGA	not_used	not_used
260	CTCTAACCG	EG33_L679_rpt5	EG33_L355_rpt5		260	CTCTAACCG	not_used	not_used
261	GCACATTC	EG33_L688_rpt6	EG33_L040_rpt6		261	GCACATTC	not_used	not_used
262	GGAACTCGT	EG33_L553_rpt6	EG33_L139_rpt6		262	GGAACTCGT	not_used	not_used
263	CAACCAAG	EG33_L760_rpt6	EG33_C006_rpt6		263	CAACCAAG	not_used	not_used
264	TTTCCGCTT	EG33_L679_rpt6	EG33_L355_rpt6		264	TTTCCGCTT	not_used	not_used
265	GAACTGCA	EG33_L418_rpt5	EG33_L121_rpt5		265	GAACTGCA	not_used	not_used
266	ACCAATAGC	EG33_L598_rpt5	EG33_L337_rpt5		266	ACCAATAGC	not_used	not_used
267	GCACTAAC	EG33_L606_rpt5	EG33_C007_rpt5		267	GCACTAAC	not_used	not_used
268	CTTCGTGCT	EG33_L499_rpt5	EG33_C005_rpt5		268	CTTCGTGCT	not_used	not_used
269	TCTAAGGC	EG33_L418_rpt6	EG33_L121_rpt6		269	TCTAAGGC	not_used	not_used
270	GTGGTCGTA	EG33_L598_rpt6	EG33_L337_rpt6		270	GTGGTCGTA	not_used	not_used
271	ACCTTGTG	EG33_L606_rpt6	EG33_C007_rpt6		271	ACCTTGTG	not_used	not_used
272	TAGTAACGC	EG33_L499_rpt6	EG33_C005_rpt6		272	TAGTAACGC	not_used	not_used
273	TTCGTTGC	EG33_L616_rpt5	EG33_L166_rpt5		273	TTCGTTGC	not_used	not_used
274	AATCACCAG	EG33_L517_rpt5	EG33_L373_rpt5		274	AATCACCAG	not_used	not_used
275	CAACGAGA	EG33_L625_rpt5	EG33_L256_rpt5		275	CAACGAGA	not_used	not_used
276	CGGTGTAAG	EG33_L652_rpt5	EG33_C006_rpt5		276	CGGTGTAAG	not_used	not_used
277	GCACTTGA	EG33_L616_rpt6	EG33_L166_rpt6		277	GCACTTGA	not_used	not_used
278	GCTACAGAC	EG33_L517_rpt6	EG33_L373_rpt6		278	GCTACAGAC	not_used	not_used
279	CCACACTT	EG33_L625_rpt6	EG33_L256_rpt6		279	CCACACTT	not_used	not_used
280	TGTGTACCA	EG33_L652_rpt6	EG33_C006_rpt6		280	TGTGTACCA	not_used	not_used
281	TATCCTCC	EG33_L535_rpt5	EG33_L157_rpt5		281	TATCCTCC	not_used	not_used
282	ATTCTAGGC	EG33_C003_rpt5	EG33_C008_rpt5		282	ATTCTAGGC	not_used	not_used
283	GAAGATCC	EG33_L454_rpt5	EG33_L346_rpt5		283	GAAGATCC	not_used	not_used
284	CAGCTCAAG	EG33_C006_rpt5	EG33_C007_rpt5		284	CAGCTCAAG	not_used	not_used
285	TGCCATCT	EG33_L535_rpt6	EG33_L157_rpt6		285	TGCCATCT	not_used	not_used
286	GTCGTTGCT	EG33_C003_rpt6	EG33_C008_rpt6		286	GTCGTTGCT	not_used	not_used
287	CCACGTTA	EG33_L454_rpt6	EG33_L346_rpt6		287	CCACGTTA	not_used	not_used
288	TGAAGCTGA	EG33_C006_rpt6	EG33_C007_rpt6		288	TGAAGCTGA	not_used	not_used
289	CCACTGAT	EG33_C008_rpt7	EG33_L382_rpt7		289	CCACTGAT	not_used	not_used
290	ACCTTGGAA	EG33_L715_rpt7	EG33_L220_rpt7		290	ACCTTGGAA	not_used	not_used
291	GAAGGAAG	EG33_C005_rpt7	EG33_L094_rpt7		291	GAAGGAAG	not_used	not_used
292	CCAAGAAGG	EG33_C001_rpt7	EG33_L283_rpt7		292	CCAAGAAGG	not_used	not_used
293	CTGATCCA	EG33_C008_rpt8	EG33_L382_rpt8		293	CTGATCCA	not_used	not_used
294	GACGAACTC	EG33_L715_rpt8	EG33_L220_rpt8		294	GACGAACTC	not_used	not_used
295	CAAGACTC	EG33_C005_rpt8	EG33_L094_rpt8		295	CAAGACTC	not_used	not_used
296	TTAAGGCGT	EG33_C001_rpt8	EG33_L283_rpt8		296	TTAAGGCGT	not_used	not_used
297	AGCTGTGA	EG33_L769_rpt7	EG33_L148_rpt7		297	AGCTGTGA	not_used	not_used
298	AAAGTCGTC	EG33_L697_rpt7	EG33_L328_rpt7		298	AAAGTCGTC	not_used	not_used
299	ACGATCGT	EG33_C004_rpt7	EG33_L399_rpt7		299	ACGATCGT	not_used	not_used
300	CCTACTCAG	EG33_L463_rpt7	EG33_C009_rpt7		300	CCTACTCAG	not_used	not_used
301	AAGTGCGA	EG33_L769_rpt8	EG33_L148_rpt8		301	AAGTGCGA	not_used	not_used
302	GAGCTTCGT	EG33_L697_rpt8	EG33_L328_rpt8		302	GAGCTTCGT	not_used	not_used
303	CAAGCACT	EG33_C004_rpt8	EG33_L399_rpt8		303	CAAGCACT	not_used	not_used
304	TATCAGAGC	EG33_L463_rpt8	EG33_C009_rpt8		304	TATCAGAGC	not_used	not_used
305	GTAGCGAA	EG33_L643_rpt7	EG33_L076_rpt7		305	GTAGCGAA	not_used	not_used
306	AAGAGGCAA	EG33_L589_rpt7	EG33_C008_rpt7		306	AAGAGGCAA	not_used	not_used
307	GAAGTGTG	EG33_L707_rpt7	EG33_L301_rpt7		307	GAAGTGTG	not_used	not_used
308	CCAAGCGTA	EG33_L472_rpt7	EG33_L391_rpt7		308	CCAAGCGTA	not_used	not_used
309	GTAGCTTC	EG33_L643_rpt8	EG33_L076_rpt8		309	GTAGCTTC	not_used	not_used
310	GACGCAGTA	EG33_L589_rpt8	EG33_C008_rpt8		310	GACGCAGTA	not_used	not_used
311	CTAGACCT	EG33_L707_rpt8	EG33_L301_rpt8		311	CTAGACCT	not_used	not_used
312	TGCATGGTT	EG33_L472_rpt8	EG33_L391_rpt8		312	TGCATGGTT	not_used	not_used
313	GCATGTAC	EG33_L634_rpt7	EG33_L274_rpt7		313	GCATGTAC	not_used	not_used
314	AGACATTCC	EG33_L409_rpt7	EG33_L310_rpt7		314	AGACATTCC	not_used	not_used
315	ACGCGTAT	EG33_L661_rpt7	EG33_L364_rpt7		315	ACGCGTAT	not_used	not_used
316	CCAAGGTTG	EG33_L427_rpt7	EG33_L238_rpt7		316	CCAAGGTTG	not_used	not_used
317	GCATTACG	EG33_L634_rpt8	EG33_L274_rpt8		317	GCATTACG	not_used	not_used
318	GAGGACCTA	EG33_L409_rpt8	EG33_L310_rpt8		318	GAGGACCTA	not_used	not_used
319	CAAGTCCA	EG33_L661_rpt8	EG33_L364_rpt8		319	CAAGTCCA	not_used	not_used
320	TCTAGCAGA	EG33_L427_rpt8	EG33_L238_rpt8		320	TCTAGCAGA	not_used	not_used
321	ATCCACCA	EG33_L580_rpt7	EG33_L193_rpt7		321	ATCCACCA	not_used	not_used
322	ACCATCCAA	EG33_L730_rpt7	EG33_L049_rpt7		322	ACCATCCAA	not_used	not_used
323	AGCAGTCT	EG33_L724_rpt7	EG33_L067_rpt7		323	AGCAGTCT	not_used	not_used
324	CTATGCAGG	EG33_L436_rpt7	EG33_L184_rpt7		324	CTATGCAGG	not_used	not_used
325	TCTCCAGA	EG33_L580_rpt8	EG33_L193_rpt8		325	TCTCCAGA	not_used	not_used
326	GCTAGCTAG	EG33_L730_rpt8	EG33_L049_rpt8		326	GCTAGCTAG	not_used	not_used
327	GAATCCAC	EG33_L724_rpt8	EG33_L067_rpt8		327	GAATCCAC	not_used	not_used
328	TACGGATTG	EG33_L436_rpt8	EG33_L184_rpt8		328	TACGGATTG	not_used	not_used
329	TATGCGCA	EG33_C002_rpt7	EG33_L058_rpt7		329	TATGCGCA	not_used	not_used
330	ATGTATCGG	EG33_L544_rpt7	EG33_L211_rpt7		330	ATGTATCGG	not_used	not_used
331	ACGGTAGA	EG33_L481_rpt7	EG33_L319_rpt7		331	ACGGTAGA	not_used	not_used
332	CCGAGATCA	EG33_L508_rpt7	EG33_L103_rpt7		332	CCGAGATCA	not_used	not_used
333	CAATACCG	EG33_C002_rpt8	EG33_L058_rpt8		333	CAATACCG	not_used	not_used
334	GTACGTCTC	EG33_L544_rpt8	EG33_L211_rpt8		334	GTACGTCTC	not_used	not_used
335	GCCAGTTA	EG33_L481_rpt8	EG33_L319_rpt8		335	GCCAGTTA	not_used	not_used
336	TTAGGTAGC	EG33_L508_rpt8	EG33_L103_rpt8		336	TTAGGTAGC	not_used	not_used
337	TCTCGTCA	EG33_L670_rpt7	EG33_L085_rpt7		337	TCTCGTCA	not_used	not_used
338	ATGCCTTGA	EG33_L742_rpt7	EG33_L175_rpt7		338	ATGCCTTGA	not_used	not_used
339	TTGACGGT	EG33_L526_rpt7	EG33_L292_rpt7		339	TTGACGGT	not_used	not_used
340	CAATACGGC	EG33_L562_rpt7	EG33_L265_rpt7		340	CAATACGGC	not_used	not_used
341	TCTCTCGT	EG33_L670_rpt8	EG33_L085_rpt8		341	TCTCTCGT	not_used	not_used
342	GCCATTGCA	EG33_L742_rpt8	EG33_L175_rpt8		342	GCCATTGCA	not_used	not_used
343	ATCGAGAC	EG33_L526_rpt8	EG33_L292_rpt8		343	ATCGAGAC	not_used	not_used
344	TAGGCAAGT	EG33_L562_rpt8	EG33_L265_rpt8		344	TAGGCAAGT	not_used	not_used
345	ACCGTCTT	EG33_L490_rpt7	EG33_L229_rpt7		345	ACCGTCTT	not_used	not_used
346	ACCGAACAA	EG33_L751_rpt7	EG33_L130_rpt7		346	ACCGAACAA	not_used	not_used
347	CAATCCGT	EG33_L445_rpt7	EG33_L247_rpt7		347	CAATCCGT	not_used	not_used
348	CGCCTATCT	EG33_L571_rpt7	EG33_L112_rpt7		348	CGCCTATCT	not_used	not_used
349	TTGAGAGG	EG33_L490_rpt8	EG33_L229_rpt8		349	TTGAGAGG	not_used	not_used
350	GCAGAACGT	EG33_L751_rpt8	EG33_L130_rpt8		350	GCAGAACGT	not_used	not_used
351	GTATCGTG	EG33_L445_rpt8	EG33_L247_rpt8		351	GTATCGTG	not_used	not_used
352	TACGTCACA	EG33_L571_rpt8	EG33_L112_rpt8		352	TACGTCACA	not_used	not_used
353	CCGACATA	EG33_L688_rpt7	EG33_L040_rpt7		353	CCGACATA	not_used	not_used
354	AACGTCTAC	EG33_L553_rpt7	EG33_L139_rpt7		354	AACGTCTAC	not_used	not_used
355	TAGAGGAC	EG33_L760_rpt7	EG33_C006_rpt7		355	TAGAGGAC	not_used	not_used
356	CATCGCTGA	EG33_L679_rpt7	EG33_L355_rpt7		356	CATCGCTGA	not_used	not_used
357	GAATTGGC	EG33_L688_rpt8	EG33_L040_rpt8		357	GAATTGGC	not_used	not_used
358	GATCGGATG	EG33_L553_rpt8	EG33_L139_rpt8		358	GATCGGATG	not_used	not_used
359	ACGTGCTT	EG33_L760_rpt8	EG33_C006_rpt8		359	ACGTGCTT	not_used	not_used
360	TTGTCGTAC	EG33_L679_rpt8	EG33_L355_rpt8		360	TTGTCGTAC	not_used	not_used
361	TCCTTAGC	EG33_L418_rpt7	EG33_L121_rpt7		361	TCCTTAGC	not_used	not_used
362	ACCGTAAGA	EG33_L598_rpt7	EG33_L337_rpt7		362	ACCGTAAGA	not_used	not_used
363	TTGATGCG	EG33_L606_rpt7	EG33_C007_rpt7		363	TTGATGCG	not_used	not_used
364	CAGGTAGTG	EG33_L499_rpt7	EG33_C005_rpt7		364	CAGGTAGTG	not_used	not_used
365	CCGTAGTT	EG33_L418_rpt8	EG33_L121_rpt8		365	CCGTAGTT	not_used	not_used
366	GCTTGTGAC	EG33_L598_rpt8	EG33_L337_rpt8		366	GCTTGTGAC	not_used	not_used
367	GCGGTATT	EG33_L606_rpt8	EG33_C007_rpt8		367	GCGGTATT	not_used	not_used
368	TTTGCAGCA	EG33_L499_rpt8	EG33_C005_rpt8		368	TTTGCAGCA	not_used	not_used
369	CGAAGGAT	EG33_L616_rpt7	EG33_L166_rpt7		369	CGAAGGAT	not_used	not_used
370	AAGGTGACT	EG33_L517_rpt7	EG33_L373_rpt7		370	AAGGTGACT	not_used	not_used
371	GCAGGATA	EG33_L625_rpt7	EG33_L256_rpt7		371	GCAGGATA	not_used	not_used
372	CCCTAAGCT	EG33_L652_rpt7	EG33_C006_rpt7		372	CCCTAAGCT	not_used	not_used
373	GTCAATGC	EG33_L616_rpt8	EG33_L166_rpt8		373	GTCAATGC	not_used	not_used
374	GTCTGTTCG	EG33_L517_rpt8	EG33_L373_rpt8		374	GTCTGTTCG	not_used	not_used
375	TGCAACGA	EG33_L625_rpt8	EG33_L256_rpt8		375	TGCAACGA	not_used	not_used
376	TGGAGACTT	EG33_L652_rpt8	EG33_C006_rpt8		376	TGGAGACTT	not_used	not_used
377	CACACTCT	EG33_L535_rpt7	EG33_L157_rpt7		377	CACACTCT	not_used	not_used
378	ACACAGAGT	EG33_C003_rpt7	EG33_C008_rpt7		378	ACACAGAGT	not_used	not_used
379	ACTACTGG	EG33_L454_rpt7	EG33_L346_rpt7		379	ACTACTGG	not_used	not_used
380	CTGTGCTTG	EG33_C006_rpt7	EG33_C007_rpt7		380	CTGTGCTTG	not_used	not_used
381	CCTAGAGA	EG33_L535_rpt8	EG33_L157_rpt8		381	CCTAGAGA	not_used	not_used
382	GACCAGTAC	EG33_C003_rpt8	EG33_C008_rpt8		382	GACCAGTAC	not_used	not_used
383	CTAGGTGT	EG33_L454_rpt8	EG33_L346_rpt8		383	CTAGGTGT	not_used	not_used
384	TACGGAACT	EG33_C006_rpt8	EG33_C007_rpt8		384	TACGGAACT	not_used	not_used
